# Supplementary material for: Sleep and use of electronic devices in adolescence: results from a large population-based study
Source: PubMed Central journal article supplement — BMJ Open. 2015 Jan 15;5(1):e006748. doi: 10.1136/bmjopen-2014-006748 (PMC4316480; doi:10.1136/bmjopen-2014-006748), 2015-01-15
Supplement: bmjopen-2014-006748.draft_revisions.pdf [file bmjopen-2014-006748.draft_revisions.pdf]

# BMJ Open

## Sleep in the digital adolescent. Results from a large population-based study

|                                 |                                                                                                                                                                                                                                                                                                                                                                                                                                                                                                                                                                                                                                             |
|---------------------------------|---------------------------------------------------------------------------------------------------------------------------------------------------------------------------------------------------------------------------------------------------------------------------------------------------------------------------------------------------------------------------------------------------------------------------------------------------------------------------------------------------------------------------------------------------------------------------------------------------------------------------------------------|
| Journal:                        | <i>BMJ Open</i>                                                                                                                                                                                                                                                                                                                                                                                                                                                                                                                                                                                                                             |
| Manuscript ID:                  | bmjopen-2014-006748                                                                                                                                                                                                                                                                                                                                                                                                                                                                                                                                                                                                                         |
| Article Type:                   | Research                                                                                                                                                                                                                                                                                                                                                                                                                                                                                                                                                                                                                                    |
| Date Submitted by the Author:   | 26-Sep-2014                                                                                                                                                                                                                                                                                                                                                                                                                                                                                                                                                                                                                                 |
| Complete List of Authors:       | Hysing, Mari; Uni Research Health, Regional Centre for Child and Youth Mental Health and Child Welfare<br>Pallesen, Staale; University of Bergen, Department of Psychosocial Science<br>Stormark, Kjell Morten; Uni Research Health, Regional Centre for Child and Youth Mental Health and Child Welfare<br>Jakobsen, Reidar; Uni Health, Uni Research, Regional Centre for Child and Youth Mental Health and Child Welfare<br>Lundervold, Astri; University of Bergen, Department of Biological and Medical Psychology<br>Sivertsen, Børge; Norwegian Institute of Public Health, Department of Public Mental Health; Uni Research Health, |
| <b>Primary Subject Heading</b>: | Epidemiology                                                                                                                                                                                                                                                                                                                                                                                                                                                                                                                                                                                                                                |
| Secondary Subject Heading:      | Mental health                                                                                                                                                                                                                                                                                                                                                                                                                                                                                                                                                                                                                               |
| Keywords:                       | sleep, media use, Epidemiology < TROPICAL MEDICINE, adolescents                                                                                                                                                                                                                                                                                                                                                                                                                                                                                                                                                                             |
|                                 |                                                                                                                                                                                                                                                                                                                                                                                                                                                                                                                                                                                                                                             |

SCHOLARONE™  
Manuscripts

only

# Sleep in the digital adolescent.

Results from a large population-based study.

Mari Hysing PhD <sup>a</sup>, Ståle Pallesen PhD <sup>b,c</sup>, Kjell Morten Stormark PhD <sup>a</sup>,  
Reidar Jakobsen PhD <sup>a</sup>, Astri J. Lundervold PhD <sup>a,d</sup>, Børge Sivertsen PhD <sup>e,f,g</sup>

- a) Regional Centre for Child and Youth Mental Health and Child Welfare, Uni Research Health, Bergen, P.O.Box 7810, N-5020 Bergen, Norway
- b) Department of Psychosocial Science, University of Bergen, N-5015 Bergen, Norway.
- c) Norwegian Competence Center for Sleep Disorders, Haukeland University Hospital, Jonas Lies vei 65, 5021 Bergen, Norway
- d) Department of Biological and Medical Psychology, University of Bergen, Jonas Lies vei 91, 5009 Bergen, Norway
- e) Division of Mental Health, Norwegian Institute of Public Health, Kalfarveien 31, 5018 Bergen, Norway
- f) Uni Research Health Bergen, P.O.Box 7810, N-5020 Bergen, Norway
- g) Department of Psychiatry, Helse Fonna HF, P.O.Box 2170, N-5504 Haugesund, Norway

**Corresponding author:** Dr. Mari Hysing, Regional Centre for Child and Youth Mental Health and Child Welfare, Postboks 7810, 5020 Bergen, Norway, Email: [mari.hysing@uni.no](mailto:mari.hysing@uni.no); Phone: +47 55 58 86 98

**Running title:** Sleep in the digital adolescent

**Keywords:** sleep; media use; epidemiology; adolescents

Total page count: 20

Word count for abstract: 251 (max 300)

Word count for body text: 3,245 (max 4000)

Number of tables: 2

Number of figures: 4

## ABSTRACT

**Objectives:** Adolescents spend increasingly more time on electronic devices, and sleep deficiency rising in adolescents constitutes a major public health concern. The aim of the present study was to investigate daytime screen use and use of electronic devices before bedtime in relation to sleep.

**Design:** A large cross-sectional population-based survey study from 2012, the youth@hordaland study, in Hordaland County in Norway.

**Setting:** General community-based study.

**Participants:** 9,846 adolescents from three age cohorts aged 16-19. The main independent variables were type and frequency of electronic devices at bedtime and hours of screen-time during leisure time.

**Outcomes:** Sleep variables calculated based on self-report including bedtime, rise time, time in bed, sleep duration, sleep onset latency and wake after sleep onset.

**Results:** Adolescents spent a large amount of time during the day and at bedtime using electronic devices. Both day- and bedtime use of electronic devices were related to sleep measures, with an increased risk of short sleep duration, long sleep onset latency and increased sleep deficiency. A dose-response relationship emerged between sleep duration and use of electronic devices, exemplified by the association between PC use and risk of less than five hours of sleep (OR=2.70, CI95% 2.14-3.39), and a comparable lower odds for 7-8 hours of sleep (OR=1.64, CI95% 1.38-1.96).

**Conclusions:** Use of electronic devices is frequently used in adolescents, both during the day and at bedtime. The results demonstrate a negative relation between use of technology and sleep, suggesting that recommendations on healthy media use could include restrictions on electronic devices.

## STRENGTHS AND LIMITATIONS OF THIS STUDY

- This study employed a large well-defined population-based sample of adolescents.
- The data employed in this study is from a recent data collection.
- This study included several detailed measures of sleep patterns and sleep problems, as well as detailed measures of media use.
- The cross-sectional design of this study precluded any causal inference.
- This study only had a limited age-range.

## BACKGROUND

In the last decade we have witnessed a sharp increase in the availability and use of electronic devices such as smart phones, video game consoles, television, audio players, computers and tablets. Due to this, electronic devices have become an integral part of adolescent life, as exemplified by almost all American adolescents (97%) reporting to have at least one electronic media device in their bedroom [1]. In addition to the entertaining aspects, electronic devices play an important part in the social lives of adolescents. The constant change towards a more active, stimulating and social media use may however affect sleep in a negative way [2].

Parallel with the increased use of electronic devices, there has been a shift towards poorer sleep over the past decades among adolescents [3]. Recent epidemiological data on adolescent sleep shows that it on average is characterized by late bedtime, long sleep onset latency (SOL) and a short sleep duration of approximately 6 ½ hours on weekdays contributing to a daily sleep deficiency of about two hours [4].

The high rate of media use in adolescence may be one factor that is related to the short sleep duration and late bedtimes. TV use has consistently and inversely been associated with sleep duration [5, 6], as well as delayed bedtime and wake-up time in adolescents [7]. A high level of computer use has been found to be related to sleep problems [8], reduced time in bed [9, 10] and increased sleep onset latency [11]. Overall, electronic media use has been consistently linked with delayed bedtime and shortened sleep according to a review of the literature. However, some shortcomings in the existing literature were noted in the review. Future studies were recommended to measure sleep by self-report estimates of sleep parameters such as bedtime, sleep onset latency, time spent awake after sleep onset, wake-up time, and rise time, each estimated separately for weekdays and weekend days [12]. Newer technology, such as portable electronic devices has also been recommended to be included in future studies on this topic. Related to this, many of the previous studies have restricted their investigation to only one or two electronic devices [2, 10, 13]. Whether the same pattern of sleep problems is present across type of electronic devices is thus uncertain.

The present study will expand on the previous studies by taking a broad approach including measures of sleep duration, sleep onset latency, and sleep deficiency as well as including newer technological devices. Based on the presented literature on adolescent media use, we expected that the majority of adolescents would use electronic media devices at bedtime. Further, electronic media use was expected to be inversely related to sleep duration and

1  
2  
3 positively related to sleep onset latency and sleep deficiency. Finally, we expected the  
4 association between sleep and media use to be similar across all devices/platforms.  
5  
6  
7

## 8 9 **METHODS**

### 10 11 **Study population**

12 In this population-based study, we used data from the youth@hordaland survey of adolescents  
13 in the county of Hordaland in Western Norway. All adolescent born between 1993 and 1995  
14 and all students attending secondary education during spring 2012 were invited. The main  
15 aim of survey was to assess prevalence of mental health problems and service use in  
16 adolescents. Data were collected during spring 2012. Adolescents in secondary education  
17 received information per e-mail, and time during regular school hours was allocated for them  
18 to complete the questionnaire. A teacher was present to organize the data collection and to  
19 ensure confidentiality. Those not in school received information by postal mail to their home  
20 addresses. Survey staff was available on a phone number for both the adolescents and school  
21 personnel for answering queries.  
22  
23  
24  
25  
26  
27  
28  
29

### 30 31 **Sample**

32 A total of 19430 adolescents born between 1993-1995 were invited to participate, of which  
33 10220 agreed, yielding a participation rate of 53%. The mean age of those participating was  
34 17 years, and the sample included more girls (53.5% / n=5252) than boys (46.5% / n=4594).  
35 The majority (97.9% / n=9219) were high school students.  
36  
37  
38  
39

40 Sleep variables were checked for validity of answers based on preliminary data analysis,  
41 resulting in data from 374 subjects being excluded due to obvious invalid responses (e.g.,  
42 negative sleep duration and sleep efficiency). Thus, the total sample size in the current study  
43 was 9875.  
44  
45  
46

### 47 48 **Instruments**

#### 49 *Use of electronic devices at bedtime*

50 Adolescents reported use of six different electronic media devices and if they used them in  
51 the bedroom the last hour before they went to sleep. Drag and drop function was incorporated  
52 as a feature of the online questionnaire. An image with corresponding description of the  
53 device was dragged and dropped to indicate use, and ranked by frequency of use with the  
54 most frequently used device in the top box etc. The indicated devices comprised PC, cell  
55 phone, MP3 player, tablet, game console and TV.  
56  
57  
58  
59  
60

### *Screen time during daytime*

Time spent on screen-based activity was assessed by the following question: “Outside of school hours how much time do you usually spend on the following on weekdays 1) TV-games (PlayStation, Xbox, Wii etc.), 2) PC games, 3) Internet chatting, 4) writing and reading emails, 5) using the PC for other purposes)?” The responses alternatives were: “no time”, “less than ½ hour”, “½ hour to 1 hour”, “2-3 hours”, “4 hours” and “more than 4 hours”. A similar question has been used in the Health Behaviour in School-aged Children (HBSC) studies [14]. A 2 hour cut-off was used as most recommendations for screen-based activities restrict this to about 2 hours per day and this cut-off has also been used in previous relevant studies [15][16, 17]

### *Sleep variables*

Self-reported bedtime and rise time were indicated in hours and minutes using a scroll down menu with five minutes intervals and were reported separately for weekend and weekdays. Time in bed (TIB) was calculated by subtracting bedtime from rise time. Sleep onset latency (SOL) and wake after sleep onset (WASO) were indicated in hours and minutes using a scroll down menu with five minutes intervals, and sleep duration was defined as TIB minus SOL and WASO. Sleep duration was split into 10 categories, and SOL was categorized as either more or less than 60 minutes. Subjective sleep need was reported in hours and minutes on a scroll down menu with five minutes intervals, and sleep deficiency was calculated separately for weekends and weekdays, subtracting total sleep duration from subjective sleep need. Weekday sleep deficiency is used in the present study, and was dichotomized into <2 hours and  $\geq 2$  hours.

### **Statistics**

IBM SPSS Statistics 22 for Windows (SPSS Inc., Chicago, Ill) was used for all analyses. Chi-square tests were used to examine gender differences in use of electronic devices and daytime screen use. Independent sample t-tests and chi-square tests were used to examine the associations between sleep duration, electronic devices and daytime screen use. Logistic regression analyses using SOL of more than 60 minutes and sleep deficiency as outcome variables were conducted for all electronic devices and daytime screen (exposure variables). Multinomial logistic regression analyses were conducted with short sleep duration as the outcome variable (8-9 hours as the reference category) and electronic devices and daytime screen as the exposure variables. To investigate whether odds-ratios differed significantly between genders, we calculated the relative risk ratio (RRR) [18]. As these analyses yielded

1  
2  
3 no significant gender differences, the results of the logistic regressions are presented without  
4 gender stratification.  
5  
6  
7

### 8 9 **Ethics**

10  
11 The study was approved by the Regional Committee for Medical and Health Research Ethics  
12 (REC) in Western Norway. In accordance with the regulations from the REC and Norwegian  
13 health authorities, adolescents aged 16 years and older can make decisions regarding their  
14 own health, and may thus give consent themselves to participate in health studies.  
15

16 Parents/guardians have the right to be informed, and in the current study, all  
17 parents/guardians received written information about the study in advance. If the adolescents  
18 decided to participate they indicated if they wanted to participate in the study as a whole, or  
19 they could choose three options to specify their level of consent: 1) to complete the  
20 questionnaire, 2) obtain information from parent questionnaire 3) linking data to national  
21 registries.  
22  
23  
24  
25  
26  
27  
28  
29

## 30 31 **RESULTS**

### 32 33 **Use of electronic devices before bedtime and daytime screen time**

34 The use of electronic devices stratified by gender is shown in Figure 1. Most adolescents used  
35 an electronic device in the hour before bedtime. Some gender differences emerged, with more  
36 boys using game consoles, whereas girls reported higher use of cell phones and Mp3 players  
37 ( $P_s < .001$ ).  
38  
39  
40  
41  
42

43 -----  
44 Please insert Figure 1 about here  
45 -----  
46

47  
48 The average number of hours of screen time stratified by gender is presented in Figure 2.  
49 Girls reported significantly more online chatting and other PC use, while boys reported more  
50 console games and PC games (all  $P_s < .001$ ).  
51  
52  
53

54  
55 -----  
56 Please insert Figure 2 about here  
57 -----  
58  
59  
60

1  
2  
3  
4 When asked to indicate which electronic devices the adolescents used most often, PCs or  
5 cellphones were ranked highest (Figure 3).  
6  
7  
8

9 -----  
10 Please insert Figure 3 about here  
11 -----  
12  
13

### 14 15 16 17 **Electronic devices at bedtime and daytime screen use in relation to long sleep onset** 18 **latency**

19 The odds ratios for reporting SOL of more than 60 minutes were calculated separately for  
20 each electronic device (Table 1). Use of PC, cell phone, Mp3-player, tablet, game console and  
21 TV were all associated with increased odds of SOL of more than 60 minutes.  
22  
23

24 Daytime screen use showed the same pattern. A total screen time after school hours for more  
25 than four hours was related to long SOL (OR: 1.49, CI95% 1.36-1.64). When analyses were  
26 conducted separately for each electronic device, all daytime screen use over two hours was  
27 significantly associated with long SOL (see Table 1).  
28  
29  
30  
31  
32

### 33 34 35 **Electronic devices at bedtime and daytime screen use in relation to sleep deficiency**

36 The odds for sleep deficiency of more than two hours were calculated separately for each  
37 electronic device (Table 1). Use of PC, cell phone, Mp3-player, game console and TV in the  
38 hour before bedtime were all associated with increased odds of sleep deficiency.  
39  
40  
41

42 Total daytime screen use after school of more than four hours was positively related to sleep  
43 deficiency. When analyses were conducted separately for different electronic devices, all  
44 daytime screen use over two hours were significantly associated with sleep deficiency.  
45  
46  
47

48 -----  
49 Please insert Table 1 about here  
50 -----  
51  
52

### 53 54 55 **Electronic devices at bedtime and daytime screen use in relation to sleep duration**

56 Hours of daytime screen use are presented in Figure 4. The odds for reporting short sleep  
57 duration (covering 4 different categories), with 8-9 hours as the reference category, was  
58  
59  
60



1  
2  
3 calculated separately for each electronic device (Table 2). A dose-response relationship  
4 emerged with the highest risk of short sleep duration under five hours, exemplified by the  
5 association between PC use and risk of less than five hours of sleep (OR: 2.70 CI95% 2.14-  
6 3.39), while the risk for 7-8 hours of sleep equaled an OR=1.64 (CI95% 1.38-1.96).  
7  
8  
9

10  
11 -----  
12 Please insert Figure 4 and Table 2 about here  
13 -----  
14

15 Daytime screen use showed a similar pattern. Total screen time above 4 hours was associated  
16 with an increased risk of less than five hours of sleep (OR: 3.64 CI95% 3.06-4.33), while the  
17 risk for 7-8 hours of sleep was OR=1.29 (CI95% 1.12-1.49). See Table 2 for details.  
18  
19

### 20 21 **Multitasking of electronic devices at bedtime**

22 The risk of SOL of more than 60 minutes was increased in adolescents using 4 devices or  
23 more compared to adolescents using only one device (OR=1.26 (95% CI 1.07-1.49). The ORs  
24 for sleep deficiency for multitasking 2-3 devices was 1.50 (95% CI 1.26-1.79) and 4 or more  
25 devices 1.75 (95% CI 1.46-2.08), in comparison to using only one device. The ORs for  
26 sleeping less than 5 hours among multitasking teens ranged from 2.2 to 2.8 (depending on  
27 number of used devices) compared to only one device. The corresponding OR-ranges for  
28 sleeping 5-6 hour, 6-7 hours and 7-8 hours were 1.8-2.4, 1.9-2.1, and 1.4-1.5 respectively (all  
29  $P$ s<.001 compared to sleeping 8-9 hours).  
30  
31  
32  
33  
34  
35  
36  
37  
38  
39

### 40 **DISCUSSION**

41  
42 In short, almost all adolescents reported using one or more devices during the last hour before  
43 bedtime. Use of electronic devices was significantly and positively associated with SOL and  
44 sleep deficiency and we also found an inverse dose-response relationship between sleep  
45 duration and media use.  
46  
47  
48

49  
50 The present study adds to the literature by showing that both day- and bedtime use of  
51 electronic devices across a range of platforms, including newer technology, are related to  
52 several sleep parameters. While the frequency of use differed between the various devices,  
53 the relation between different types of electronic devices and sleep remained significant. This  
54 suggests that the established relationship between TV and sleep found in previous studies [5,  
55 6] can be generalized to newer technology. The relation between sleep and PC-use that has  
56  
57  
58  
59  
60

1  
2  
3 been demonstrated in previous studies in relation to poor sleep [8] and reduced time in bed [9,  
4 10], was further corroborated by the results of the present study as PC was both one of the  
5 most frequently used platforms and showed also the highest risks for short sleep duration and  
6 sleep deficiency. Using multiple devices before bedtime was related to longer SOL and  
7 shorter sleep duration compared using only one electronic device,  
8  
9

10  
11  
12 There are probably multiple pathways explaining the associations between sleep and  
13 electronic devices. Media use may directly affect sleep by replacing it due to its time  
14 consuming nature, or may interfere with sleep through increased psychophysiological arousal.  
15 Alternatively the bright light exposure inherent in most electronic media devices [12] may  
16 interfere with sleep by delaying the circadian rhythm when exposure takes place in the  
17 evening [19] and/or by causing an immediate activation in itself [11, 20].  
18  
19  
20  
21

22  
23 The relative importance of different devices is still a matter of discussion, although devices  
24 used for social communication have been proposed to have an especially negative effect on  
25 sleep [2]. However, the present study showed few statistical significant differences between  
26 the electronic devices. Further, both multitasking and the multi-functionality (e.g., homework  
27 vs. recreational use) of most platforms suggest that findings concerning the relationship  
28 between sleep and specific electronic devices and their type of use should be carefully  
29 interpreted.  
30  
31  
32  
33  
34

35 The present study found that the associations between electronic media use and sleep were  
36 robust across the included sleep parameters, including SOL, sleep deficiency and sleep  
37 duration, extending on the previous findings on the relationship between electronic media use  
38 and time in bed [9, 10]. The scarcity of similar studies makes the current findings hard to  
39 compare. In the 2010 review it was claimed that two specific studies of adolescents assessed  
40 SOL [5, 21], but after carefully reviewing these papers we did not find support for this. While  
41 the present study found a higher risk of long SOL associated with electronic media use, the  
42 exact cut-offs for long SOL at different developmental levels are not settled. Long SOL is  
43 usually defined as 31 minutes or more in adults [22], but as adolescents may experience  
44 longer SOL due to biologically based delayed circadian rhythms occurring during puberty  
45 [23], we decided to use a cut-off of 60 minutes.  
46  
47  
48  
49  
50  
51  
52

53 Sleep need varies between individuals, and one can argue that adolescents with need of little  
54 sleep may spend more time on electronic devices than individuals with more extensive sleep  
55 needs. The inclusion of perceived sleep need and sleep deficiency defined by subtracting the  
56 actual sleep from their perceived sleep allowed us however to explore this further. A strong  
57  
58  
59  
60

1  
2  
3 relationship between use of electronic devices and subjective sleep deficiency was present ,  
4 thus indicating that use of electronic devices is related to sleeping less than what themselves  
5 and experts deem necessary [23].  
6  
7

8  
9 There are some methodological limitations of the present study that should be noted. First, the  
10 cross-sectional design is prevents us from drawing inferences about directionality. An  
11 indication of a causal relationship is the dose-response relationship between sleep duration  
12 and media use. In terms of a reverse causality, it might be that some adolescents actively use  
13 media and technology as a sleeping aid [24], or to counteract boredom when not being able to  
14 sleep. Most likely the relationship between poor sleep and electronic media use reflects a self-  
15 perpetuating cycle. Second, the sleep measurements were solely based on self-reports, which  
16 renders the results susceptible to influence from the common method bias [25]. Although self-  
17 reported sleep parameters, including SOL and WASO typically differ from those obtained  
18 from objective assessments [26], recent studies have showed that self-report sleep  
19 assessments can be recommended for the characterization of sleep parameters in both clinical  
20 and population-based research [27]. Also, the accuracy of self-reported SOL and WASO are  
21 generally better among adolescents than in older adults [28], and a study of young adolescents  
22 in Hong Kong recently found good agreement between actigraphy measured and  
23 questionnaire reported sleep durations [29]. Third, there may be confounders, variables that  
24 are related to both sleep and media use, that we did not assess, e.g. emotional and behavioral  
25 problems. Further, the clinical significance of the results may be discussed as some of the  
26 increased risks were small in magnitude, and how much added functional significance these  
27 represent needs further exploration. Also, attrition from the study could affect  
28 generalizability, with a response rate of about 53% and with adolescents in schools  
29 overrepresented. The problem with non-participation in survey research seems unfortunately  
30 to be on the rise [30]. Official data show that in 2012, 92% of all adolescents in Norway aged  
31 16-18 attended high school [31], compared to 98% in the current study. Based on previous  
32 research from the former waves of the Bergen Child Study (the same population as the  
33 current study), non-participants have also been shown to have more psychological problems  
34 than participants [32], and it is therefore likely that the prevalence of sleep problems may be  
35 underestimated in the current study. Finally, the cross-sectional design of the study restricts  
36 causal attributions, and prospective studies are still needed to disentangle the temporal  
37 relationship.  
38  
39  
40  
41  
42  
43  
44  
45  
46  
47  
48  
49  
50  
51  
52  
53  
54

55 The assessment method may also have influenced the results. While the daytime screen use  
56 was based on a previous validated instrument [14], the questions used for the assessment of  
57 bedtime use of electronic devices were new. A broader scope compared to most previous  
58  
59  
60

1  
2  
3 studies, including also questions about cell phones and Mp3-players as well as newer  
4 technology such as tablets, is a strength of the present study. Screen time use cannot be  
5 regarded as the absolute time spent in front of a screen, as other platforms may not be  
6 included and there might be an overlap between the daytime and bedtime use.  
7  
8  
9

10  
11 Parallel with the rapid change in technology, the recommendations for healthy media use  
12 given to parents and adolescence also need updating. The current recommendation is not to  
13 have a TV in the bedroom, in accordance with the research status. It seems, however, that  
14 there may be other electronic devices exerting the same negative influence on sleep, such as  
15 PCs and mobile phones. The results confirm recommendations for restricting media use in  
16 general. The combination of secular trends to impaired sleep (see[3] and the established  
17 relationship to health and school achievement [33] underscores the importance of prevention.  
18 The scope of the problem suggests that this reflect a public health issue and that primary  
19 prevention may be needed. Parent-set bedtimes have been shown to be related to good sleep  
20 hygiene in adolescents [34] and an increased parental involvement in technology use could be  
21 a recommendation based on the findings, but this needs further evidence. While technology  
22 use may be a source of sleep deficiency, this may also serve as a medium of intervention, as  
23 internet-based interventions have proven to be effective and cost-efficient modes of treating  
24 sleep problems [35].  
25  
26  
27  
28  
29  
30  
31  
32  
33  
34  
35  
36  
37  
38  
39  
40  
41  
42  
43  
44  
45  
46  
47  
48  
49  
50  
51  
52  
53  
54  
55  
56  
57  
58  
59  
60

## CONTRIBUTORSHIP STATEMENT

Author KM, AJL, RJ and MH were involved in acquisition of data. Authors MH and BS were responsible for conception and design of the study. KM, SP, BS, MH did the analysis and interpretation of data. MH, BS and SP conducted the statistical analysis. MH, BS and SP drafted the manuscript. Authors KM, RJ and AJL gave critical revision of the manuscript for important intellectual content. KM and RJ , obtained funding and KM, RJ and AJL gave materialistic, technical or material support. Authors MH and BS had full access to all the data in the study and takes responsibility for the integrity of the data and the accuracy of the data analysis

## COMPETING INTERESTS

The authors declare that they have no competing interests.

## FUNDING

The youth@hordaland study was funded by Uni Research Health and Norwegian Directorate for Health and Social Affairs.

## DATA SHARING

Data for research projects from the population-based youth@hordaland study may be made available at request from Regional Centre for Child and Youth Mental Health and Child Welfare, Uni Research Health, Bergen, Norway.

## ACKNOWLEDGEMENTS

The authors would like to thank Regional Centre for Child and Youth Mental Health and Child Welfare at Uni Research Health for making the collection of the data, and making the data available for this study. The authors would like to thank the participants for their time and effort.

## REFERENCES

1. National Sleep Foundation: Sleep In America Poll. In: <http://www.sleepfoundation.org/article/sleep-america-polls/2006-teens-and-sleep>. vol. 2006; 2006.
2. Van den Bulck J. Text messaging as a cause of sleep interruption in adolescents, evidence from a cross-sectional study *J Sleep Res* 2003;12:263.
3. Pallesen S, Hetland J, Sivertsen B *et al*. Time trends in sleep-onset difficulties among Norwegian adolescents: 1983--2005 *Scand J Public Health* 2008;36:889-95.
4. Hysing M, Pallesen S, Stormark KM *et al*. Sleep patterns and insomnia among adolescents: a population-based study *J Sleep Res* 2013;22:549-56.
5. Van den Bulck J. The effects of media on sleep *Adolesc Med State Art Rev* 2010;21:418-29, vii.
6. Adam EK, Snell EK, Pendry P. Sleep timing and quantity in ecological and family context: a nationally representative time-diary study *J Fam Psychol* 2007;21:4-19.
7. Thorleifsdottir B, Bjornsson JK, Benediktsdottir B *et al*. Sleep and sleep habits from childhood to young adulthood over a 10-year period *J Psychosom Res* 2002;53:529-37.
8. Dorofaeff TF, Denny S. Sleep and adolescence. Do New Zealand teenagers get enough? *J Paediatr Child Health* 2006;42:515-20.
9. Punamaki RL, Wallenius M, Nygard CH *et al*. Use of information and communication technology (ICT) and perceived health in adolescence: the role of sleeping habits and waking-time tiredness *J Adolesc* 2007;30:569-85.
10. Yen CF, Ko CH, Yen JY *et al*. The multidimensional correlates associated with short nocturnal sleep duration and subjective insomnia among Taiwanese adolescents *Sleep* 2008;31:1515-25.
11. Weaver E, Gradisar M, Dohnt H *et al*. The effect of presleep video-game playing on adolescent sleep *J Clin Sleep Med* 2010;6:184-9.
12. Cain N, Gradisar M. Electronic media use and sleep in school-aged children and adolescents: A review *Sleep Med* 2010;11:735-42.
13. Weissbluth M, Poncher J, Given G *et al*. Sleep duration and television viewing *J Pediatr* 1981;99:486-8.
14. Melkevik O, Torsheim T, Iannotti RJ *et al*. Is spending time in screen-based sedentary behaviors associated with less physical activity: a cross national investigation *The international journal of behavioral nutrition and physical activity* 2010;7:46.

15. Bar-on ME. The effects of television on child health: implications and recommendations *Archives of disease in childhood* 2000;83:289-92.
16. Owens J, Maxim R, McGuinn M *et al*. Television-viewing habits and sleep disturbance in school children *Pediatrics* 1999;104:e27.
17. Alexandru G, Michikazu S, Shimako H *et al*. Epidemiological aspects of self-reported sleep onset latency in Japanese junior high school children *J Sleep Res* 2006;15:266-75.
18. Altman DG, Bland JM. Interaction revisited: the difference between two estimates *Bmj* 2003;326:219.
19. Khalsa SB, Jewett ME, Cajochen C *et al*. A phase response curve to single bright light pulses in human subjects *J Physiol* 2003;549:945-52.
20. Campbell SS, Dijk DJ, Boulos Z *et al*. Light treatment for sleep disorders: consensus report. III. Alerting and activating effects *J Biol Rhythms* 1995;10:129-32.
21. Johnson JG, Cohen P, Kasen S *et al*. Association between television viewing and sleep problems during adolescence and early adulthood *Arch Pediatr Adolesc Med* 2004;158:562-8.
22. Lichstein KL, Durrence HH, Taylor DJ *et al*. Quantitative criteria for insomnia *Behav Res Ther* 2003;41:427-45.
23. Carskadon MA, Harvey K, Duke P *et al*. Pubertal changes in daytime sleepiness *Sleep* 1980;2:453-60.
24. Eggermont S, Van den Bulck J. Nodding off or switching off? The use of popular media as a sleep aid in secondary-school children *J Paediatr Child Health* 2006;42:428-33.
25. Podsakoff PM, MacKenzie SB, Lee JY *et al*. Common method biases in behavioral research: A critical review of the literature and recommended remedies *Journal of Applied Psychology* 2003;88:879-903.
26. Lauderdale DS, Knutson KL, Yan LL *et al*. Self-reported and measured sleep duration: how similar are they? *Epidemiology* 2008;19:838-45.
27. Zinkhan M, Berger K, Hense S *et al*. Agreement of different methods for assessing sleep characteristics: a comparison of two actigraphs, wrist and hip placement, and self-report with polysomnography *Sleep medicine* 2014.
28. Dillon HR, Lichstein KL, Dautovich ND *et al*. Variability in Self-Reported Normal Sleep Across the Adult Age Span *J Gerontol B Psychol Sci Soc Sci* 2014.
29. Kong AP, Wing YK, Choi KC *et al*. Associations of sleep duration with obesity and serum lipid profile in children and adolescents *Sleep medicine* 2011;12:659-65.

- 1  
2  
3 30. Morton SMB, Bandara DK, Robinson EM *et al.* In the 21st Century, what is an  
4 acceptable response rate? *Australian and New Zealand Journal of Public Health*  
5 2012;36:106-8.  
6  
7 31. The Directorate of Integration and Diversity (IMDi): **[Education participation in**  
8 **high schools]**. [http://www.imdi.no/no/Fakta-og-statistikk/Fakta-og-](http://www.imdi.no/no/Fakta-og-statistikk/Fakta-og-statistikk/Utdanning/?tab=chr)  
9 [statistikk/Utdanning/?tab=chr](http://www.imdi.no/no/Fakta-og-statistikk/Fakta-og-statistikk/Utdanning/?tab=chr); 2012.  
10  
11 32. Stormark KM, Heiervang E, Heimann M *et al.* Predicting nonresponse bias from  
12 teacher ratings of mental health problems in primary school children *J Abnorm Child*  
13 *Psychol* 2008;36:411-9.  
14  
15 33. Dewald JF, Meijer AM, Oort FJ *et al.* The influence of sleep quality, sleep duration  
16 and sleepiness on school performance in children and adolescents: A meta-analytic  
17 review *Sleep Med Rev* 2010;14:179-89.  
18  
19 34. Short MA, Gradisar M, Wright H *et al.* Time for bed: parent-set bedtimes associated  
20 with improved sleep and daytime functioning in adolescents *Sleep* 2011;34:797-800.  
21  
22 35. Sivertsen B, Vedaa O, Nordgreen T. The Future of Insomnia Treatment-the  
23 Challenge of Implementation *Sleep* 2013;36:303-4.  
24  
25  
26  
27  
28  
29  
30  
31  
32  
33  
34  
35  
36  
37  
38  
39  
40  
41  
42  
43  
44  
45  
46  
47  
48  
49  
50  
51  
52  
53  
54  
55  
56  
57  
58  
59  
60



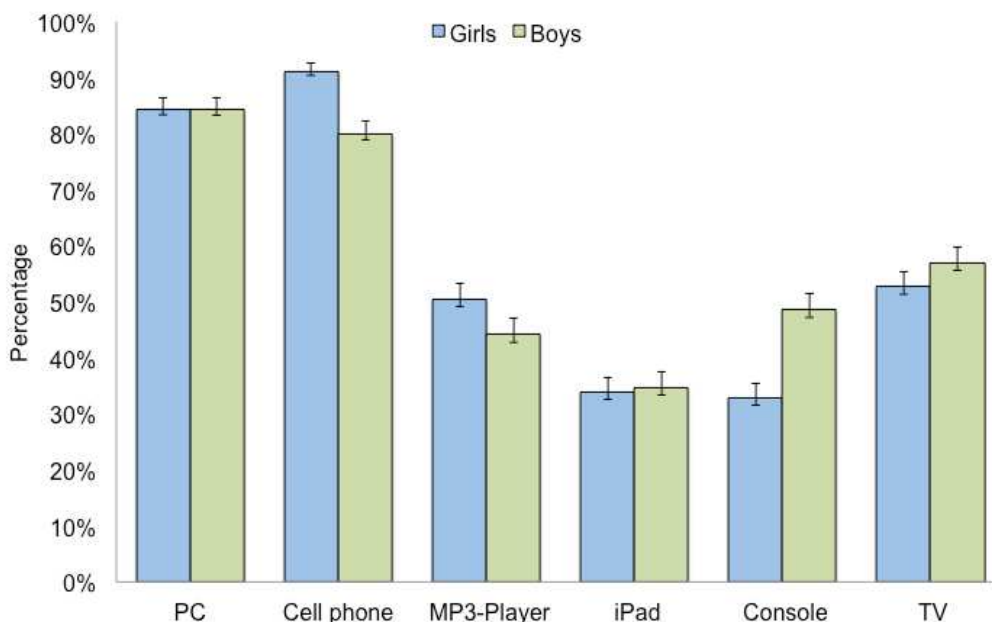

Figure 1: Use of electronic devices during the last hour before bedtime among girls and boys in the youth@hordaland study (n=9846). Error bars represent 95% confidence intervals.

1  
2  
3  
4  
5  
6  
7  
8  
9  
10  
11  
12  
13  
14  
15  
16  
17  
18  
19  
20  
21  
22  
23  
24  
25  
26  
27  
28  
29  
30  
31  
32  
33  
34  
35  
36  
37  
38  
39  
40  
41  
42  
43  
44  
45  
46  
47  
48  
49  
50  
51  
52  
53  
54  
55  
56  
57  
58  
59  
60

1  
2  
3  
4  
5  
6  
7  
8  
9  
10  
11  
12  
13  
14  
15  
16  
17  
18  
19  
20  
21  
22  
23  
24  
25  
26  
27  
28  
29  
30  
31  
32  
33  
34  
35  
36  
37  
38  
39  
40  
41  
42  
43  
44  
45  
46  
47  
48  
49  
50  
51  
52  
53  
54  
55  
56  
57  
58  
59  
60

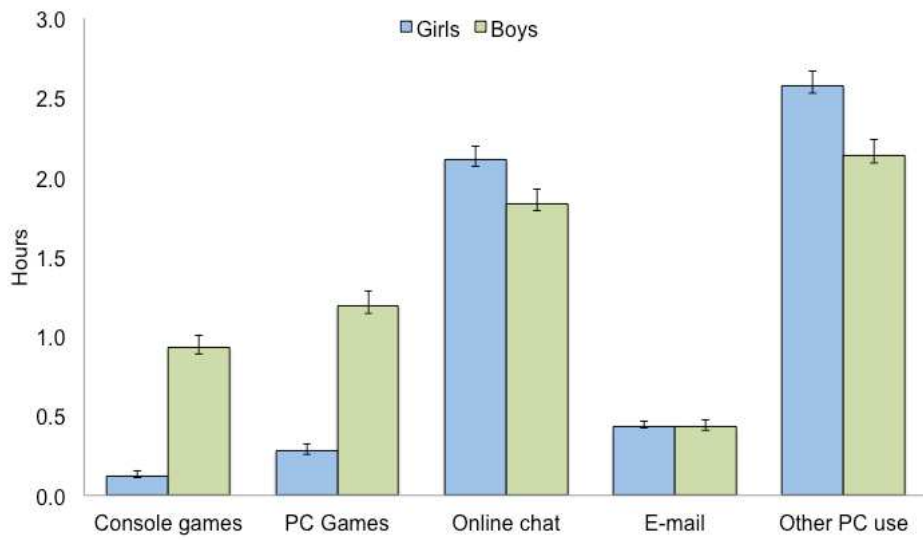

Figure 2: Average daytime screen use among girls and boys in the youth@hordaland study (n=9846). Error bars represent 95% confidence intervals.

Peer review only

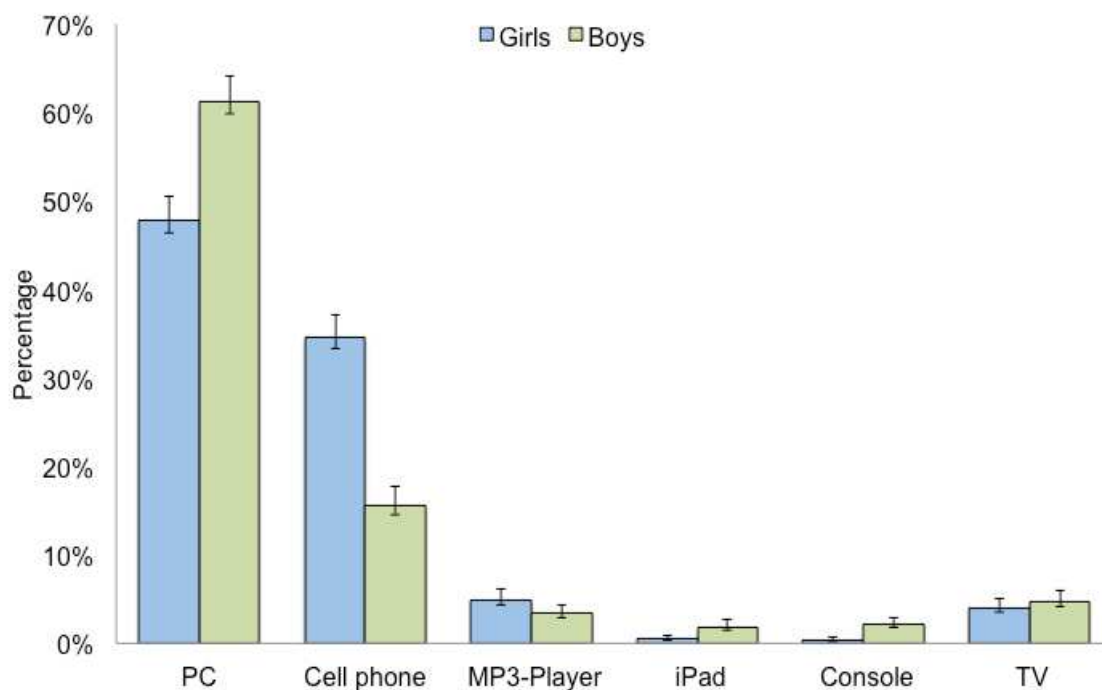

Figure 3: Electronic devices ranked as the most commonly used during the last hour before bedtime among girls and boys in the youth@hordaland study (n=9846). Error bars represent 95% confidence intervals.

1  
2  
3  
4  
5  
6  
7  
8  
9  
10  
11  
12  
13  
14  
15  
16  
17  
18  
19  
20  
21  
22  
23  
24  
25  
26  
27  
28  
29  
30  
31  
32  
33  
34  
35  
36  
37  
38  
39  
40  
41  
42  
43  
44  
45  
46  
47  
48  
49  
50  
51  
52  
53  
54  
55  
56  
57  
58  
59  
60

1  
2  
3  
4  
5  
6  
7  
8  
9  
10  
11  
12  
13  
14  
15  
16  
17  
18  
19  
20  
21  
22  
23  
24  
25  
26  
27  
28  
29  
30  
31  
32  
33  
34  
35  
36  
37  
38  
39  
40  
41  
42  
43  
44  
45  
46  
47  
48  
49  
50  
51  
52  
53  
54  
55  
56  
57  
58  
59  
60

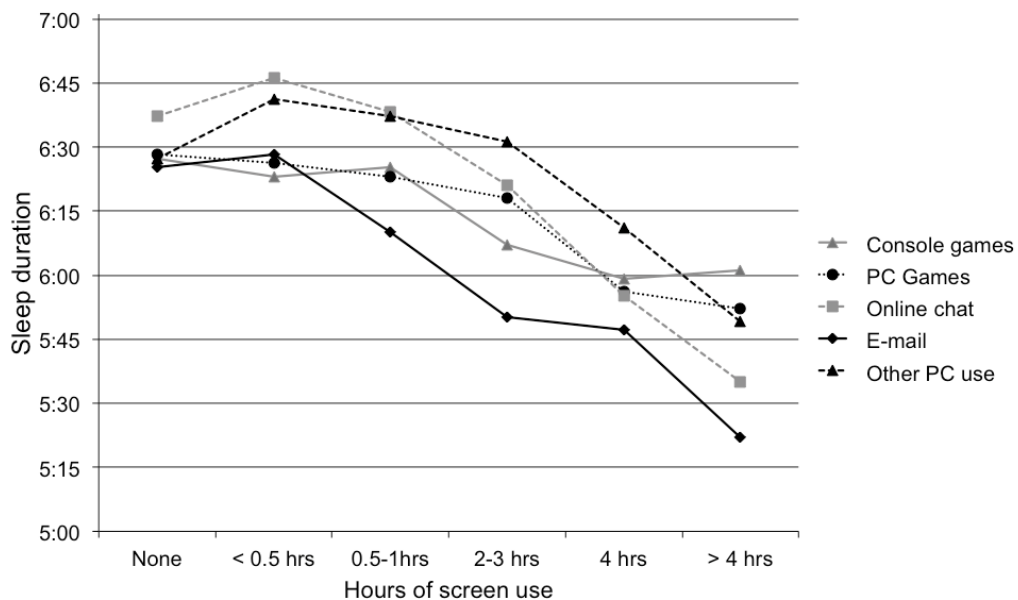

Figure 4: Sleep duration and hours of screen use among adolescents in the youth@hordaland study (n=9846).

Table 1. Use of electronic devices in the last hour before bedtime and daytime screen use as risk factors for sleep onset latency (SOL) of 60 minutes or more and sleep deficiency of 2 hours or more in the youth@hordaland study (n=9846).<sup>§</sup>

|                                                       | SOL (≥60 minutes)   |           | Sleep deficiency (≥2 hours) |           |
|-------------------------------------------------------|---------------------|-----------|-----------------------------|-----------|
|                                                       | OR                  | 95% CI    | OR                          | 95% CI    |
| <b>Electronic devices in last hour before bedtime</b> |                     |           |                             |           |
| PC                                                    | 1.52 <sup>***</sup> | 1.34-1.71 | 1.53 <sup>***</sup>         | 1.34-1.76 |
| Cell phone                                            | 1.48 <sup>***</sup> | 1.30-1.68 | 1.35 <sup>***</sup>         | 1.17-1.55 |
| MP3-Player                                            | 1.36 <sup>***</sup> | 1.25-1.48 | 1.21 <sup>***</sup>         | 1.10-1.32 |
| Tablet                                                | 1.18 <sup>***</sup> | 1.08-1.29 | 1.12 <sup>*</sup>           | 1.02-1.23 |
| Console                                               | 1.13 <sup>***</sup> | 1.04-1.23 | 1.20 <sup>***</sup>         | 1.10-1.32 |
| TV                                                    | 1.19 <sup>***</sup> | 1.10-1.30 | 1.36 <sup>***</sup>         | 1.24-1.49 |
| <b>Daytime screen use</b>                             |                     |           |                             |           |
| Total screen time (4 hours +)                         | 1.49 <sup>***</sup> | 1.36-1.64 | 1.72 <sup>***</sup>         | 1.56-1.89 |
| Console games (2 hours +)                             | 1.20 <sup>*</sup>   | 1.04-1.38 | 1.31 <sup>***</sup>         | 1.13-1.52 |
| PC Games (2 hours +)                                  | 1.19 <sup>**</sup>  | 1.05-1.34 | 1.41 <sup>***</sup>         | 1.25-1.60 |
| Online chat (2 hours +)                               | 1.43 <sup>***</sup> | 1.31-1.56 | 1.87 <sup>***</sup>         | 1.70-2.05 |
| E-mail (2 hours +)                                    | 1.93 <sup>***</sup> | 1.55-2.40 | 1.68 <sup>***</sup>         | 1.31-2.14 |
| Other PC use (2 hours +)                              | 1.38 <sup>***</sup> | 1.26-1.51 | 1.37 <sup>***</sup>         | 1.25-1.51 |

<sup>§</sup> Reference: SOL < 60 minutes  
 p<.05; \*\* p<.01; \*\*\* p<.001;

1  
2  
3  
4  
5  
6  
7  
8  
9  
10  
11  
12  
13  
14  
15  
16  
17  
18  
19  
20  
21  
22  
23  
24  
25  
26  
27  
28  
29  
30  
31  
32  
33  
34  
35  
36  
37  
38  
39  
40  
41  
42  
43  
44  
45  
46  
47  
48  
49

**Table 2.** Use of electronic devices in last hour before bedtime and daytime screen use as risk factors for short sleep duration among girls and boys in the youth@hordaland study (n=9846).<sup>§</sup>

|                                                       | < 5hours            |           | 5-6 hours           |           | 6-7 hours           |           | 7-8 hours           |           |
|-------------------------------------------------------|---------------------|-----------|---------------------|-----------|---------------------|-----------|---------------------|-----------|
|                                                       | OR                  | 95% CI    |
| <b>Electronic devices in last hour before bedtime</b> |                     |           |                     |           |                     |           |                     |           |
| PC                                                    | 2.70 <sup>***</sup> | 2.14-3.39 | 2.69 <sup>***</sup> | 2.09-3.46 | 2.30 <sup>***</sup> | 1.90-2.79 | 1.64 <sup>***</sup> | 1.38-1.96 |
| Cell phone                                            | 1.85 <sup>***</sup> | 1.45-2.35 | 1.65 <sup>***</sup> | 1.28-2.13 | 1.75 <sup>***</sup> | 1.42-2.15 | 1.50 <sup>***</sup> | 1.24-1.83 |
| MP3-Player                                            | 1.52 <sup>***</sup> | 1.29-1.78 | 1.46 <sup>***</sup> | 1.12-1.73 | 1.33 <sup>***</sup> | 1.15-1.53 | 1.19 <sup>*</sup>   | 1.03-1.36 |
| iPad or other tablet                                  | 1.19 <sup>*</sup>   | 1.01-1.41 | 1.29 <sup>**</sup>  | 1.09-1.54 | 1.18 <sup>*</sup>   | 1.92-1.37 | 1.10                | 0.95-1.28 |
| Console                                               | 1.40 <sup>***</sup> | 1.19-1.64 | 1.38 <sup>***</sup> | 1.17-1.64 | 1.27 <sup>**</sup>  | 1.09-1.47 | 1.17 <sup>*</sup>   | 1.01-1.35 |
| TV                                                    | 1.51 <sup>***</sup> | 1.29-1.77 | 1.44 <sup>***</sup> | 1.22-1.71 | 1.35 <sup>***</sup> | 1.17-1.56 | 1.16 <sup>*</sup>   | 1.01-1.33 |
| <b>Daytime screen use</b>                             |                     |           |                     |           |                     |           |                     |           |
| Total screen time (4 hours +)                         | 3.64 <sup>***</sup> | 3.06-4.33 | 2.66 <sup>***</sup> | 2.22-3.19 | 2.07 <sup>***</sup> | 1.79-2.40 | 1.29 <sup>***</sup> | 1.12-1.49 |
| Console games (2 hours +)                             | 2.03 <sup>***</sup> | 1.53-2.69 | 1.73 <sup>***</sup> | 1.28-2.35 | 1.58 <sup>**</sup>  | 1.21-2.06 | 1.20                | 0.92-1.58 |
| PC Games (2 hours +)                                  | 1.90 <sup>***</sup> | 1.51-2.38 | 1.22                | 0.95-1.58 | 1.39 <sup>**</sup>  | 1.12-1.73 | 1.06                | 0.86-1.32 |
| Online chat (2 hours +)                               | 3.58 <sup>***</sup> | 3.03-4.24 | 2.79 <sup>***</sup> | 2.33-3.33 | 1.98 <sup>***</sup> | 1.70-2.30 | 1.31 <sup>***</sup> | 1.13-1.51 |
| E-mail (2 hours +)                                    | 3.28 <sup>***</sup> | 2.07-5.16 | 2.42 <sup>***</sup> | 1.48-3.95 | 1.34                | 0.84-2.14 | 1.14                | 0.72-1.82 |
| Other PC use (2 hours +)                              | 2.06 <sup>***</sup> | 1.74-2.42 | 2.04 <sup>***</sup> | 1.71-2.44 | 1.54 <sup>***</sup> | 1.33-1.78 | 1.21 <sup>**</sup>  | 1.05-1.39 |

<sup>§</sup> Reference: 8-9 hours  
p<.05; \*\* p<.01; \*\*\* p<.001;

**FIGURE LEGENDS**

Figure 1: Use of electronic devices during the last hour before bedtime among girls and boys in the youth@hordaland study (n=9846). Error bars represent 95% confidence intervals.

Figure 2: Average daytime screen use among girls and boys in the youth@hordaland study (n=9846). Error bars represent 95% confidence intervals.

Figure 3: Electronic devices ranked as the most commonly used during the last hour before bedtime among girls and boys in the youth@hordaland study (n=9846). Error bars represent 95% confidence intervals.

Figure 4: Sleep duration and hours of screen use among adolescents in the youth@hordaland study (n=9846).

# BMJ Open

## Sleep and Use of Electronic Devices in Adolescence: Results from a Large Population-Based Study

|                                 |                                                                                                                                                                                                                                                                                                                                                                                                                                                                                                                                                                                                                                             |
|---------------------------------|---------------------------------------------------------------------------------------------------------------------------------------------------------------------------------------------------------------------------------------------------------------------------------------------------------------------------------------------------------------------------------------------------------------------------------------------------------------------------------------------------------------------------------------------------------------------------------------------------------------------------------------------|
| Journal:                        | <i>BMJ Open</i>                                                                                                                                                                                                                                                                                                                                                                                                                                                                                                                                                                                                                             |
| Manuscript ID:                  | bmjopen-2014-006748.R1                                                                                                                                                                                                                                                                                                                                                                                                                                                                                                                                                                                                                      |
| Article Type:                   | Research                                                                                                                                                                                                                                                                                                                                                                                                                                                                                                                                                                                                                                    |
| Date Submitted by the Author:   | 18-Nov-2014                                                                                                                                                                                                                                                                                                                                                                                                                                                                                                                                                                                                                                 |
| Complete List of Authors:       | Hysing, Mari; Uni Research Health, Regional Centre for Child and Youth Mental Health and Child Welfare<br>Pallesen, Staale; University of Bergen, Department of Psychosocial Science<br>Stormark, Kjell Morten; Uni Research Health, Regional Centre for Child and Youth Mental Health and Child Welfare<br>Jakobsen, Reidar; Uni Health, Uni Research, Regional Centre for Child and Youth Mental Health and Child Welfare<br>Lundervold, Astri; University of Bergen, Department of Biological and Medical Psychology<br>Sivertsen, Børge; Norwegian Institute of Public Health, Department of Public Mental Health; Uni Research Health, |
| <b>Primary Subject Heading</b>: | Epidemiology                                                                                                                                                                                                                                                                                                                                                                                                                                                                                                                                                                                                                                |
| Secondary Subject Heading:      | Mental health                                                                                                                                                                                                                                                                                                                                                                                                                                                                                                                                                                                                                               |
| Keywords:                       | sleep, media use, Epidemiology < TROPICAL MEDICINE, adolescents                                                                                                                                                                                                                                                                                                                                                                                                                                                                                                                                                                             |
|                                 |                                                                                                                                                                                                                                                                                                                                                                                                                                                                                                                                                                                                                                             |

SCHOLARONE™  
Manuscripts

only



# Sleep and Use of Electronic Devices in Adolescence: Results from a Large Population-Based Study

Mari Hysing PhD<sup>a</sup>, Ståle Pallesen PhD<sup>b,c</sup>, Kjell Morten Stormark PhD<sup>a</sup>,  
Reidar Jakobsen PhD<sup>a</sup>, Astri J. Lundervold PhD<sup>a,d</sup>, Børge Sivertsen PhD<sup>e,f,g</sup>

- a) Regional Centre for Child and Youth Mental Health and Child Welfare, Uni Research Health, Bergen, P.O.Box 7810, N-5020 Bergen, Norway
- b) Department of Psychosocial Science, University of Bergen, N-5015 Bergen, Norway.
- c) Norwegian Competence Center for Sleep Disorders, Haukeland University Hospital, Jonas Lies vei 65, 5021 Bergen, Norway
- d) Department of Biological and Medical Psychology, University of Bergen, Jonas Lies vei 91, 5009 Bergen, Norway
- e) Division of Mental Health, Norwegian Institute of Public Health, Kalfarveien 31, 5018 Bergen, Norway
- f) Uni Research Health Bergen, P.O.Box 7810, N-5020 Bergen, Norway
- g) Department of Psychiatry, Helse Fonna HF, P.O.Box 2170, N-5504 Haugesund, Norway

**Corresponding author:** Dr. Mari Hysing, Regional Centre for Child and Youth Mental Health and Child Welfare, Postboks 7810, 5020 Bergen, Norway, Email: [mari.hysing@uni.no](mailto:mari.hysing@uni.no); Phone: +47 55 58 86 98

**Running title:** Sleep in the digital adolescent

**Keywords:** sleep; media use; epidemiology; adolescents

Total page count: 20

Word count for abstract: 250 (max 300)

Word count for body text: 3,615 (max 4000)

Number of tables: 2

Number of figures: 3

## ABSTRACT

**Objectives:** Adolescents spend increasingly more time on electronic devices, and sleep deficiency rising in adolescents constitutes a major public health concern. The aim of the present study was to investigate daytime screen use and use of electronic devices before bedtime in relation to sleep.

**Design:** A large cross-sectional population-based survey study from 2012, the youth@hordaland study, in Hordaland County in Norway.

**Setting:** Cross-sectional general community-based study.

**Participants:** 9,846 adolescents from three age cohorts aged 16-19. The main independent variables were type and frequency of electronic devices at bedtime and hours of screen-time during leisure time.

**Outcomes:** Sleep variables calculated based on self-report including bedtime, rise time, time in bed, sleep duration, sleep onset latency and wake after sleep onset.

**Results:** Adolescents spent a large amount of time during the day and at bedtime using electronic devices. Both day- and bedtime use of electronic devices were related to sleep measures, with an increased risk of short sleep duration, long sleep onset latency and increased sleep deficiency. A dose-response relationship emerged between sleep duration and use of electronic devices, exemplified by the association between PC use and risk of less than five hours of sleep (OR=2.70, CI95% 2.14-3.39), and a comparable lower odds for 7-8 hours of sleep (OR=1.64, CI95% 1.38-1.96).

**Conclusions:** Use of electronic devices is frequent in adolescence, both during the day and at bedtime. The results demonstrate a negative relation between use of technology and sleep, suggesting that recommendations on healthy media use could include restrictions on electronic devices.

## STRENGTHS AND LIMITATIONS OF THIS STUDY

- This study employed a large well-defined population-based sample of adolescents.
- The data employed in this study is from a recent data collection.
- This study included several detailed measures of sleep patterns and sleep problems, as well as detailed measures of media use.
- The cross-sectional design of this study precluded any causal inference.
- This sample had a limited age-range.

## BACKGROUND

In the last decade we have witnessed a sharp increase in the availability and use of electronic devices such as smart phones, video game consoles, television, audio players, computers and tablets. Due to this, electronic devices have become an integral part of adolescent life, as exemplified by almost all American adolescents (97%) reporting to have at least one electronic media device in their bedroom [1]. In addition to the entertaining aspects, electronic devices play an important part in the social lives of adolescents. The constant change towards a more active, stimulating and social media use may however affect sleep in a negative way [2].

Parallel with the increased use of electronic devices, there has been a shift towards poorer sleep over the past decades among adolescents [3]. Recent epidemiological data on adolescent sleep shows that it on average is characterized by late bedtime, long sleep onset latency (SOL) and a short sleep duration of approximately 6 ½ hours on weekdays contributing to a daily sleep deficiency of about two hours [4].

The high rate of media use in adolescence may be one factor that is related to the short sleep duration and late bedtimes. TV use has consistently and inversely been associated with sleep duration [5, 6], as well as delayed bedtime and wake-up time in adolescents [7]. A high level of computer use has been found to be related to sleep problems [8], reduced time in bed [9, 10] and increased sleep onset latency [11]. Overall, electronic media use has been consistently linked with delayed bedtime and shortened sleep according to a review of the literature. However, some shortcomings in the existing literature were noted in the review. Future studies were recommended to measure sleep by self-report estimates of sleep parameters such as bedtime, sleep onset latency, time spent awake after sleep onset, wake-up time, and rise time, each estimated separately for weekdays and weekend days [12]. Newer technology, such as portable electronic devices has also been recommended to be included in future studies on this topic. Related to this, many of the previous studies have restricted their investigation to only one or two electronic devices [2, 10, 13]. Whether the same pattern of sleep problems is present across type of electronic devices is thus uncertain.

The mechanisms behind the relationships between use of electronic media devices and sleep problems are not well established, but a theoretical model of the relationship has been proposed [12], suggesting several possible mechanisms. According to this model, media use may directly affect sleep by replacing it due to its time consuming nature, or it may interfere with sleep through increased psychophysiological arousal caused by the stimulating content of the material, or through bright light exposure inherent in most electronic media devices

1  
2  
3 [12]. Bright light may impact sleep in two ways; by delaying the circadian rhythm when  
4 exposure takes place in the evening [14] and also by causing an immediate activation in itself  
5 [11, 15]. According to the aforementioned model sleep may also be negatively impacted by  
6 electromagnetic radiation [12]. Another proposed mechanism by which electronic media may  
7 impair sleep relates to physical discomfort, such as muscular pain and headache which can be  
8 caused by prolonged media use (e.g., computer games) [16]. Furthermore, repeated use of  
9 electronic media in the bed or in the bedroom can reduce the sleep inducing properties of the  
10 two latter, as the bed and bedroom become associated with electronic media use [17].  
11  
12  
13  
14  
15

16  
17 The present cross-sectional study will expand on the previous studies by taking a broad  
18 approach including measures of sleep duration, sleep onset latency, and sleep deficiency as  
19 well as including newer technological devices. Based on the presented literature on  
20 adolescent media use, we expected that the majority of adolescents would use electronic  
21 media devices at bedtime. Further, electronic media use was expected to be inversely related  
22 to sleep duration and positively related to sleep onset latency and sleep deficiency. Finally,  
23 we expected the association between sleep and media use to be similar across all  
24 devices/platforms.  
25  
26  
27  
28  
29  
30  
31

## 32 **METHODS**

### 33 **Study population**

34  
35 In this cross-sectional population-based study, we used data from the youth@hordaland  
36 survey of adolescents in the county of Hordaland in Western Norway. All adolescent born  
37 between 1993 and 1995 and all students attending secondary education during spring 2012  
38 were invited. The main aim of the survey was to assess prevalence of mental health problems  
39 and service use in adolescents. Data were collected during spring 2012. Adolescents in  
40 secondary education received information per e-mail, and time during regular school hours  
41 was allocated for them to complete the questionnaire. The questionnaire was web-based, and  
42 a teacher was present to organize the data collection and to ensure confidentiality. Survey  
43 staff was available on a phone number for both the adolescents and school personnel for  
44 answering queries. Those not in school received information and the questionnaire package  
45 by postal mail to their home addresses, and were provided with a prepaid envelope for  
46 returning of the questionnaires.  
47  
48  
49  
50  
51  
52  
53  
54  
55  
56  
57  
58  
59  
60

### Sample

A total of 19430 adolescents born between 1993 and 1995 were invited to participate, of which 10220 agreed, yielding a participation rate of 53%. The mean age of those participating was 17 years, and the sample included more girls (53.5% / n=5252) than boys (46.5% / n=4594). The majority (97.9% / n=9219) were high school students.

Sleep variables were checked for validity of answers, resulting in data from 374 subjects being excluded due to obvious invalid responses. For example, when calculating sleep duration and sleep efficiency, individuals with negative values on these computed variables were excluded from further the analyses. Thus, the total sample size in the current study was 9875.

### Instruments

#### *Use of electronic devices at bedtime*

Adolescents reported use of six different electronic media devices and if they used them in the bedroom the last hour before they went to sleep. The phrasing of the question was: "How many of the listed electronic devices do you use in your bedroom the last hour before going to bed?" Drag and drop function was incorporated as a feature of the web-based questionnaire. An image with corresponding description of the device was dragged and dropped to indicate use, and ranked by frequency of use with the most frequently used device in the top box etc. The indicated devices comprised PC, cell phone, MP3 player, tablet, game console and TV. No time-frame was available for the ratings.

#### *Screen time during daytime*

Time spent on screen-based activity was assessed by the following question: "Outside of school hours how much time do you usually spend on the following on weekdays 1) TV-games (PlayStation, Xbox, Wii etc.), 2) PC games, 3) Internet chatting, 4) writing and reading emails, 5) using the PC for other purposes?" The responses alternatives were: "no time", "less than ½ hour", "½ hour to 1 hour", "2-3 hours", "4 hours" and "more than 4 hours". A similar question has been used in the Health Behaviour in School-aged Children (HBSC) studies [18]. A 2 hour cut-off was used as most recommendations for screen-based activities restrict this to about 2 hours per day and this cut-off has also been used in previous relevant studies [19][20, 21]

#### *Sleep variables*

The adolescents' typical bedtime and rise time were indicated in hours and minutes using a scroll down menu with five minutes intervals and were reported separately for weekend and

1  
2  
3 weekdays. Time in bed (TIB) was calculated by subtracting bedtime from rise time. Typical  
4 sleep onset latency (SOL) and wake after sleep onset (WASO) were indicated in hours and  
5 minutes using a scroll down menu with five minutes intervals, and sleep duration was defined  
6 as TIB minus SOL and WASO. Sleep duration was split into 10 categories, and SOL was  
7 categorized as either more or less than 60 minutes. Subjective sleep need (each individual's  
8 own perceived sleep need) was reported in hours and minutes on a scroll down menu with  
9 five minutes intervals, and the phrasing of the question was "How much sleep do you need to  
10 feel rested?" Sleep deficiency was calculated separately for weekends and weekdays,  
11 subtracting total sleep duration from subjective sleep need. Weekday sleep deficiency is used  
12 in the present study, and was dichotomized into  $<2$  hours and  $\geq 2$  hours.  
13  
14  
15  
16  
17  
18  
19  
20

### 21 **Statistics**

22 IBM SPSS Statistics 22 for Windows (SPSS Inc., Chicago, Ill) was used for all analyses. Chi-  
23 square tests were used to examine gender differences in use of electronic devices and daytime  
24 screen use. Independent sample t-tests and chi-square tests were used to examine the  
25 associations between sleep duration, electronic devices and daytime screen use. Logistic  
26 regression analyses using SOL of more than 60 minutes and sleep deficiency as outcome  
27 variables were conducted for all electronic devices and daytime screen (exposure variables).  
28 Multinomial logistic regression analyses were conducted with short sleep duration as the  
29 outcome variable (8-9 hours as the reference category) and electronic devices and daytime  
30 screen as the exposure variables. To investigate whether odds-ratios differed significantly  
31 between genders, we calculated the relative risk ratio (RRR) [22]. As these analyses yielded  
32 no significant gender differences, the results of the logistic regressions are presented without  
33 gender stratification.  
34  
35  
36  
37  
38  
39  
40  
41  
42  
43

### 44 **Ethics**

45  
46 The study was approved by the Regional Committee for Medical and Health Research Ethics  
47 (REC) in Western Norway. In accordance with the regulations from the REC and Norwegian  
48 health authorities, adolescents aged 16 years and older can make decisions regarding their  
49 own health, and may thus give consent themselves to participate in health studies.  
50

51 Parents/guardians have the right to be informed, and in the current study, all  
52 parents/guardians received written information about the study in advance. If the adolescents  
53 decided to participate they indicated if they wanted to participate in the study as a whole, or  
54 they could choose three options to specify their level of consent: 1) to complete the  
55  
56  
57  
58  
59  
60

questionnaire, 2) obtain information from parent questionnaire 3) linking data to national registries.

## RESULTS

### Use of electronic devices before bedtime and daytime screen time

The use of electronic devices stratified by gender is shown in Figure 1. Most adolescents used an electronic device in the hour before bedtime. Some gender differences emerged, with more boys using game consoles, whereas girls reported higher use of cell phones and Mp3 players ( $P_s < .001$ ).

-----  
Please insert Figure 1 about here  
-----

The average number of hours of screen time stratified by gender is presented in Figure 2. Girls reported significantly more online chatting and other PC use, while boys reported more console games and PC games (all  $P_s < .001$ ).

-----  
Please insert Figure 2 about here  
-----

### Electronic devices at bedtime and daytime screen use in relation to long sleep onset latency

The odds ratios for reporting SOL of more than 60 minutes were calculated separately for each electronic device (Table 1). Use of PC, cell phone, Mp3-player, tablet, game console and TV were all associated with increased odds of SOL of more than 60 minutes.

Daytime screen use showed the same pattern. A total screen time after school hours for more than four hours was related to long SOL (OR: 1.49, CI95% 1.36-1.64). When analyses were conducted separately for each electronic device, all daytime screen use over two hours was significantly associated with long SOL (see Table 1).

### **Electronic devices at bedtime and daytime screen use in relation to sleep deficiency**

The odds for sleep deficiency of more than two hours were calculated separately for each electronic device (Table 1). Use of PC, cell phone, Mp3-player, game console and TV in the hour before bedtime were all associated with increased odds of sleep deficiency.

Total daytime screen use after school of more than four hours was positively related to sleep deficiency. When analyses were conducted separately for different electronic devices, all daytime screen use over two hours were significantly associated with sleep deficiency.

-----  
Please insert Table 1 about here  
-----

### **Electronic devices at bedtime and daytime screen use in relation to sleep duration**

Hours of daytime screen use are presented in Figure 3. The odds for reporting short sleep duration (covering 4 different categories), with 8-9 hours as the reference category, was calculated separately for each electronic device (Table 2). A dose-response relationship emerged with the highest risk of short sleep duration under five hours, exemplified by the association between PC use and risk of less than five hours of sleep (OR: 2.70 CI95% 2.14-3.39), while the risk for 7-8 hours of sleep equaled an OR=1.64 (CI95% 1.38-1.96).

-----  
Please insert Figure 3 and Table 2 about here  
-----

Daytime screen use showed a similar pattern. Total screen time above 4 hours was associated with an increased risk of less than five hours of sleep (OR: 3.64 CI95% 3.06-4.33), while the risk for 7-8 hours of sleep was OR=1.29 (CI95% 1.12-1.49). See Table 2 for details.

### **Multitasking of electronic devices at bedtime**

The risk of SOL of more than 60 minutes was increased in adolescents using 4 devices or more compared to adolescents using only one device (OR=1.26 (95% CI 1.07-1.49)). The ORs for sleep deficiency for multitasking 2-3 devices was 1.50 (95% CI 1.26-1.79) and 4 or more devices 1.75 (95% CI 1.46-2.08), in comparison to using only one device. The ORs for sleeping less than 5 hours among multitasking teens ranged from 2.2 to 2.8 (depending on number of used devices) compared to only one device. The corresponding OR-ranges for



1  
2  
3 sleeping 5-6 hour, 6-7 hours and 7-8 hours were 1.8-2.4, 1.9-2.1, and 1.4-1.5 respectively (all  
4  $P_s < .001$  compared to sleeping 8-9 hours).  
5  
6  
7  
8  
9

## 10 **DISCUSSION**

11  
12  
13  
14 In short, almost all adolescents reported using one or more electronic devices during the last  
15 hour before bedtime. Extensive use of these devices was significantly and positively  
16 associated with SOL and sleep deficiency, with an inverse dose-response relationship  
17 between sleep duration and media use.  
18  
19

20  
21 The present study adds to the literature by showing that both day- and bedtime use of  
22 electronic devices across a range of platforms, including newer technology, are related to  
23 several sleep parameters. While the frequency of use differed between the various devices,  
24 the relation between different types of electronic devices and sleep remained significant. This  
25 suggests that the established relationship between TV and sleep found in previous studies [5,  
26 6] can be generalized to newer technology. The relation between sleep and PC-use that has  
27 been demonstrated in previous studies in relation to poor sleep [8] and reduced time in bed [9,  
28 10], was further corroborated by the results of the present study as PC was both one of the  
29 most frequently used platforms and showed also the highest risks for short sleep duration and  
30 sleep deficiency. Using multiple devices before bedtime was related to longer SOL and  
31 shorter sleep duration compared to using only one electronic device.  
32  
33  
34  
35  
36  
37  
38

39  
40 There are probably multiple pathways explaining the associations between sleep and  
41 electronic devices. Media use may directly affect sleep by replacing it due to its time  
42 consuming nature, or may interfere with sleep through increased psychophysiological arousal.  
43 Alternatively, the bright light exposure inherent in most electronic media devices [12] may  
44 interfere with sleep by delaying the circadian rhythm when exposure takes place in the  
45 evening [14] and/or by causing an immediate activation in itself [11, 15].  
46  
47  
48  
49

50  
51 The relative importance of different devices is still a matter of discussion, although devices  
52 used for social communication have been proposed to have an especially negative effect on  
53 sleep [2]. However, the present study showed few statistical significant differences between  
54 the electronic devices. Further, both multitasking and the multi-functionality (e.g., homework  
55 vs. recreational use) of most platforms suggest that findings concerning the relationship  
56 between sleep and specific electronic devices and their type of use should be carefully  
57  
58  
59  
60

1  
2  
3 interpreted.

4  
5  
6 The present study found that the associations between electronic media use and sleep were  
7 robust across the included sleep parameters, including SOL, sleep deficiency and sleep  
8 duration, extending on the previous findings on the relationship between electronic media use  
9 and time in bed [9, 10]. The scarcity of similar studies makes the current findings hard to  
10 compare. In the 2010 review it was reported that two studies of adolescents assessed SOL [5,  
11 23], but after carefully reviewing these papers we could not find support for this. While the  
12 present study found a higher risk of long SOL associated with electronic media use, the exact  
13 cut-offs for long SOL at different developmental levels are not settled. Long SOL is usually  
14 defined as 31 minutes or more in adults [24], but as adolescents may experience longer SOL  
15 due to biologically based delayed circadian rhythms occurring during puberty [25], we  
16 decided to use a cut-off of 60 minutes.  
17  
18  
19  
20  
21  
22  
23

24 Sleep need varies between individuals, and one can argue that adolescents with less need of  
25 sleep may spend more time on electronic devices than individuals with more extensive sleep  
26 needs. The inclusion of perceived sleep need and sleep deficiency defined by subtracting the  
27 actual sleep from their perceived sleep allowed us to explore this further. In the current study,  
28 a sleep duration of 8-9 hours was chosen as the reference category for all regression analyses,  
29 as this was the average sleep need reported by the adolescents [4], and also because this  
30 corresponds well with experts' recommended sleep need in this age group [25]. A strong  
31 relationship between use of electronic devices and subjective sleep deficiency was present,  
32 thus indicating that use of electronic devices is related to sleeping less than what themselves  
33 and experts deem necessary [25].  
34  
35  
36  
37  
38  
39  
40

41 There are some methodological limitations of the present study that should be noted. First, the  
42 cross-sectional design prevents us from drawing inferences about directionality. An indication  
43 of a causal relationship is the dose-response relationship between sleep duration and media  
44 use. In terms of a reverse causality, it might be that some adolescents actively use media and  
45 technology as a sleeping aid [26], or to counteract boredom when not being able to sleep.  
46 Most likely the relationship between poor sleep and electronic media use reflects a self-  
47 perpetuating cycle. Second, the phrasing of the questions assessing daytime and bedtime use  
48 of electronic devices does not rule out some overlap between the two items. For example,  
49 when adolescents report a total screen time use of 6+ hours, it is not unlikely that some  
50 adolescents include the last hour before going to bed. Along the same lines, we had no  
51 information on the purpose of the screen time use, and as such we were not able to single out  
52 school-related work. In addition it cannot be ruled out that some adolescents multitask and  
53  
54  
55  
56  
57  
58  
59  
60

1  
2  
3 use electronic media in parallel with other activities. Third, the sleep measurements were  
4 solely based on self-reports, which renders the results susceptible to influence from the  
5 common method bias [27]. Although self-reported sleep parameters, including SOL and  
6 WASO typically differ from those obtained from objective assessments [28], recent studies  
7 have showed that self-report sleep assessments can be recommended for the characterization  
8 of sleep parameters in both clinical and population-based research [29]. Also, the accuracy of  
9 self-reported SOL and WASO are generally better among adolescents than in older adults  
10 [30], and a study of young adolescents in Hong Kong recently found good agreement between  
11 actigraphy measured and questionnaire reported sleep durations [31]. Fourth, there may be  
12 confounders, variables that are related to both sleep and media use, that were not assessed,  
13 e.g. emotional and behavioral problems. Further, the clinical significance of the results may  
14 be discussed as some of the increased risks were small in magnitude, and how much added  
15 functional significance these represent needs further exploration. Also, attrition from the  
16 study could affect generalizability, with a response rate of about 53% and with adolescents in  
17 schools overrepresented. The problem with non-participation in survey research seems  
18 unfortunately to be on the rise [32]. Official data show that in 2012, 92% of all adolescents in  
19 Norway aged 16-18 attended high school [33], compared to 98% in the current study. Based  
20 on previous research from the former waves of the Bergen Child Study (the same population  
21 as the current study), non-participants had more emotional and behavioural problems, albeit  
22 small in magnitude, in comparison the participants. [34]. It is therefore likely that the  
23 prevalence of sleep problems may be underestimated in the current study. Finally, the cross-  
24 sectional design of the study restricts causal attributions, and prospective studies are still  
25 needed to disentangle the temporal relationship.

26  
27  
28  
29  
30  
31  
32  
33  
34  
35  
36  
37  
38  
39  
40  
41 The assessment method may also have influenced the results. While the daytime screen use  
42 was based on a previous validated instrument [18], the questions used for the assessment of  
43 bedtime use of electronic devices were new. A broader scope compared to most previous  
44 studies, including questions about cell phones and Mp3-players as well as newer technology  
45 such as tablets, is a strength of the present study. Screen time use cannot be regarded as the  
46 absolute time spent in front of a screen, as other platforms may not be included and there  
47 might be an overlap between the daytime and bedtime use.

48  
49  
50  
51  
52  
53  
54  
55  
56  
57  
58  
59  
60  
Parallel with the rapid change in technology, the recommendations for healthy media use  
given to parents and adolescence also need updating, and age-specific guidelines regarding  
the quantity and timing of electronic media use should be developed and made known to the  
public [12]. The current recommendation is not to have a TV in the bedroom [35]. It seems,  
however, that there may be other electronic devices exerting the same negative influence on

1  
2  
3 sleep, such as PCs and mobile phones. The results confirm recommendations for restricting  
4 media use in general. The combination of secular trends to impaired sleep (see[3] and the  
5 established relationship to health and school achievement [36] underscore the importance of  
6 prevention. The scope of the problem suggests that this is a public health issue and that  
7 primary prevention may be needed. Parent-set bedtimes have been shown to be related to  
8 good sleep hygiene in adolescents [37] and an increased parental involvement in technology  
9 use could be a recommendation based on the findings, but this needs further evidence. While  
10 technology use may be a source of sleep deficiency, this may also serve as a medium of  
11 intervention, as internet-based interventions have proven to be effective and cost-efficient  
12 modes of treating sleep problems [38].  
13  
14  
15  
16  
17  
18  
19  
20  
21  
22  
23  
24  
25  
26  
27  
28  
29  
30  
31  
32  
33  
34  
35  
36  
37  
38  
39  
40  
41  
42  
43  
44  
45  
46  
47  
48  
49  
50  
51  
52  
53  
54  
55  
56  
57  
58  
59  
60

**CONTRIBUTORSHIP STATEMENT**

Author KM, AJL, RJ and MH were involved in acquisition of data. Authors MH and BS were responsible for conception and design of the study. BS and MH did the analysis and interpretation of data. MH, BS and SP drafted the manuscript. Authors KM, RJ and AJL gave critical revision of the manuscript for important intellectual content. KM and RJ obtained funding, and KM, RJ and AJL gave materialistic, technical or material support. Authors MH and BS had full access to all the data in the study and takes responsibility for the integrity of the data and the accuracy of the data analysis.

**COMPETING INTERESTS**

The authors declare that they have no competing interests.

**FUNDING**

The youth@hordaland study was funded by Uni Research Health and Norwegian Directorate for Health and Social Affairs.

**DATA SHARING**

Data for research projects from the population-based youth@hordaland study may be made available at request from Regional Centre for Child and Youth Mental Health and Child Welfare, Uni Research Health, Bergen, Norway.

**ACKNOWLEDGEMENTS**

The authors would like to thank Regional Centre for Child and Youth Mental Health and Child Welfare at Uni Research Health for making the collection of the data, and making the data available for this study. The authors would like to thank the participants for their time and effort.

## REFERENCES

1. National Sleep Foundation: **Sleep In America Poll**. In: <http://www.sleepfoundation.org/article/sleep-america-polls/2006-teens-and-sleep>. vol. 2006; 2006.
2. Van den Bulck J. Text messaging as a cause of sleep interruption in adolescents, evidence from a cross-sectional study *J Sleep Res* 2003;12:263.
3. Pallesen S, Hetland J, Sivertsen B *et al*. Time trends in sleep-onset difficulties among Norwegian adolescents: 1983--2005 *Scand J Public Health* 2008;36:889-95.
4. Hysing M, Pallesen S, Stormark KM *et al*. Sleep patterns and insomnia among adolescents: a population-based study *Journal of sleep research* 2013;22:549-56.
5. Van den Bulck J. The effects of media on sleep *Adolesc Med State Art Rev* 2010;21:418-29, vii.
6. Adam EK, Snell EK, Pendry P. Sleep timing and quantity in ecological and family context: a nationally representative time-diary study *J Fam Psychol* 2007;21:4-19.
7. Thorleifsdottir B, Bjornsson JK, Benediktsdottir B *et al*. Sleep and sleep habits from childhood to young adulthood over a 10-year period *J Psychosom Res* 2002;53:529-37.
8. Dorofaeff TF, Denny S. Sleep and adolescence. Do New Zealand teenagers get enough? *J Paediatr Child Health* 2006;42:515-20.
9. Punamaki RL, Wallenius M, Nygard CH *et al*. Use of information and communication technology (ICT) and perceived health in adolescence: the role of sleeping habits and waking-time tiredness *J Adolesc* 2007;30:569-85.
10. Yen CF, Ko CH, Yen JY *et al*. The multidimensional correlates associated with short nocturnal sleep duration and subjective insomnia among Taiwanese adolescents *Sleep* 2008;31:1515-25.
11. Weaver E, Gradisar M, Dohnt H *et al*. The effect of presleep video-game playing on adolescent sleep *J Clin Sleep Med* 2010;6:184-9.
12. Cain N, Gradisar M. Electronic media use and sleep in school-aged children and adolescents: A review *Sleep Med* 2010;11:735-42.
13. Weissbluth M, Poncher J, Given G *et al*. Sleep duration and television viewing *J Pediatr* 1981;99:486-8.
14. Khalsa SB, Jewett ME, Cajochen C *et al*. A phase response curve to single bright light pulses in human subjects *J Physiol* 2003;549:945-52.
15. Campbell SS, Dijk DJ, Boulos Z *et al*. Light treatment for sleep disorders: consensus report. III. Alerting and activating effects *J Biol Rhythms* 1995;10:129-32.

16. Thomee S, Dellve L, Harenstam A *et al.* Perceived connections between information and communication technology use and mental symptoms among young adults - a qualitative study *BMC Public Health* 2010;10:66.
17. Hauri P, Fisher J. Persistent psychophysiological (learned) insomnia *Sleep* 1986;9:38-53.
18. Melkevik O, Torsheim T, Iannotti RJ *et al.* Is spending time in screen-based sedentary behaviors associated with less physical activity: a cross national investigation *The international journal of behavioral nutrition and physical activity* 2010;7:46.
19. Bar-on ME. The effects of television on child health: implications and recommendations *Archives of disease in childhood* 2000;83:289-92.
20. Owens J, Maxim R, McGuinn M *et al.* Television-viewing habits and sleep disturbance in school children *Pediatrics* 1999;104:e27.
21. Alexandru G, Michikazu S, Shimako H *et al.* Epidemiological aspects of self-reported sleep onset latency in Japanese junior high school children *J Sleep Res* 2006;15:266-75.
22. Altman DG, Bland JM. Interaction revisited: the difference between two estimates *Bmj* 2003;326:219.
23. Johnson JG, Cohen P, Kasen S *et al.* Association between television viewing and sleep problems during adolescence and early adulthood *Arch Pediatr Adolesc Med* 2004;158:562-8.
24. Lichstein KL, Durrence HH, Taylor DJ *et al.* Quantitative criteria for insomnia *Behav Res Ther* 2003;41:427-45.
25. Carskadon MA, Harvey K, Duke P *et al.* Pubertal changes in daytime sleepiness *Sleep* 1980;2:453-60.
26. Eggermont S, Van den Bulck J. Nodding off or switching off? The use of popular media as a sleep aid in secondary-school children *J Paediatr Child Health* 2006;42:428-33.
27. Podsakoff PM, MacKenzie SB, Lee JY *et al.* Common method biases in behavioral research: A critical review of the literature and recommended remedies *Journal of Applied Psychology* 2003;88:879-903.
28. Lauderdale DS, Knutson KL, Yan LL *et al.* Self-reported and measured sleep duration: how similar are they? *Epidemiology* 2008;19:838-45.
29. Zinkhan M, Berger K, Hense S *et al.* Agreement of different methods for assessing sleep characteristics: a comparison of two actigraphs, wrist and hip placement, and self-report with polysomnography *Sleep medicine* 2014.

- 1  
2  
3  
4  
5  
6  
7  
8  
9  
10  
11  
12  
13  
14  
15  
16  
17  
18  
19  
20  
21  
22  
23  
24  
25  
26  
27  
28  
29  
30  
31  
32  
33  
34  
35  
36  
37  
38  
39  
40  
41  
42  
43  
44  
45  
46  
47  
48  
49  
50  
51  
52  
53  
54  
55  
56  
57  
58  
59  
60
30. Dillon HR, Lichstein KL, Dautovich ND *et al.* Variability in self-reported normal sleep across the adult age span *J Gerontol B Psychol Sci Soc Sci* 2014.
  31. Kong AP, Wing YK, Choi KC *et al.* Associations of sleep duration with obesity and serum lipid profile in children and adolescents *Sleep medicine* 2011;12:659-65.
  32. Morton SMB, Bandara DK, Robinson EM *et al.* In the 21st Century, what is an acceptable response rate? *Aust Nz J Publ Heal* 2012;36:106-8.
  33. The Directorate of Integration and Diversity (IMDi): **[Education participation in high schools]**. <http://www.imdi.no/no/Fakta-og-statistikk/Fakta-og-statistikk/Utdanning/?tab=chr>; 2012.
  34. Stormark KM, Heiervang E, Heimann M *et al.* Predicting nonresponse bias from teacher ratings of mental health problems in primary school children *J Abnorm Child Psychol* 2008;36:411-9.
  35. Gentile DA, Oberg C, Sherwood NE *et al.* Well-child visits in the video age: pediatricians and the American Academy of Pediatrics' guidelines for children's media use *Pediatrics* 2004;114:1235-41.
  36. Dewald JF, Meijer AM, Oort FJ *et al.* The influence of sleep quality, sleep duration and sleepiness on school performance in children and adolescents: A meta-analytic review *Sleep Med Rev* 2010;14:179-89.
  37. Short MA, Gradisar M, Wright H *et al.* Time for bed: parent-set bedtimes associated with improved sleep and daytime functioning in adolescents *Sleep* 2011;34:797-800.
  38. Sivertsen B, Vedaa O, Nordgreen T. The future of insomnia treatment-the challenge of implementation *Sleep* 2013;36:303-4.



Table 1. Use of electronic devices in the last hour before bedtime and daytime screen use as risk factors for sleep onset latency (SOL) of 60 minutes or more and sleep deficiency of 2 hours or more in the youth@hordaland study (n=9846).<sup>§</sup>

|                                                       | SOL (≥60 minutes)   |           | Sleep deficiency (≥2 hours) |           |
|-------------------------------------------------------|---------------------|-----------|-----------------------------|-----------|
|                                                       | OR                  | 95% CI    | OR                          | 95% CI    |
| <b>Electronic devices in last hour before bedtime</b> |                     |           |                             |           |
| PC                                                    | 1.52 <sup>***</sup> | 1.34-1.71 | 1.53 <sup>***</sup>         | 1.34-1.76 |
| Cell phone                                            | 1.48 <sup>***</sup> | 1.30-1.68 | 1.35 <sup>***</sup>         | 1.17-1.55 |
| MP3-Player                                            | 1.36 <sup>***</sup> | 1.25-1.48 | 1.21 <sup>***</sup>         | 1.10-1.32 |
| Tablet                                                | 1.18 <sup>***</sup> | 1.08-1.29 | 1.12 <sup>*</sup>           | 1.02-1.23 |
| Console                                               | 1.13 <sup>***</sup> | 1.04-1.23 | 1.20 <sup>***</sup>         | 1.10-1.32 |
| TV                                                    | 1.19 <sup>***</sup> | 1.10-1.30 | 1.36 <sup>***</sup>         | 1.24-1.49 |
| <b>Daytime screen use</b>                             |                     |           |                             |           |
| Total screen time (4 hours +)                         | 1.49 <sup>***</sup> | 1.36-1.64 | 1.72 <sup>***</sup>         | 1.56-1.89 |
| Console games (2 hours +)                             | 1.20 <sup>*</sup>   | 1.04-1.38 | 1.31 <sup>***</sup>         | 1.13-1.52 |
| PC Games (2 hours +)                                  | 1.19 <sup>**</sup>  | 1.05-1.34 | 1.41 <sup>***</sup>         | 1.25-1.60 |
| Online chat (2 hours +)                               | 1.43 <sup>***</sup> | 1.31-1.56 | 1.87 <sup>***</sup>         | 1.70-2.05 |
| E-mail (2 hours +)                                    | 1.93 <sup>***</sup> | 1.55-2.40 | 1.68 <sup>***</sup>         | 1.31-2.14 |
| Other PC use (2 hours +)                              | 1.38 <sup>***</sup> | 1.26-1.51 | 1.37 <sup>***</sup>         | 1.25-1.51 |

<sup>§</sup> Reference: SOL < 60 minutes  
 p<.05; \*\* p<.01; \*\*\* p<.001;

**Table 2.** Use of electronic devices in last hour before bedtime and daytime screen use as risk factors for short sleep duration among girls and boys in the youth@hordaland study (n=9846).<sup>§</sup>

|                                                       | < 5hours            |           | 5-6 hours           |           | 6-7 hours           |           | 7-8 hours           |           |
|-------------------------------------------------------|---------------------|-----------|---------------------|-----------|---------------------|-----------|---------------------|-----------|
|                                                       | OR                  | 95% CI    |
| <b>Electronic devices in last hour before bedtime</b> |                     |           |                     |           |                     |           |                     |           |
| PC                                                    | 2.70 <sup>***</sup> | 2.14-3.39 | 2.69 <sup>***</sup> | 2.09-3.46 | 2.30 <sup>***</sup> | 1.90-2.79 | 1.64 <sup>***</sup> | 1.38-1.96 |
| Cell phone                                            | 1.85 <sup>***</sup> | 1.45-2.35 | 1.65 <sup>***</sup> | 1.28-2.13 | 1.75 <sup>***</sup> | 1.42-2.15 | 1.50 <sup>***</sup> | 1.24-1.83 |
| MP3-Player                                            | 1.52 <sup>***</sup> | 1.29-1.78 | 1.46 <sup>***</sup> | 1.12-1.73 | 1.33 <sup>***</sup> | 1.15-1.53 | 1.19 <sup>*</sup>   | 1.03-1.36 |
| iPad or other tablet                                  | 1.19 <sup>*</sup>   | 1.01-1.41 | 1.29 <sup>**</sup>  | 1.09-1.54 | 1.18 <sup>*</sup>   | 1.92-1.37 | 1.10                | 0.95-1.28 |
| Console                                               | 1.40 <sup>***</sup> | 1.19-1.64 | 1.38 <sup>***</sup> | 1.17-1.64 | 1.27 <sup>**</sup>  | 1.09-1.47 | 1.17 <sup>*</sup>   | 1.01-1.35 |
| TV                                                    | 1.51 <sup>***</sup> | 1.29-1.77 | 1.44 <sup>***</sup> | 1.22-1.71 | 1.35 <sup>***</sup> | 1.17-1.56 | 1.16 <sup>*</sup>   | 1.01-1.33 |
| <b>Daytime screen use</b>                             |                     |           |                     |           |                     |           |                     |           |
| Total screen time (4 hours +)                         | 3.64 <sup>***</sup> | 3.06-4.33 | 2.66 <sup>***</sup> | 2.22-3.19 | 2.07 <sup>***</sup> | 1.79-2.40 | 1.29 <sup>***</sup> | 1.12-1.49 |
| Console games (2 hours +)                             | 2.03 <sup>***</sup> | 1.53-2.69 | 1.73 <sup>***</sup> | 1.28-2.35 | 1.58 <sup>**</sup>  | 1.21-2.06 | 1.20                | 0.92-1.58 |
| PC Games (2 hours +)                                  | 1.90 <sup>***</sup> | 1.51-2.38 | 1.22                | 0.95-1.58 | 1.39 <sup>**</sup>  | 1.12-1.73 | 1.06                | 0.86-1.32 |
| Online chat (2 hours +)                               | 3.58 <sup>***</sup> | 3.03-4.24 | 2.79 <sup>***</sup> | 2.33-3.33 | 1.98 <sup>***</sup> | 1.70-2.30 | 1.31 <sup>***</sup> | 1.13-1.51 |
| E-mail (2 hours +)                                    | 3.28 <sup>***</sup> | 2.07-5.16 | 2.42 <sup>***</sup> | 1.48-3.95 | 1.34                | 0.84-2.14 | 1.14                | 0.72-1.82 |
| Other PC use (2 hours +)                              | 2.06 <sup>***</sup> | 1.74-2.42 | 2.04 <sup>***</sup> | 1.71-2.44 | 1.54 <sup>***</sup> | 1.33-1.78 | 1.21 <sup>**</sup>  | 1.05-1.39 |

<sup>§</sup> Reference: 8-9 hours  
p<.05; \* p<.01; \*\* p<.001;

**FIGURE LEGENDS**

Figure 1: Use of electronic devices during the last hour before bedtime among girls and boys in the youth@hordaland study (n=9846). Error bars represent 95% confidence intervals.

Figure 2: Average daytime screen use among girls and boys in the youth@hordaland study (n=9846). Error bars represent 95% confidence intervals.

Figure 3: Sleep duration and hours of screen use among adolescents in the youth@hordaland study (n=9846).

For peer review only

## Sleep and Use of Electronic Devices in Adolescence: Results from a Large Population-Based Study

Mari Hysing PhD <sup>a</sup>, Ståle Pallesen PhD <sup>b,c</sup>, Kjell Morten Stormark PhD <sup>a</sup>,  
Reidar Jakobsen PhD <sup>a</sup>, Astri J. Lundervold PhD <sup>a,d</sup>, Børge Sivertsen PhD <sup>e,f,g</sup>

- a) Regional Centre for Child and Youth Mental Health and Child Welfare, Uni Research Health, Bergen, P.O.Box 7810, N-5020 Bergen, Norway
- b) Department of Psychosocial Science, University of Bergen, N-5015 Bergen, Norway.
- c) Norwegian Competence Center for Sleep Disorders, Haukeland University Hospital, Jonas Lies vei 65, 5021 Bergen, Norway
- d) Department of Biological and Medical Psychology, University of Bergen, Jonas Lies vei 91, 5009 Bergen, Norway
- e) Division of Mental Health, Norwegian Institute of Public Health, Kalfarveien 31, 5018 Bergen, Norway
- f) Uni Research Health Bergen, P.O.Box 7810, N-5020 Bergen, Norway
- g) Department of Psychiatry, Helse Fonna HF, P.O.Box 2170, N-5504 Haugesund, Norway

**Corresponding author:** Dr. Mari Hysing, Regional Centre for Child and Youth Mental Health and Child Welfare, Postboks 7810, 5020 Bergen, Norway, Email: [mari.hysing@uni.no](mailto:mari.hysing@uni.no); Phone: +47 55 58 86 98

**Running title:** Sleep in the digital adolescent

**Keywords:** sleep; media use; epidemiology; adolescents

Total page count: 20

Word count for abstract: 250 (max 300)

Word count for body text: 3,615 (max 4000)

Number of tables: 2

Number of figures: 3

## ABSTRACT

**Objectives:** Adolescents spend increasingly more time on electronic devices, and sleep deficiency rising in adolescents constitutes a major public health concern. The aim of the present study was to investigate daytime screen use and use of electronic devices before bedtime in relation to sleep.

**Design:** A large cross-sectional population-based survey study from 2012, the youth@hordaland study, in Hordaland County in Norway.

**Setting:** Cross-sectional general community-based study.

**Participants:** 9,846 adolescents from three age cohorts aged 16-19. The main independent variables were type and frequency of electronic devices at bedtime and hours of screen-time during leisure time.

**Outcomes:** Sleep variables calculated based on self-report including bedtime, rise time, time in bed, sleep duration, sleep onset latency and wake after sleep onset.

**Results:** Adolescents spent a large amount of time during the day and at bedtime using electronic devices. Both day- and bedtime use of electronic devices were related to sleep measures, with an increased risk of short sleep duration, long sleep onset latency and increased sleep deficiency. A dose-response relationship emerged between sleep duration and use of electronic devices, exemplified by the association between PC use and risk of less than five hours of sleep (OR=2.70, CI95% 2.14-3.39), and a comparable lower odds for 7-8 hours of sleep (OR=1.64, CI95% 1.38-1.96).

**Conclusions:** Use of electronic devices is frequent ly used in adolescents, both during the day and at bedtime. The results demonstrate a negative relation between use of technology and sleep, suggesting that recommendations on healthy media use could include restrictions on electronic devices.

## STRENGTHS AND LIMITATIONS OF THIS STUDY

- This study employed a large well-defined population-based sample of adolescents.
- The data employed in this study is from a recent data collection.
- This study included several detailed measures of sleep patterns and sleep problems, as well as detailed measures of media use.
- The cross-sectional design of this study precluded any causal inference.
- This sample had a limited age-range.

## BACKGROUND

In the last decade we have witnessed a sharp increase in the availability and use of electronic devices such as smart phones, video game consoles, television, audio players, computers and tablets. Due to this, electronic devices have become an integral part of adolescent life, as exemplified by almost all American adolescents (97%) reporting to have at least one electronic media device in their bedroom [1]. In addition to the entertaining aspects, electronic devices play an important part in the social lives of adolescents. The constant change towards a more active, stimulating and social media use may however affect sleep in a negative way [2].

Parallel with the increased use of electronic devices, there has been a shift towards poorer sleep over the past decades among adolescents [3]. Recent epidemiological data on adolescent sleep shows that it on average is characterized by late bedtime, long sleep onset latency (SOL) and a short sleep duration of approximately 6 ½ hours on weekdays contributing to a daily sleep deficiency of about two hours [4].

The high rate of media use in adolescence may be one factor that is related to the short sleep duration and late bedtimes. TV use has consistently and inversely been associated with sleep duration [5, 6], as well as delayed bedtime and wake-up time in adolescents [7]. A high level of computer use has been found to be related to sleep problems [8], reduced time in bed [9, 10] and increased sleep onset latency [11]. Overall, electronic media use has been consistently linked with delayed bedtime and shortened sleep according to a review of the literature. However, some shortcomings in the existing literature were noted in the review. Future studies were recommended to measure sleep by self-report estimates of sleep parameters such as bedtime, sleep onset latency, time spent awake after sleep onset, wake-up time, and rise time, each estimated separately for weekdays and weekend days [12]. Newer technology, such as portable electronic devices has also been recommended to be included in future studies on this topic. Related to this, many of the previous studies have restricted their investigation to only one or two electronic devices [2, 10, 13]. Whether the same pattern of sleep problems is present across type of electronic devices is thus uncertain.

The mechanisms behind the relationships between use of electronic media devices and sleep problems are not well established, but a theoretical model of the relationship has been proposed [12], suggesting several possible mechanisms. According to this model, media use may directly affect sleep by replacing it due to its time consuming nature, or it may interfere with sleep through increased psychophysiological arousal caused by the stimulating content of the material, or through bright light exposure inherent in most electronic media devices

[12]. Bright light may impact sleep in two ways; by delaying the circadian rhythm when exposure takes place in the evening [14] and also by causing an immediate activation in itself [11, 15]. According to the aforementioned model sleep may also be negatively impacted by electromagnetic radiation [12]. Another proposed mechanism by which electronic media may impair sleep relates to physical discomfort, such as muscular pain and headache which can be caused by prolonged media use (e.g., computer games) [16]. Furthermore, repeated use of electronic media in the bed or in the bedroom can reduce the sleep inducing properties of the two latter, as the bed and bedroom become associated with electronic media use [17].

The present cross-sectional study will expand on the previous studies by taking a broad approach including measures of sleep duration, sleep onset latency, and sleep deficiency as well as including newer technological devices. Based on the presented literature on adolescent media use, we expected that the majority of adolescents would use electronic media devices at bedtime. Further, electronic media use was expected to be inversely related to sleep duration and positively related to sleep onset latency and sleep deficiency. Finally, we expected the association between sleep and media use to be similar across all devices/platforms.

## METHODS

### Study population

In this cross-sectional population-based study, we used data from the youth@hordaland survey of adolescents in the county of Hordaland in Western Norway. All adolescent born between 1993 and 1995 and all students attending secondary education during spring 2012 were invited. The main aim of the survey was to assess prevalence of mental health problems and service use in adolescents. Data were collected during spring 2012. Adolescents in secondary education received information per e-mail, and time during regular school hours was allocated for them to complete the questionnaire. The questionnaire was web-based, and a teacher was present to organize the data collection and to ensure confidentiality. Survey staff was available on a phone number for both the adolescents and school personnel for answering queries. Those not in school received information and the questionnaire package by postal mail to their home addresses, and were provided with a prepaid envelope for returning of the questionnaires.

### Sample

A total of 19430 adolescents born between 1993 and 1995 were invited to participate, of which 10220 agreed, yielding a participation rate of 53%. The mean age of those participating was 17 years, and the sample included more girls (53.5% / n=5252) than boys (46.5% / n=4594). The majority (97.9% / n=9219) were high school students.

Sleep variables were checked for validity of answers ~~based on preliminary data analysis~~, resulting in data from 374 subjects being excluded due to obvious invalid responses. For example, when calculating sleep duration and sleep efficiency, individuals with negative values on these computed variables were excluded from further the analyses. Thus, the total sample size in the current study was 9875.

### Instruments

#### *Use of electronic devices at bedtime*

Adolescents reported use of six different electronic media devices and if they used them in the bedroom the last hour before they went to sleep. The phrasing of the question was: “How many of the listed electronic devices do you use in your bedroom the last hour before going to bed?” Drag and drop function was incorporated as a feature of the web-based questionnaire. An image with corresponding description of the device was dragged and dropped to indicate use, and ranked by frequency of use with the most frequently used device in the top box etc. The indicated devices comprised PC, cell phone, MP3 player, tablet, game console and TV. No time-frame was available for the ratings.

#### *Screen time during daytime*

Time spent on screen-based activity was assessed by the following question: “Outside of school hours how much time do you usually spend on the following on weekdays 1) TV-games (PlayStation, Xbox, Wii etc.), 2) PC games, 3) Internet chatting, 4) writing and reading emails, 5) using the PC for other purposes)?” The responses alternatives were: “no time”, “less than ½ hour”, “½ hour to 1 hour”, “2-3 hours”, “4 hours” and “more than 4 hours”. A similar question has been used in the Health Behaviour in School-aged Children (HBSC) studies [18]. A 2 hour cut-off was used as most recommendations for screen-based activities restrict this to about 2 hours per day and this cut-off has also been used in previous relevant studies [19][20, 21]

#### *Sleep variables*

The adolescents’ typical bedtime and rise time were indicated in hours and minutes using a scroll down menu with five minutes intervals and were reported separately for weekend and



1  
2  
3 weekdays. Time in bed (TIB) was calculated by subtracting bedtime from rise time. Typical  
4 sleep onset latency (SOL) and wake after sleep onset (WASO) were indicated in hours and  
5 minutes using a scroll down menu with five minutes intervals, and sleep duration was defined  
6 as TIB minus SOL and WASO. Sleep duration was split into 10 categories, and SOL was  
7 categorized as either more or less than 60 minutes. Subjective sleep need (each individual's  
8 own perceived sleep need) was reported in hours and minutes on a scroll down menu with  
9 five minutes intervals, and the phrasing of the question was "How much sleep do you need to  
10 feel rested?" Sleep deficiency was calculated separately for weekends and weekdays,  
11 subtracting total sleep duration from subjective sleep need. Weekday sleep deficiency is used  
12 in the present study, and was dichotomized into  $<2$  hours and  $\geq 2$  hours.  
13  
14  
15  
16  
17  
18  
19  
20

### 21 **Statistics**

22 IBM SPSS Statistics 22 for Windows (SPSS Inc., Chicago, Ill) was used for all analyses. Chi-  
23 square tests were used to examine gender differences in use of electronic devices and daytime  
24 screen use. Independent sample t-tests and chi-square tests were used to examine the  
25 associations between sleep duration, electronic devices and daytime screen use. Logistic  
26 regression analyses using SOL of more than 60 minutes and sleep deficiency as outcome  
27 variables were conducted for all electronic devices and daytime screen (exposure variables).  
28 Multinomial logistic regression analyses were conducted with short sleep duration as the  
29 outcome variable (8-9 hours as the reference category) and electronic devices and daytime  
30 screen as the exposure variables. To investigate whether odds-ratios differed significantly  
31 between genders, we calculated the relative risk ratio (RRR) [22]. As these analyses yielded  
32 no significant gender differences, the results of the logistic regressions are presented without  
33 gender stratification.  
34  
35  
36  
37  
38  
39  
40  
41  
42  
43

### 44 **Ethics**

45  
46 The study was approved by the Regional Committee for Medical and Health Research Ethics  
47 (REC) in Western Norway. In accordance with the regulations from the REC and Norwegian  
48 health authorities, adolescents aged 16 years and older can make decisions regarding their  
49 own health, and may thus give consent themselves to participate in health studies.  
50

51 Parents/guardians have the right to be informed, and in the current study, all  
52 parents/guardians received written information about the study in advance. If the adolescents  
53 decided to participate they indicated if they wanted to participate in the study as a whole, or  
54 they could choose three options to specify their level of consent: 1) to complete the  
55  
56  
57  
58  
59  
60

questionnaire, 2) obtain information from parent questionnaire 3) linking data to national registries.

## RESULTS

### Use of electronic devices before bedtime and daytime screen time

The use of electronic devices stratified by gender is shown in Figure 1. Most adolescents used an electronic device in the hour before bedtime. Some gender differences emerged, with more boys using game consoles, whereas girls reported higher use of cell phones and Mp3 players ( $P_s < .001$ ).

-----  
Please insert Figure 1 about here  
-----

The average number of hours of screen time stratified by gender is presented in Figure 2. Girls reported significantly more online chatting and other PC use, while boys reported more console games and PC games (all  $P_s < .001$ ).

-----  
Please insert Figure 2 about here  
-----

~~When asked to indicate which electronic devices the adolescents used most often, PCs or cellphones were ranked highest (Figure 3).~~

-----  
Please insert Figure 3 about here  
-----

### Electronic devices at bedtime and daytime screen use in relation to long sleep onset latency

1  
2  
3 The odds ratios for reporting SOL of more than 60 minutes were calculated separately for  
4 each electronic device (Table 1). Use of PC, cell phone, Mp3-player, tablet, game console and  
5 TV were all associated with increased odds of SOL of more than 60 minutes.  
6  
7

8  
9 Daytime screen use showed the same pattern. A total screen time after school hours for more  
10 than four hours was related to long SOL (OR: 1.49, CI95% 1.36-1.64). When analyses were  
11 conducted separately for each electronic device, all daytime screen use over two hours was  
12 significantly associated with long SOL (see Table 1).  
13  
14

### 15 16 17 18 **Electronic devices at bedtime and daytime screen use in relation to sleep deficiency**

19 The odds for sleep deficiency of more than two hours were calculated separately for each  
20 electronic device (Table 1). Use of PC, cell phone, Mp3-player, game console and TV in the  
21 hour before bedtime were all associated with increased odds of sleep deficiency.  
22  
23

24  
25  
26 Total daytime screen use after school of more than four hours was positively related to sleep  
27 deficiency. When analyses were conducted separately for different electronic devices, all  
28 daytime screen use over two hours were significantly associated with sleep deficiency.  
29  
30

31  
32 -----  
33 Please insert Table 1 about here  
34 -----  
35

### 36 37 38 **Electronic devices at bedtime and daytime screen use in relation to sleep duration**

39 Hours of daytime screen use are presented in Figure 43. The odds for reporting short sleep  
40 duration (covering 4 different categories), with 8-9 hours as the reference category, was  
41 calculated separately for each electronic device (Table 2). A dose-response relationship  
42 emerged with the highest risk of short sleep duration under five hours, exemplified by the  
43 association between PC use and risk of less than five hours of sleep (OR: 2.70 CI95% 2.14-  
44 3.39), while the risk for 7-8 hours of sleep equaled an OR=1.64 (CI95% 1.38-1.96).  
45  
46  
47  
48

49  
50 -----  
51 Please insert Figure 43 and Table 2 about here  
52 -----  
53

54  
55 Daytime screen use showed a similar pattern. Total screen time above 4 hours was associated  
56 with an increased risk of less than five hours of sleep (OR: 3.64 CI95% 3.06-4.33), while the  
57 risk for 7-8 hours of sleep was OR=1.29 (CI95% 1.12-1.49). See Table 2 for details.  
58  
59

### **Multitasking of electronic devices at bedtime**

The risk of SOL of more than 60 minutes was increased in adolescents using 4 devices or more compared to adolescents using only one device (OR=1.26 (95% CI 1.07-1.49). The ORs for sleep deficiency for multitasking 2-3 devices was 1.50 (95% CI 1.26-1.79) and 4 or more devices 1.75 (95% CI 1.46-2.08), in comparison to using only one device. The ORs for sleeping less than 5 hours among multitasking teens ranged from 2.2 to 2.8 (depending on number of used devices) compared to only one device. The corresponding OR-ranges for sleeping 5-6 hour, 6-7 hours and 7-8 hours were 1.8-2.4, 1.9-2.1, and 1.4-1.5 respectively (all  $P$ s<.001 compared to sleeping 8-9 hours).

### **DISCUSSION**

In short, almost all adolescents reported using one or more electronic devices during the last hour before bedtime. Extensive use of these devices was significantly and positively associated with SOL and sleep deficiency, with an inverse dose-response relationship between sleep duration and media use.

The present study adds to the literature by showing that both day- and bedtime use of electronic devices across a range of platforms, including newer technology, are related to several sleep parameters. While the frequency of use differed between the various devices, the relation between different types of electronic devices and sleep remained significant. This suggests that the established relationship between TV and sleep found in previous studies [5, 6] can be generalized to newer technology. The relation between sleep and PC-use that has been demonstrated in previous studies in relation to poor sleep [8] and reduced time in bed [9, 10], was further corroborated by the results of the present study as PC was both one of the most frequently used platforms and showed also the highest risks for short sleep duration and sleep deficiency. Using multiple devices before bedtime was related to longer SOL and shorter sleep duration compared to using only one electronic device.

There are probably multiple pathways explaining the associations between sleep and electronic devices. Media use may directly affect sleep by replacing it due to its time consuming nature, or may interfere with sleep through increased psychophysiological arousal. Alternatively, the bright light exposure inherent in most electronic media devices [12] may

1  
2  
3 interfere with sleep by delaying the circadian rhythm when exposure takes place in the  
4 evening [14] and/or by causing an immediate activation in itself [11, 15].  
5  
6

7  
8 The relative importance of different devices is still a matter of discussion, although devices  
9 used for social communication have been proposed to have an especially negative effect on  
10 sleep [2]. However, the present study showed few statistically significant differences between  
11 the electronic devices. Further, both multitasking and the multi-functionality (e.g., homework  
12 vs. recreational use) of most platforms suggest that findings concerning the relationship  
13 between sleep and specific electronic devices and their type of use should be carefully  
14 interpreted.  
15  
16  
17  
18

19  
20 The present study found that the associations between electronic media use and sleep were  
21 robust across the included sleep parameters, including SOL, sleep deficiency and sleep  
22 duration, extending on the previous findings on the relationship between electronic media use  
23 and time in bed [9, 10]. The scarcity of similar studies makes the current findings hard to  
24 compare. In the 2010 review it was reported that two studies of adolescents assessed SOL [5,  
25 23], but after carefully reviewing these papers we could not find support for this. While the  
26 present study found a higher risk of long SOL associated with electronic media use, the exact  
27 cut-offs for long SOL at different developmental levels are not settled. Long SOL is usually  
28 defined as 31 minutes or more in adults [24], but as adolescents may experience longer SOL  
29 due to biologically based delayed circadian rhythms occurring during puberty [25], we  
30 decided to use a cut-off of 60 minutes.  
31  
32  
33  
34  
35  
36  
37

38  
39 Sleep need varies between individuals, and one can argue that adolescents with less need of  
40 sleep may spend more time on electronic devices than individuals with more extensive sleep  
41 needs. The inclusion of perceived sleep need and sleep deficiency defined by subtracting the  
42 actual sleep from their perceived sleep allowed us to explore this further. In the current study,  
43 a sleep duration of 8-9 hours was chosen as the reference category for all regression analyses,  
44 as this was the average sleep need reported by the adolescents [4], and also because this  
45 corresponds well with experts' recommended sleep need in this age group [25]. A strong  
46 relationship between use of electronic devices and subjective sleep deficiency was present,  
47 thus indicating that use of electronic devices is related to sleeping less than what themselves  
48 and experts deem necessary [25].  
49  
50  
51  
52  
53  
54

55  
56 There are some methodological limitations of the present study that should be noted. First, the  
57 cross-sectional design prevents us from drawing inferences about directionality. An indication  
58 of a causal relationship is the dose-response relationship between sleep duration and media  
59  
60

1  
2  
3 use. In terms of a reverse causality, it might be that some adolescents actively use media and  
4 technology as a sleeping aid [26], or to counteract boredom when not being able to sleep.  
5 Most likely the relationship between poor sleep and electronic media use reflects a self-  
6 perpetuating cycle. Second, the phrasing of the questions assessing daytime and bedtime use  
7 of electronic devices does not rule out some overlap between the two items. For example,  
8 when adolescents report a total screen time use of 6+ hours, it is not unlikely that some  
9 adolescents include the last hour before going to bed. Along the same lines, we had no  
10 information on the purpose of the screen time use, and as such we were not able to single out  
11 school-related work. In addition it cannot be ruled out that some adolescents multitask and  
12 use electronic media in parallel with other activities. ~~Second~~Third, the sleep measurements  
13 were solely based on self-reports, which renders the results susceptible to influence from the  
14 common method bias [27]. Although self-reported sleep parameters, including SOL and  
15 WASO typically differ from those obtained from objective assessments [28], recent studies  
16 have showed that self-report sleep assessments can be recommended for the characterization  
17 of sleep parameters in both clinical and population-based research [29]. Also, the accuracy of  
18 self-reported SOL and WASO are generally better among adolescents than in older adults  
19 [30], and a study of young adolescents in Hong Kong recently found good agreement between  
20 actigraphy measured and questionnaire reported sleep durations [31]. ~~Third~~Fourth, there may  
21 be confounders, variables that are related to both sleep and media use, that were not assessed,  
22 e.g. emotional and behavioral problems. Further, the clinical significance of the results may  
23 be discussed as some of the increased risks were small in magnitude, and how much added  
24 functional significance these represent needs further exploration. Also, attrition from the  
25 study could affect generalizability, with a response rate of about 53% and with adolescents in  
26 schools overrepresented. The problem with non-participation in survey research seems  
27 unfortunately to be on the rise [32]. Official data show that in 2012, 92% of all adolescents in  
28 Norway aged 16-18 attended high school [33], compared to 98% in the current study. Based  
29 on previous research from the former waves of the Bergen Child Study (the same population  
30 as the current study), non-participants had more emotional and behavioural problems, albeit  
31 small in magnitude, in comparison the participants. [34]. It is therefore likely that the  
32 prevalence of sleep problems may be underestimated in the current study. Finally, the cross-  
33 sectional design of the study restricts causal attributions, and prospective studies are still  
34 needed to disentangle the temporal relationship.

35  
36  
37  
38  
39  
40  
41  
42  
43  
44  
45  
46  
47  
48  
49  
50  
51  
52  
53  
54  
55  
56  
57  
58  
59  
60  
The assessment method may also have influenced the results. While the daytime screen use  
was based on a previous validated instrument [18], the questions used for the assessment of  
bedtime use of electronic devices were new. A broader scope compared to most previous  
studies, including questions about cell phones and Mp3-players as well as newer technology

1  
2  
3 such as tablets, is a strength of the present study. Screen time use cannot be regarded as the  
4 absolute time spent in front of a screen, as other platforms may not be included and there  
5 might be an overlap between the daytime and bedtime use.  
6  
7

8  
9 Parallel with the rapid change in technology, the recommendations for healthy media use  
10 given to parents and adolescence also need updating. and age-specific guidelines regarding  
11 the quantity and timing of electronic media use should be developed and made known to the  
12 public [12]. The current recommendation is not to have a TV in the bedroom [35]. It seems,  
13 however, that there may be other electronic devices exerting the same negative influence on  
14 sleep, such as PCs and mobile phones. The results confirm recommendations for restricting  
15 media use in general. The combination of secular trends to impaired sleep (see[3] and the  
16 established relationship to health and school achievement [36] underscore the importance of  
17 prevention. The scope of the problem suggests that this is a public health issue and that  
18 primary prevention may be needed. Parent-set bedtimes have been shown to be related to  
19 good sleep hygiene in adolescents [37] and an increased parental involvement in technology  
20 use could be a recommendation based on the findings, but this needs further evidence. While  
21 technology use may be a source of sleep deficiency, this may also serve as a medium of  
22 intervention, as internet-based interventions have proven to be effective and cost-efficient  
23 modes of treating sleep problems [38].  
24  
25  
26  
27  
28  
29  
30  
31  
32  
33  
34  
35  
36  
37  
38  
39  
40  
41  
42  
43  
44  
45  
46  
47  
48  
49  
50  
51  
52  
53  
54  
55  
56  
57  
58  
59  
60

### CONTRIBUTORSHIP STATEMENT

Author KM, AJL, RJ and MH were involved in acquisition of data. Authors MH and BS were responsible for conception and design of the study. BS and MH did the analysis and interpretation of data. MH, BS and SP drafted the manuscript. Authors KM, RJ and AJL gave critical revision of the manuscript for important intellectual content. KM and RJ obtained funding, and KM, RJ and AJL gave materialistic, technical or material support. Authors MH and BS had full access to all the data in the study and takes responsibility for the integrity of the data and the accuracy of the data analysis.

### COMPETING INTERESTS

The authors declare that they have no competing interests.

### FUNDING

The youth@hordaland study was funded by Uni Research Health and Norwegian Directorate for Health and Social Affairs.

### DATA SHARING

Data for research projects from the population-based youth@hordaland study may be made available at request from Regional Centre for Child and Youth Mental Health and Child Welfare, Uni Research Health, Bergen, Norway.

### ACKNOWLEDGEMENTS

The authors would like to thank Regional Centre for Child and Youth Mental Health and Child Welfare at Uni Research Health for making the collection of the data, and making the data available for this study. The authors would like to thank the participants for their time and effort.



## REFERENCES

1. National Sleep Foundation: **Sleep In America Poll**. In: <http://www.sleepfoundation.org/article/sleep-america-polls/2006-teens-and-sleep>. vol. 2006; 2006.
2. Van den Bulck J. Text messaging as a cause of sleep interruption in adolescents, evidence from a cross-sectional study *J Sleep Res* 2003;12:263.
3. Pallesen S, Hetland J, Sivertsen B *et al*. Time trends in sleep-onset difficulties among Norwegian adolescents: 1983--2005 *Scand J Public Health* 2008;36:889-95.
4. Hysing M, Pallesen S, Stormark KM *et al*. Sleep patterns and insomnia among adolescents: a population-based study *Journal of sleep research* 2013;22:549-56.
5. Van den Bulck J. The effects of media on sleep *Adolesc Med State Art Rev* 2010;21:418-29, vii.
6. Adam EK, Snell EK, Pendry P. Sleep timing and quantity in ecological and family context: a nationally representative time-diary study *J Fam Psychol* 2007;21:4-19.
7. Thorleifsdottir B, Bjornsson JK, Benediktsdottir B *et al*. Sleep and sleep habits from childhood to young adulthood over a 10-year period *J Psychosom Res* 2002;53:529-37.
8. Dorofaeff TF, Denny S. Sleep and adolescence. Do New Zealand teenagers get enough? *J Paediatr Child Health* 2006;42:515-20.
9. Punamaki RL, Wallenius M, Nygard CH *et al*. Use of information and communication technology (ICT) and perceived health in adolescence: the role of sleeping habits and waking-time tiredness *J Adolesc* 2007;30:569-85.
10. Yen CF, Ko CH, Yen JY *et al*. The multidimensional correlates associated with short nocturnal sleep duration and subjective insomnia among Taiwanese adolescents *Sleep* 2008;31:1515-25.
11. Weaver E, Gradisar M, Dohnt H *et al*. The effect of presleep video-game playing on adolescent sleep *J Clin Sleep Med* 2010;6:184-9.
12. Cain N, Gradisar M. Electronic media use and sleep in school-aged children and adolescents: A review *Sleep Med* 2010;11:735-42.
13. Weissbluth M, Poncher J, Given G *et al*. Sleep duration and television viewing *J Pediatr* 1981;99:486-8.
14. Khalsa SB, Jewett ME, Cajochen C *et al*. A phase response curve to single bright light pulses in human subjects *J Physiol* 2003;549:945-52.
15. Campbell SS, Dijk DJ, Boulos Z *et al*. Light treatment for sleep disorders: consensus report. III. Alerting and activating effects *J Biol Rhythms* 1995;10:129-32.

16. Thomee S, Dellve L, Harenstam A *et al*. Perceived connections between information and communication technology use and mental symptoms among young adults - a qualitative study *BMC Public Health* 2010;10:66.
17. Hauri P, Fisher J. Persistent psychophysiologic (learned) insomnia *Sleep* 1986;9:38-53.
18. Melkevik O, Torsheim T, Iannotti RJ *et al*. Is spending time in screen-based sedentary behaviors associated with less physical activity: a cross national investigation *The international journal of behavioral nutrition and physical activity* 2010;7:46.
19. Bar-on ME. The effects of television on child health: implications and recommendations *Archives of disease in childhood* 2000;83:289-92.
20. Owens J, Maxim R, McGuinn M *et al*. Television-viewing habits and sleep disturbance in school children *Pediatrics* 1999;104:e27.
21. Alexandru G, Michikazu S, Shimako H *et al*. Epidemiological aspects of self-reported sleep onset latency in Japanese junior high school children *J Sleep Res* 2006;15:266-75.
22. Altman DG, Bland JM. Interaction revisited: the difference between two estimates *Bmj* 2003;326:219.
23. Johnson JG, Cohen P, Kasen S *et al*. Association between television viewing and sleep problems during adolescence and early adulthood *Arch Pediatr Adolesc Med* 2004;158:562-8.
24. Lichstein KL, Durrence HH, Taylor DJ *et al*. Quantitative criteria for insomnia *Behav Res Ther* 2003;41:427-45.
25. Carskadon MA, Harvey K, Duke P *et al*. Pubertal changes in daytime sleepiness *Sleep* 1980;2:453-60.
26. Eggermont S, Van den Bulck J. Nodding off or switching off? The use of popular media as a sleep aid in secondary-school children *J Paediatr Child Health* 2006;42:428-33.
27. Podsakoff PM, MacKenzie SB, Lee JY *et al*. Common method biases in behavioral research: A critical review of the literature and recommended remedies *Journal of Applied Psychology* 2003;88:879-903.
28. Lauderdale DS, Knutson KL, Yan LL *et al*. Self-reported and measured sleep duration: how similar are they? *Epidemiology* 2008;19:838-45.
29. Zinkhan M, Berger K, Hense S *et al*. Agreement of different methods for assessing sleep characteristics: a comparison of two actigraphs, wrist and hip placement, and self-report with polysomnography *Sleep medicine* 2014.

- 1  
2  
3 30. Dillon HR, Lichstein KL, Dautovich ND *et al.* Variability in self-reported normal  
4 sleep across the adult age span *J Gerontol B Psychol Sci Soc Sci* 2014.  
5  
6 31. Kong AP, Wing YK, Choi KC *et al.* Associations of sleep duration with obesity and  
7 serum lipid profile in children and adolescents *Sleep medicine* 2011;12:659-65.  
8  
9 32. Morton SMB, Bandara DK, Robinson EM *et al.* In the 21st Century, what is an  
10 acceptable response rate? *Aust Nz J Publ Heal* 2012;36:106-8.  
11  
12 33. The Directorate of Integration and Diversity (IMDi): **[Education participation in**  
13 **high schools]**. [http://www.imdi.no/no/Fakta-og-statistikk/Fakta-og-](http://www.imdi.no/no/Fakta-og-statistikk/Fakta-og-statistikk/Utdanning/?tab=chr)  
14 [statistikk/Utdanning/?tab=chr](http://www.imdi.no/no/Fakta-og-statistikk/Fakta-og-statistikk/Utdanning/?tab=chr); 2012.  
15  
16 34. Stormark KM, Heiervang E, Heimann M *et al.* Predicting nonresponse bias from  
17 teacher ratings of mental health problems in primary school children *J Abnorm Child*  
18 *Psychol* 2008;36:411-9.  
19  
20 35. Gentile DA, Oberg C, Sherwood NE *et al.* Well-child visits in the video age:  
21 pediatricians and the American Academy of Pediatrics' guidelines for children's  
22 media use *Pediatrics* 2004;114:1235-41.  
23  
24 36. Dewald JF, Meijer AM, Oort FJ *et al.* The influence of sleep quality, sleep duration  
25 and sleepiness on school performance in children and adolescents: A meta-analytic  
26 review *Sleep Med Rev* 2010;14:179-89.  
27  
28 37. Short MA, Gradisar M, Wright H *et al.* Time for bed: parent-set bedtimes associated  
29 with improved sleep and daytime functioning in adolescents *Sleep* 2011;34:797-800.  
30  
31 38. Sivertsen B, Vedaa O, Nordgreen T. The future of insomnia treatment-the challenge  
32 of implementation *Sleep* 2013;36:303-4.  
33  
34  
35  
36  
37  
38  
39  
40  
41  
42  
43  
44  
45  
46  
47  
48  
49  
50  
51  
52  
53  
54  
55  
56  
57  
58  
59  
60

**Table 1.** Use of electronic devices in the last hour before bedtime and daytime screen use as risk factors for sleep onset latency (SOL) of 60 minutes or more and sleep deficiency of 2 hours or more in the youth@hordaland study (n=9846).<sup>§</sup>

|                                                       | SOL (≥60 minutes)   |           | Sleep deficiency (≥2 hours) |           |
|-------------------------------------------------------|---------------------|-----------|-----------------------------|-----------|
|                                                       | OR                  | 95% CI    | OR                          | 95% CI    |
| <b>Electronic devices in last hour before bedtime</b> |                     |           |                             |           |
| PC                                                    | 1.52 <sup>***</sup> | 1.34-1.71 | 1.53 <sup>***</sup>         | 1.34-1.76 |
| Cell phone                                            | 1.48 <sup>***</sup> | 1.30-1.68 | 1.35 <sup>***</sup>         | 1.17-1.55 |
| MP3-Player                                            | 1.36 <sup>***</sup> | 1.25-1.48 | 1.21 <sup>***</sup>         | 1.10-1.32 |
| Tablet                                                | 1.18 <sup>***</sup> | 1.08-1.29 | 1.12 <sup>*</sup>           | 1.02-1.23 |
| Console                                               | 1.13 <sup>***</sup> | 1.04-1.23 | 1.20 <sup>***</sup>         | 1.10-1.32 |
| TV                                                    | 1.19 <sup>***</sup> | 1.10-1.30 | 1.36 <sup>***</sup>         | 1.24-1.49 |
| <b>Daytime screen use</b>                             |                     |           |                             |           |
| Total screen time (4 hours +)                         | 1.49 <sup>***</sup> | 1.36-1.64 | 1.72 <sup>***</sup>         | 1.56-1.89 |
| Console games (2 hours +)                             | 1.20 <sup>*</sup>   | 1.04-1.38 | 1.31 <sup>***</sup>         | 1.13-1.52 |
| PC Games (2 hours +)                                  | 1.19 <sup>**</sup>  | 1.05-1.34 | 1.41 <sup>***</sup>         | 1.25-1.60 |
| Online chat (2 hours +)                               | 1.43 <sup>***</sup> | 1.31-1.56 | 1.87 <sup>***</sup>         | 1.70-2.05 |
| E-mail (2 hours +)                                    | 1.93 <sup>***</sup> | 1.55-2.40 | 1.68 <sup>***</sup>         | 1.31-2.14 |
| Other PC use (2 hours +)                              | 1.38 <sup>***</sup> | 1.26-1.51 | 1.37 <sup>***</sup>         | 1.25-1.51 |

§ Reference: SOL < 60 minutes  
 p<.05; \*\* p<.01; \*\*\* p<.001;

1  
2  
3  
4  
5  
6  
7  
8  
9  
10  
11  
12  
13  
14  
15  
16  
17  
18  
19  
20  
21  
22  
23  
24  
25  
26  
27  
28  
29  
30  
31  
32  
33  
34  
35  
36  
37  
38  
39  
40  
41  
42  
43  
44  
45  
46  
47  
48  
49

**Table 2.** Use of electronic devices in last hour before bedtime and daytime screen use as risk factors for short sleep duration among girls and boys in the youth@hordaland study (n=9846).<sup>§</sup>

|                                                       | < 5hours            |           | 5-6 hours           |           | 6-7 hours           |           | 7-8 hours           |           |
|-------------------------------------------------------|---------------------|-----------|---------------------|-----------|---------------------|-----------|---------------------|-----------|
|                                                       | OR                  | 95% CI    |
| <b>Electronic devices in last hour before bedtime</b> |                     |           |                     |           |                     |           |                     |           |
| PC                                                    | 2.70 <sup>***</sup> | 2.14-3.39 | 2.69 <sup>***</sup> | 2.09-3.46 | 2.30 <sup>***</sup> | 1.90-2.79 | 1.64 <sup>***</sup> | 1.38-1.96 |
| Cell phone                                            | 1.85 <sup>***</sup> | 1.45-2.35 | 1.65 <sup>***</sup> | 1.28-2.13 | 1.75 <sup>***</sup> | 1.42-2.15 | 1.50 <sup>***</sup> | 1.24-1.83 |
| MP3-Player                                            | 1.52 <sup>***</sup> | 1.29-1.78 | 1.46 <sup>***</sup> | 1.12-1.73 | 1.33 <sup>***</sup> | 1.15-1.53 | 1.19 <sup>*</sup>   | 1.03-1.36 |
| iPad or other tablet                                  | 1.19 <sup>*</sup>   | 1.01-1.41 | 1.29 <sup>**</sup>  | 1.09-1.54 | 1.18 <sup>*</sup>   | 1.92-1.37 | 1.10                | 0.95-1.28 |
| Console                                               | 1.40 <sup>***</sup> | 1.19-1.64 | 1.38 <sup>***</sup> | 1.17-1.64 | 1.27 <sup>**</sup>  | 1.09-1.47 | 1.17 <sup>*</sup>   | 1.01-1.35 |
| TV                                                    | 1.51 <sup>***</sup> | 1.29-1.77 | 1.44 <sup>***</sup> | 1.22-1.71 | 1.35 <sup>***</sup> | 1.17-1.56 | 1.16 <sup>*</sup>   | 1.01-1.33 |
| <b>Daytime screen use</b>                             |                     |           |                     |           |                     |           |                     |           |
| Total screen time (4 hours +)                         | 3.64 <sup>***</sup> | 3.06-4.33 | 2.66 <sup>***</sup> | 2.22-3.19 | 2.07 <sup>***</sup> | 1.79-2.40 | 1.29 <sup>***</sup> | 1.12-1.49 |
| Console games (2 hours +)                             | 2.03 <sup>***</sup> | 1.53-2.69 | 1.73 <sup>***</sup> | 1.28-2.35 | 1.58 <sup>**</sup>  | 1.21-2.06 | 1.20                | 0.92-1.58 |
| PC Games (2 hours +)                                  | 1.90 <sup>***</sup> | 1.51-2.38 | 1.22                | 0.95-1.58 | 1.39 <sup>**</sup>  | 1.12-1.73 | 1.06                | 0.86-1.32 |
| Online chat (2 hours +)                               | 3.58 <sup>***</sup> | 3.03-4.24 | 2.79 <sup>***</sup> | 2.33-3.33 | 1.98 <sup>***</sup> | 1.70-2.30 | 1.31 <sup>***</sup> | 1.13-1.51 |
| E-mail (2 hours +)                                    | 3.28 <sup>***</sup> | 2.07-5.16 | 2.42 <sup>***</sup> | 1.48-3.95 | 1.34                | 0.84-2.14 | 1.14                | 0.72-1.82 |
| Other PC use (2 hours +)                              | 2.06 <sup>***</sup> | 1.74-2.42 | 2.04 <sup>***</sup> | 1.71-2.44 | 1.54 <sup>***</sup> | 1.33-1.78 | 1.21 <sup>**</sup>  | 1.05-1.39 |

<sup>§</sup> Reference: 8-9 hours  
p<.05; \*\* p<.01; \*\*\* p<.001;

**FIGURE LEGENDS**

Figure 1: Use of electronic devices during the last hour before bedtime among girls and boys in the youth@hordaland study (n=9846). Error bars represent 95% confidence intervals.

Figure 2: Average daytime screen use among girls and boys in the youth@hordaland study (n=9846). Error bars represent 95% confidence intervals.

~~Figure 3: Electronic devices ranked as the most commonly used during the last hour before bedtime among girls and boys in the youth@hordaland study (n=9846). Error bars represent 95% confidence intervals.~~

Figure 43: Sleep duration and hours of screen use among adolescents in the youth@hordaland study (n=9846).

1  
2  
3  
4  
5  
6  
7  
8  
9  
10  
11  
12  
13  
14  
15  
16  
17  
18  
19  
20  
21  
22  
23  
24  
25  
26  
27  
28  
29  
30  
31  
32  
33  
34  
35  
36  
37  
38  
39  
40  
41  
42  
43  
44  
45  
46  
47  
48  
49  
50  
51  
52  
53  
54  
55  
56  
57  
58  
59  
60

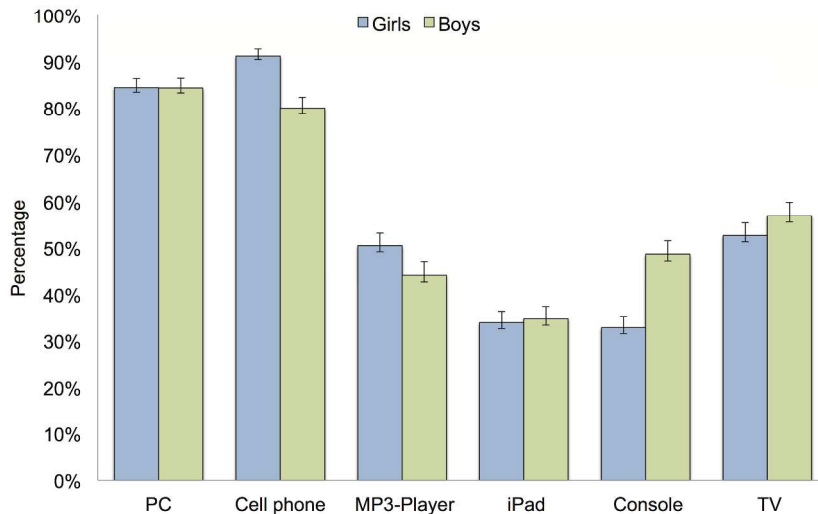

Use of electronic devices during the last hour before bedtime among girls and boys in the youth@hordaland study (n=9846). Error bars represent 95% confidence intervals.  
297x209mm (300 x 300 DPI)

Review only

1  
2  
3  
4  
5  
6  
7  
8  
9  
10  
11  
12  
13  
14  
15  
16  
17  
18  
19  
20  
21  
22  
23  
24  
25  
26  
27  
28  
29  
30  
31  
32  
33  
34  
35  
36  
37  
38  
39  
40  
41  
42  
43  
44  
45  
46  
47  
48  
49  
50  
51  
52  
53  
54  
55  
56  
57  
58  
59  
60

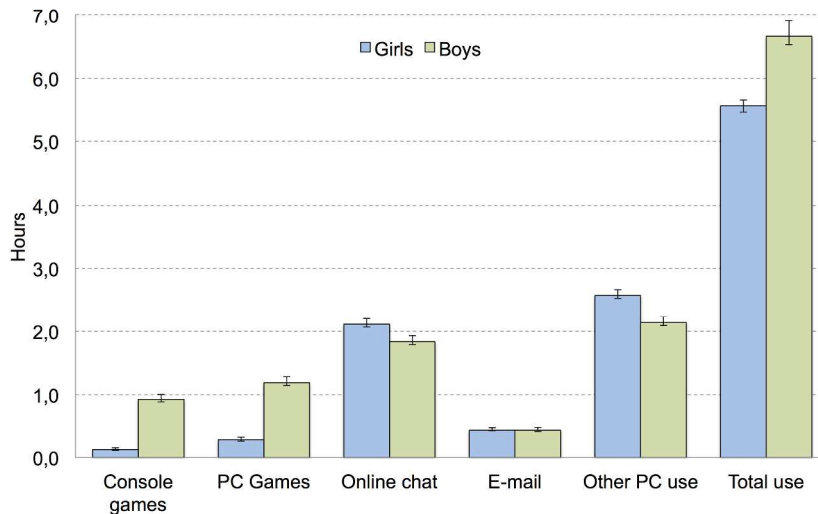

Average daytime screen use among girls and boys in the youth@hordaland study (n=9846). Error bars represent 95% confidence intervals.  
297x209mm (300 x 300 DPI)

ew only



1  
2  
3  
4  
5  
6  
7  
8  
9  
10  
11  
12  
13  
14  
15  
16  
17  
18  
19  
20  
21  
22  
23  
24  
25  
26  
27  
28  
29  
30  
31  
32  
33  
34  
35  
36  
37  
38  
39  
40  
41  
42  
43  
44  
45  
46  
47  
48  
49  
50  
51  
52  
53  
54  
55  
56  
57  
58  
59  
60

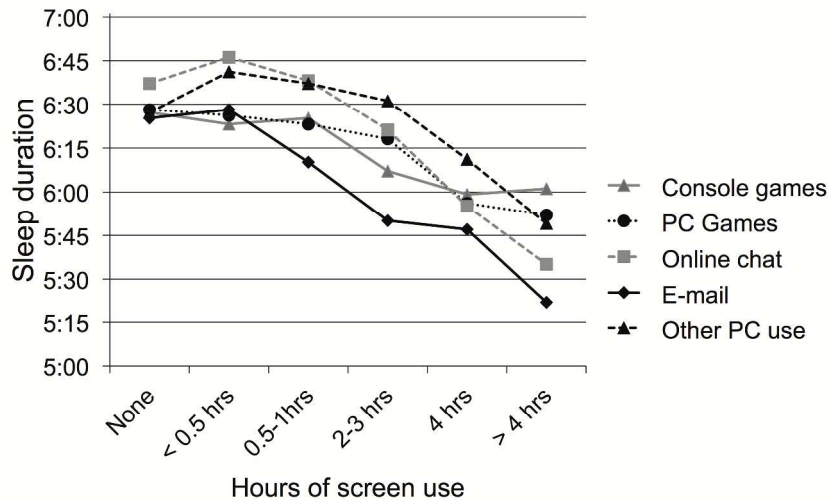

Sleep duration and hours of screen use among adolescents in the youth@hordaland study (n=9846).  
297x209mm (300 x 300 DPI)

view only

# BMJ Open

## Sleep and Use of Electronic Devices in Adolescence: Results from a Large Population-Based Study

|                                 |                                                                                                                                                                                                                                                                                                                                                                                                                                                                                                                                                                                                                                             |
|---------------------------------|---------------------------------------------------------------------------------------------------------------------------------------------------------------------------------------------------------------------------------------------------------------------------------------------------------------------------------------------------------------------------------------------------------------------------------------------------------------------------------------------------------------------------------------------------------------------------------------------------------------------------------------------|
| Journal:                        | <i>BMJ Open</i>                                                                                                                                                                                                                                                                                                                                                                                                                                                                                                                                                                                                                             |
| Manuscript ID:                  | bmjopen-2014-006748.R2                                                                                                                                                                                                                                                                                                                                                                                                                                                                                                                                                                                                                      |
| Article Type:                   | Research                                                                                                                                                                                                                                                                                                                                                                                                                                                                                                                                                                                                                                    |
| Date Submitted by the Author:   | 28-Nov-2014                                                                                                                                                                                                                                                                                                                                                                                                                                                                                                                                                                                                                                 |
| Complete List of Authors:       | Hysing, Mari; Uni Research Health, Regional Centre for Child and Youth Mental Health and Child Welfare<br>Pallesen, Staale; University of Bergen, Department of Psychosocial Science<br>Stormark, Kjell Morten; Uni Research Health, Regional Centre for Child and Youth Mental Health and Child Welfare<br>Jakobsen, Reidar; Uni Health, Uni Research, Regional Centre for Child and Youth Mental Health and Child Welfare<br>Lundervold, Astri; University of Bergen, Department of Biological and Medical Psychology<br>Sivertsen, Børge; Norwegian Institute of Public Health, Department of Public Mental Health; Uni Research Health, |
| <b>Primary Subject Heading</b>: | Epidemiology                                                                                                                                                                                                                                                                                                                                                                                                                                                                                                                                                                                                                                |
| Secondary Subject Heading:      | Mental health, Epidemiology                                                                                                                                                                                                                                                                                                                                                                                                                                                                                                                                                                                                                 |
| Keywords:                       | sleep, media use, EPIDEMIOLOGY, adolescents                                                                                                                                                                                                                                                                                                                                                                                                                                                                                                                                                                                                 |
|                                 |                                                                                                                                                                                                                                                                                                                                                                                                                                                                                                                                                                                                                                             |

SCHOLARONE™  
Manuscripts

only

# Sleep and Use of Electronic Devices in Adolescence: Results from a Large Population-Based Study

Mari Hysing PhD<sup>a</sup>, Ståle Pallesen PhD<sup>b,c</sup>, Kjell Morten Stormark PhD<sup>a</sup>,  
Reidar Jakobsen PhD<sup>a</sup>, Astri J. Lundervold PhD<sup>a,d</sup>, Børge Sivertsen PhD<sup>e,f,g</sup>

- a) Regional Centre for Child and Youth Mental Health and Child Welfare, Uni Research Health, Bergen, P.O.Box 7810, N-5020 Bergen, Norway
- b) Department of Psychosocial Science, University of Bergen, N-5015 Bergen, Norway.
- c) Norwegian Competence Center for Sleep Disorders, Haukeland University Hospital, Jonas Lies vei 65, 5021 Bergen, Norway
- d) Department of Biological and Medical Psychology, University of Bergen, Jonas Lies vei 91, 5009 Bergen, Norway
- e) Division of Mental Health, Norwegian Institute of Public Health, Kalfarveien 31, 5018 Bergen, Norway
- f) Uni Research Health Bergen, P.O.Box 7810, N-5020 Bergen, Norway
- g) Department of Psychiatry, Helse Fonna HF, P.O.Box 2170, N-5504 Haugesund, Norway

**Corresponding author:** Dr. Mari Hysing, Regional Centre for Child and Youth Mental Health and Child Welfare, Postboks 7810, 5020 Bergen, Norway, Email: [mari.hysing@uni.no](mailto:mari.hysing@uni.no); Phone: +47 55 58 86 98

**Running title:** Sleep in the digital adolescent

**Keywords:** sleep; media use; epidemiology; adolescents

Total page count: 20

Word count for abstract: 250 (max 300)

Word count for body text: 3,774 (max 4000)

Number of tables: 2

Number of figures: 3

## ABSTRACT

**Objectives:** Adolescents spend increasingly more time on electronic devices, and sleep deficiency rising in adolescents constitutes a major public health concern. The aim of the present study was to investigate daytime screen use and use of electronic devices before bedtime in relation to sleep.

**Design:** A large cross-sectional population-based survey study from 2012, the youth@hordaland study, in Hordaland County in Norway.

**Setting:** Cross-sectional general community-based study.

**Participants:** 9,846 adolescents from three age cohorts aged 16-19. The main independent variables were type and frequency of electronic devices at bedtime and hours of screen-time during leisure time.

**Outcomes:** Sleep variables calculated based on self-report including bedtime, rise time, time in bed, sleep duration, sleep onset latency and wake after sleep onset.

**Results:** Adolescents spent a large amount of time during the day and at bedtime using electronic devices. Both day- and bedtime use of electronic devices were related to sleep measures, with an increased risk of short sleep duration, long sleep onset latency and increased sleep deficiency. A dose-response relationship emerged between sleep duration and use of electronic devices, exemplified by the association between PC use and risk of less than five hours of sleep (OR=2.70, CI95% 2.14-3.39), and a comparable lower odds for 7-8 hours of sleep (OR=1.64, CI95% 1.38-1.96).

**Conclusions:** Use of electronic devices is frequent in adolescence, both during the day and at bedtime. The results demonstrate a negative relation between use of technology and sleep, suggesting that recommendations on healthy media use could include restrictions on electronic devices.

## STRENGTHS AND LIMITATIONS OF THIS STUDY

- This study employed a large well-defined population-based sample of adolescents.
- The data employed in this study is from a recent data collection.
- This study included several detailed measures of sleep patterns and sleep problems, as well as detailed measures of media use.
- The cross-sectional design of this study precluded any causal inference.
- This sample had a limited age-range.

## BACKGROUND

In the last decade we have witnessed a sharp increase in the availability and use of electronic devices such as smart phones, video game consoles, television, audio players, computers and tablets. Due to this, electronic devices have become an integral part of adolescent life, as exemplified by almost all American adolescents (97%) reporting to have at least one electronic media device in their bedroom [1]. In addition to the entertaining aspects, electronic devices play an important part in the social lives of adolescents. The constant change towards a more active, stimulating and social media use may however affect sleep in a negative way [2].

Parallel with the increased use of electronic devices, there has been a shift towards poorer sleep over the past decades among adolescents [3]. Recent epidemiological data on adolescent sleep shows that it on average is characterized by late bedtime, long sleep onset latency (SOL) and a short sleep duration of approximately 6 ½ hours on weekdays contributing to a daily sleep deficiency of about two hours [4].

The high rate of media use in adolescence may be one factor that is related to the short sleep duration and late bedtimes. TV use has consistently and inversely been associated with sleep duration [5, 6], as well as delayed bedtime and wake-up time in adolescents [7]. A high level of computer use has been found to be related to sleep problems [8], reduced time in bed [9, 10] and increased sleep onset latency [11]. Overall, electronic media use has been consistently linked with delayed bedtime and shortened sleep according to a review of the literature. However, some shortcomings in the existing literature were noted in the review. Future studies were recommended to measure sleep by self-report estimates of sleep parameters such as bedtime, sleep onset latency, time spent awake after sleep onset, wake-up time, and rise time, each estimated separately for weekdays and weekend days [12]. Newer technology, such as portable electronic devices has also been recommended to be included in future studies on this topic. Related to this, many of the previous studies have restricted their investigation to only one or two electronic devices [2, 10, 13]. Whether the same pattern of sleep problems is present across type of electronic devices is thus uncertain.

The mechanisms behind the relationships between use of electronic media devices and sleep problems are not well established, but a theoretical model of the relationship has been proposed [12], suggesting several possible mechanisms. According to this model, media use may directly affect sleep by replacing it due to its time consuming nature, or it may interfere with sleep through increased psychophysiological arousal caused by the stimulating content of the material, or through bright light exposure inherent in most electronic media devices

1  
2  
3 [12]. Bright light may impact sleep in two ways; by delaying the circadian rhythm when  
4 exposure takes place in the evening [14] and also by causing an immediate activation in itself  
5 [11, 15]. According to the aforementioned model sleep may also be negatively impacted by  
6 electromagnetic radiation [12]. Another proposed mechanism by which electronic media may  
7 impair sleep relates to physical discomfort, such as muscular pain and headache which can be  
8 caused by prolonged media use (e.g., computer games) [16]. Furthermore, repeated use of  
9 electronic media in the bed or in the bedroom can reduce the sleep inducing properties of the  
10 two latter, as the bed and bedroom become associated with electronic media use [17].  
11  
12  
13  
14  
15

16  
17 The present cross-sectional study will expand on the previous studies by taking a broad  
18 approach including measures of sleep duration, sleep onset latency, and sleep deficiency as  
19 well as including newer technological devices. Based on the presented literature on  
20 adolescent media use, we expected that the majority of adolescents would use electronic  
21 media devices at bedtime. Further, electronic media use was expected to be inversely related  
22 to sleep duration and positively related to sleep onset latency and sleep deficiency. Finally,  
23 we expected the association between sleep and media use to be similar across all  
24 devices/platforms.  
25  
26  
27  
28  
29  
30  
31

## 32 **METHODS**

### 33 **Study population**

34  
35 In this cross-sectional population-based study, we used data from the youth@hordaland  
36 survey of adolescents in the county of Hordaland in Western Norway. All adolescent born  
37 from 1993 to 1995, and all students attending secondary education during spring 2012, were  
38 invited. The main aim of the survey was to assess prevalence of mental health problems and  
39 service use in adolescents. All questionnaires were piloted and refined in a single school in  
40 2011 before including it in the youth@hordaland study. Data were collected during spring  
41 2012. Adolescents in secondary education received information per e-mail, and time during  
42 regular school hours was allocated for them to complete the questionnaire. The questionnaire  
43 was web-based, and a teacher was present to organize the data collection and to ensure  
44 confidentiality. Survey staff was available on a phone number for both the adolescents and  
45 school personnel for answering queries. Those not in school received information and the  
46 questionnaire package by postal mail to their home addresses, and were provided with a  
47 prepaid envelope for returning of the questionnaires.  
48  
49  
50  
51  
52  
53  
54  
55  
56  
57  
58  
59  
60

### Sample

A total of 19430 adolescents born between 1993 and 1995 were invited to participate, of which 10220 agreed, yielding a participation rate of 53%. The mean age of those participating was 17 years, and the sample included more girls (53.5% / n=5252) than boys (46.5% / n=4594). The majority (97.9% / n=9219) were high school students.

Sleep variables were checked for validity of answers, resulting in data from 374 subjects being excluded due to obvious invalid responses. For example, when calculating sleep duration and sleep efficiency, individuals with negative values on these computed variables were excluded from further the analyses. Thus, the total sample size in the current study was 9875.

### Instruments

#### *Use of electronic devices at bedtime*

As there are very few well-validated questionnaires assessing use of modern electronic devices, we chose to develop a new instrument assessing such use across a wide range of new electronic devices. This was done after a thorough review of the literature. Adolescents reported use of six different electronic media devices and if they used them in the bedroom the last hour before they went to sleep. The phrasing of the question was: "How many of the listed electronic devices do you use in your bedroom the last hour before going to sleep?" Drag and drop function was incorporated as a feature of the web-based questionnaire. An image with corresponding description of the device was dragged and dropped to indicate use, and ranked by frequency of use with the most frequently used device in the top box etc. The indicated devices comprised PC, cell phone, MP3 player, tablet, game console and TV. No information on the time frame was available, for example if the electronic devices had been used for shorter or longer periods of time (days, weeks or months).

#### *Screen time during daytime*

Time spent on screen-based activity was assessed by the following question: "Outside of school hours how much time do you usually spend on the following on weekdays 1) TV-games (PlayStation, Xbox, Wii etc.), 2) PC games, 3) Internet chatting, 4) writing and reading emails, 5) using the PC for other purposes?" The responses alternatives were: "no time", "less than ½ hour", "½ hour to 1 hour", "2-3 hours", "4 hours" and "more than 4 hours". A similar question has been used in the Health Behaviour in School-aged Children (HBSC) studies [18]. A 2 hour cut-off was used as most recommendations for screen-based

1  
2  
3 activities restrict this to about 2 hours per day and this cut-off has also been used in previous  
4 relevant studies [19][20, 21]  
5  
6

### 7 *Sleep variables*

8  
9 The adolescents' typical bedtime and rise time were indicated in hours and minutes  
10 using a scroll down menu with five minutes intervals and were reported separately for  
11 weekend and weekdays. Time in bed (TIB) was calculated by subtracting bedtime from rise  
12 time. Typical sleep onset latency (SOL) and wake after sleep onset (WASO) were indicated  
13 in hours and minutes using a scroll down menu with five minutes intervals, and sleep duration  
14 was defined as TIB minus SOL and WASO. Sleep duration was split into 10 categories, and  
15 SOL was categorized as either more or less than 60 minutes. Subjective sleep need (each  
16 individual's own perceived sleep need) was reported in hours and minutes on a scroll down  
17 menu with five minutes intervals, and the phrasing of the question was "How much sleep do  
18 you need to feel rested?" Sleep deficit was calculated separately for weekends and weekdays,  
19 subtracting total sleep duration from subjective sleep need. Weekday sleep deficiency is used  
20 in the present study, and was dichotomized into <2 hours and ≥2 hours. For more information  
21 on sleep variables and sleep patterns in the present study see [22]  
22  
23  
24  
25  
26  
27  
28  
29  
30  
31  
32  
33  
34  
35  
36  
37  
38  
39

### 40 **Statistics**

41 IBM SPSS Statistics 22 for Windows (SPSS Inc., Chicago, Ill) was used for all analyses. Chi-  
42 square tests were used to examine gender differences in use of electronic devices and daytime  
43 screen use. Independent sample t-tests and chi-square tests were used to examine the  
44 associations between sleep duration, electronic devices and daytime screen use. Logistic  
45 regression analyses using SOL of more than 60 minutes and sleep deficiency as outcome  
46 variables were conducted for all electronic devices and daytime screen (exposure variables).  
47 Multinomial logistic regression analyses were conducted with short sleep duration as the  
48 outcome variable (8-9 hours as the reference category) and electronic devices and daytime  
49 screen as the exposure variables. To investigate whether odds-ratios differed significantly  
50 between genders, we calculated the relative risk ratio (RRR) [23]. As these analyses yielded  
51 no significant gender differences, the results of the logistic regressions are presented without  
52  
53  
54  
55  
56  
57  
58  
59  
60



gender stratification.

### **Ethics**

The study was approved by the Regional Committee for Medical and Health Research Ethics (REC) in Western Norway. In accordance with the regulations from the REC and Norwegian health authorities, adolescents aged 16 years and older can make decisions regarding their own health, and may thus give consent themselves to participate in health studies. Parents/guardians have the right to be informed, and in the current study, all parents/guardians received written information about the study in advance. If the adolescents decided to participate they indicated if they wanted to participate in the study as a whole, or they could choose three options to specify their level of consent: 1) to complete the questionnaire, 2) obtain information from parent questionnaire 3) linking data to national registries.

## **RESULTS**

### **Use of electronic devices before bedtime and daytime screen time**

The use of electronic devices stratified by gender is shown in Figure 1. Most adolescents used an electronic device in the hour before going to sleep. Some gender differences emerged, with more boys using game consoles, whereas girls reported higher use of cell phones and Mp3 players ( $P_s < .001$ ).

-----  
Please insert Figure 1 about here  
-----

The average number of hours of screen time stratified by gender is presented in Figure 2. Girls reported significantly more online chatting and other PC use, while boys reported more console games and PC games (all  $P_s < .001$ ).

-----  
Please insert Figure 2 about here  
-----

1  
2  
3  
4  
5  
6  
7  
8  
9  
10  
11  
12  
13  
14  
15  
16  
17  
18  
19  
20  
21  
22  
23

### **Electronic devices at bedtime and daytime screen use in relation to long sleep onset latency**

The odds ratios for reporting SOL of more than 60 minutes were calculated separately for each electronic device (Table 1). Use of PC, cell phone, Mp3-player, tablet, game console and TV were all associated with increased odds of SOL of more than 60 minutes.

Daytime screen use showed the same pattern. A total screen time after school hours for more than four hours was related to long SOL (OR: 1.49, CI95% 1.36-1.64). When analyses were conducted separately for each electronic device, all daytime screen use over two hours was significantly associated with long SOL (see Table 1).

24  
25  
26  
27  
28  
29  
30  
31  
32  
33  
34  
35  
36  
37  
38  
39  
40  
41  
42

### **Electronic devices at bedtime and daytime screen use in relation to sleep deficit**

The odds for sleep deficiency of more than two hours were calculated separately for each electronic device (Table 1). Use of PC, cell phone, Mp3-player, game console and TV in the hour before going to sleep were all associated with increased odds of sleep deficiency.

Total daytime screen use after school of more than four hours was positively related to sleep deficit. When analyses were conducted separately for different electronic devices, all daytime screen use over two hours were significantly associated with a sleep deficit.

-----  
Please insert Table 1 about here  
-----

43  
44  
45  
46  
47  
48  
49  
50  
51  
52  
53  
54  
55  
56  
57  
58  
59  
60

### **Electronic devices at bedtime and daytime screen use in relation to sleep duration**

Hours of daytime screen use are presented in Figure 3. The odds for reporting short sleep duration (covering 4 different categories), with 8-9 hours as the reference category, was calculated separately for each electronic device (Table 2). A dose-response relationship emerged with the highest risk of short sleep duration under five hours, exemplified by the association between PC use and risk of less than five hours of sleep (OR: 2.70 CI95% 2.14-3.39), while the risk for 7-8 hours of sleep equaled an OR=1.64 (CI95% 1.38-1.96).

-----  
Please insert Figure 3 and Table 2 about here  
-----

1  
2  
3 Daytime screen use showed a similar pattern. Total screen time above 4 hours was associated  
4 with an increased risk of less than five hours of sleep (OR: 3.64 CI95% 3.06-4.33), while the  
5 risk for 7-8 hours of sleep was OR=1.29 (CI95% 1.12-1.49). See Table 2 for details.  
6  
7

### 8 9 **Multitasking of electronic devices at bedtime**

10 The risk of SOL of more than 60 minutes was increased in adolescents using 4 devices or  
11 more compared to adolescents using only one device (OR=1.26 (95% CI 1.07-1.49). The ORs  
12 for sleep deficiency for multitasking 2-3 devices was 1.50 (95% CI 1.26-1.79) and 4 or more  
13 devices 1.75 (95% CI 1.46-2.08), in comparison to using only one device. The ORs for  
14 sleeping less than 5 hours among multitasking teens ranged from 2.2 to 2.8 (depending on  
15 number of used devices) compared to only one device. The corresponding OR-ranges for  
16 sleeping 5-6 hour, 6-7 hours and 7-8 hours were 1.8-2.4, 1.9-2.1, and 1.4-1.5 respectively (all  
17  $P$ s<.001 compared to sleeping 8-9 hours).  
18  
19  
20  
21  
22  
23  
24  
25  
26

## 27 **DISCUSSION**

28  
29  
30 In short, almost all adolescents reported using one or more electronic devices during the last  
31 hour before bedtime. Extensive use of these devices was significantly and positively  
32 associated with SOL and sleep deficiency, with an inverse dose-response relationship  
33 between sleep duration and media use.  
34  
35  
36

37  
38 The present study adds to the literature by showing that both day- and bedtime use of  
39 electronic devices across a range of platforms, including newer technology, are related to  
40 several sleep parameters. While the frequency of use differed between the various devices,  
41 the relation between different types of electronic devices and sleep remained significant. This  
42 suggests that the established relationship between TV and sleep found in previous studies [5,  
43 6] can be generalized to newer technology. The relation between sleep and PC-use that has  
44 been demonstrated in previous studies in relation to poor sleep [8] and reduced time in bed [9,  
45 10], was further corroborated by the results of the present study as PC was both one of the  
46 most frequently used platforms and showed also the highest risks for short sleep duration and  
47 sleep deficiency. Using multiple devices before bedtime was related to longer SOL and  
48 shorter sleep duration compared to using only one electronic device.  
49  
50  
51  
52  
53  
54

55  
56 There are probably multiple pathways explaining the associations between sleep and  
57 electronic devices. Media use may directly affect sleep by replacing it due to its time  
58  
59  
60

1  
2  
3 consuming nature, or may interfere with sleep through increased psychophysiological arousal.  
4 Alternatively, the bright light exposure inherent in most electronic media devices [12] may  
5 interfere with sleep by delaying the circadian rhythm when exposure takes place in the  
6 evening [14] and/or by causing an immediate activation in itself [11, 15].  
7  
8  
9

10  
11 The relative importance of different devices is still a matter of discussion, although devices  
12 used for social communication have been proposed to have an especially negative effect on  
13 sleep [2]. However, the present study showed few statistically significant differences between  
14 the electronic devices. Further, both multitasking and the multi-functionality (e.g., homework  
15 vs. recreational use) of most platforms suggest that findings concerning the relationship  
16 between sleep and specific electronic devices and their type of use should be carefully  
17 interpreted.  
18  
19  
20  
21

22  
23 The present study found that the associations between electronic media use and sleep were  
24 robust across the included sleep parameters, including SOL, sleep deficit and sleep duration,  
25 extending on the previous findings on the relationship between electronic media use and time  
26 in bed [9, 10]. The scarcity of similar studies makes the current findings hard to compare. In  
27 the 2010 review it was reported that two studies of adolescents assessed SOL [5, 24], but after  
28 carefully reviewing these papers we could not find support for this. While the present study  
29 found a higher risk of long SOL associated with electronic media use, the exact cut-offs for  
30 long SOL at different developmental levels are not settled. Long SOL is usually defined as 31  
31 minutes or more in adults [25], but as adolescents may experience longer SOL due to  
32 biologically based delayed circadian rhythms occurring during puberty [26], we decided to  
33 use a cut-off of 60 minutes.  
34  
35  
36  
37  
38  
39  
40

41  
42 Sleep need varies between individuals, and one can argue that adolescents with less need of  
43 sleep may spend more time on electronic devices than individuals with more extensive sleep  
44 needs. The inclusion of perceived sleep need and sleep deficiency defined by subtracting the  
45 actual sleep from their perceived sleep allowed us to explore this further. In the current study,  
46 a sleep duration of 8-9 hours was chosen as the reference category for all regression analyses,  
47 as this was the average sleep need reported by the adolescents [4], and also because this  
48 corresponds well with experts' recommended sleep need in this age group [26]. A strong  
49 relationship between use of electronic devices and subjective sleep deficiency was present,  
50 thus indicating that use of electronic devices is related to sleeping less than what themselves  
51 and experts deem necessary [26].  
52  
53  
54  
55  
56  
57  
58  
59  
60

1  
2  
3 There are some methodological limitations of the present study that should be noted. First, the  
4 cross-sectional design prevents us from drawing inferences about directionality. An indication  
5 of a causal relationship is the dose-response relationship between sleep duration and media  
6 use. In terms of a reverse causality, it might be that some adolescents actively use media and  
7 technology as a sleeping aid [27], or to counteract boredom when not being able to sleep.  
8 Most likely the relationship between poor sleep and electronic media use reflects a self-  
9 perpetuating cycle. Second, the phrasing of the questions assessing daytime and bedtime use  
10 of electronic devices does not rule out some overlap between the two items. For example,  
11 when adolescents report a total screen time use of 6+ hours, it is not unlikely that some  
12 adolescents include the last hour before going to sleep. Along the same lines, we had no  
13 information on the purpose of the screen time use, and as such we were not able to single out  
14 school-related work. Also, as the items assessing bedtime use were phrased to assess use in  
15 the bedroom only, we had no information on screen use in other rooms, and how these might  
16 be related to sleep. In addition it cannot be ruled out that some adolescents multitask and use  
17 electronic media in parallel with other activities. Third, the sleep measurements were solely  
18 based on self-reports, which renders the results susceptible to influence from the common  
19 method bias [28]. Although self-reported sleep parameters, including SOL and WASO  
20 typically differ from those obtained from objective assessments [29], recent studies have  
21 showed that self-report sleep assessments can be recommended for the characterization of  
22 sleep parameters in both clinical and population-based research [30]. Also, the accuracy of  
23 self-reported SOL and WASO are generally better among adolescents than in older adults  
24 [31], and a study of young adolescents in Hong Kong recently found good agreement between  
25 actigraphy measured and questionnaire reported sleep durations [32]. Fourth, there may be  
26 confounders, variables that are related to both sleep and media use, that were not assessed,  
27 e.g. emotional and behavioral problems. Further, the clinical significance of the results may  
28 be discussed as some of the increased risks were small in magnitude, and how much added  
29 functional significance these represent needs further exploration. Also, attrition from the  
30 study could affect generalizability, with a response rate of about 53% and with adolescents in  
31 schools overrepresented. The problem with non-participation in survey research seems  
32 unfortunately to be on the rise [33]. Official data show that in 2012, 92% of all adolescents in  
33 Norway aged 16-18 attended high school [34], compared to 98% in the current study. Based  
34 on previous research from the former waves of the Bergen Child Study (the same population  
35 as the current study), non-participants had more emotional and behavioural problems, albeit  
36 small in magnitude, in comparison the participants. [35]. It is therefore likely that the  
37 prevalence of sleep problems may be underestimated in the current study. Finally, the cross-  
38 sectional design of the study restricts causal attributions, and prospective studies are still  
39 needed to disentangle the temporal relationship.  
40  
41  
42  
43  
44  
45  
46  
47  
48  
49  
50  
51  
52  
53  
54  
55  
56  
57  
58  
59  
60

1  
2  
3  
4 The assessment method may also have influenced the results. While the daytime screen use  
5 was based on a previous validated instrument [18], the questions used for the assessment of  
6 bedtime use of electronic devices were new. A broader scope compared to most previous  
7 studies, including questions about cell phones and Mp3-players as well as newer technology  
8 such as tablets, is a strength of the present study. Screen time use cannot be regarded as the  
9 absolute time spent in front of a screen, as other platforms may not be included and there  
10 might be an overlap between the daytime and bedtime use.  
11  
12  
13  
14

15  
16  
17 Parallel with the rapid change in technology, the recommendations for healthy media use  
18 given to parents and adolescence also need updating, and age-specific guidelines regarding  
19 the quantity and timing of electronic media use should be developed and made known to the  
20 public [12]. The current recommendation is not to have a TV in the bedroom [36]. It seems,  
21 however, that there may be other electronic devices exerting the same negative influence on  
22 sleep, such as PCs and mobile phones. The results confirm recommendations for restricting  
23 media use in general. The combination of secular trends to impaired sleep (see[3] and the  
24 established relationship to health and school achievement [37] underscore the importance of  
25 prevention. The scope of the problem suggests that this is a public health issue and that  
26 primary prevention may be needed. Parent-set bedtimes have been shown to be related to  
27 good sleep hygiene in adolescents [38] and an increased parental involvement in technology  
28 use could be a recommendation based on the findings, but this needs further evidence. While  
29 technology use may be a source of sleep deficiency, this may also serve as a medium of  
30 intervention, as internet-based interventions have proven to be effective and cost-efficient  
31 modes of treating sleep problems [39].  
32  
33  
34  
35  
36  
37  
38  
39  
40  
41  
42  
43  
44  
45  
46  
47  
48  
49  
50  
51  
52  
53  
54  
55  
56  
57  
58  
59  
60

### CONTRIBUTORSHIP STATEMENT

Author KM, AJL, RJ and MH were involved in acquisition of data. Authors MH and BS were responsible for conception and design of the study. BS and MH did the analysis and interpretation of data. MH, BS and SP drafted the manuscript. Authors KM, RJ and AJL gave critical revision of the manuscript for important intellectual content. KM and RJ obtained funding, and KM, RJ and AJL gave materialistic, technical or material support. Authors MH and BS had full access to all the data in the study and takes responsibility for the integrity of the data and the accuracy of the data analysis.

### COMPETING INTERESTS

The authors declare that they have no competing interests.

### FUNDING

The youth@hordaland study was funded by Uni Research Health and Norwegian Directorate for Health and Social Affairs.

### DATA SHARING

Data for research projects from the population-based youth@hordaland study may be made available at request from Regional Centre for Child and Youth Mental Health and Child Welfare, Uni Research Health, Bergen, Norway.

### ACKNOWLEDGEMENTS

The authors would like to thank Regional Centre for Child and Youth Mental Health and Child Welfare at Uni Research Health for making the collection of the data, and making the data available for this study. The authors would like to thank the participants for their time and effort.

## REFERENCES

1. National Sleep Foundation: **Sleep In America Poll**. In: <http://www.sleepfoundation.org/article/sleep-america-polls/2006-teens-and-sleep>. vol. 2006; 2006.
2. Van den Bulck J. Text messaging as a cause of sleep interruption in adolescents, evidence from a cross-sectional study *J Sleep Res* 2003;12:263.
3. Pallesen S, Hetland J, Sivertsen B *et al*. Time trends in sleep-onset difficulties among Norwegian adolescents: 1983--2005 *Scand J Public Health* 2008;36:889-95.
4. Hysing M, Pallesen S, Stormark KM *et al*. Sleep patterns and insomnia among adolescents: a population-based study *Journal of sleep research* 2013;22:549-56.
5. Van den Bulck J. The effects of media on sleep *Adolesc Med State Art Rev* 2010;21:418-29, vii.
6. Adam EK, Snell EK, Pendry P. Sleep timing and quantity in ecological and family context: a nationally representative time-diary study *J Fam Psychol* 2007;21:4-19.
7. Thorleifsdottir B, Bjornsson JK, Benediktsdottir B *et al*. Sleep and sleep habits from childhood to young adulthood over a 10-year period *J Psychosom Res* 2002;53:529-37.
8. Dorofaeff TF, Denny S. Sleep and adolescence. Do New Zealand teenagers get enough? *J Paediatr Child Health* 2006;42:515-20.
9. Punamaki RL, Wallenius M, Nygard CH *et al*. Use of information and communication technology (ICT) and perceived health in adolescence: the role of sleeping habits and waking-time tiredness *J Adolesc* 2007;30:569-85.
10. Yen CF, Ko CH, Yen JY *et al*. The multidimensional correlates associated with short nocturnal sleep duration and subjective insomnia among Taiwanese adolescents *Sleep* 2008;31:1515-25.
11. Weaver E, Gradisar M, Dohnt H *et al*. The effect of presleep video-game playing on adolescent sleep *J Clin Sleep Med* 2010;6:184-9.
12. Cain N, Gradisar M. Electronic media use and sleep in school-aged children and adolescents: A review *Sleep medicine* 2010;11:735-42.
13. Weissbluth M, Poncher J, Given G *et al*. Sleep duration and television viewing *J Pediatr* 1981;99:486-8.
14. Khalsa SB, Jewett ME, Cajochen C *et al*. A phase response curve to single bright light pulses in human subjects *J Physiol* 2003;549:945-52.
15. Campbell SS, Dijk DJ, Boulos Z *et al*. Light treatment for sleep disorders: consensus report. III. Alerting and activating effects *J Biol Rhythms* 1995;10:129-32.
16. Thomee S, Dellve L, Harenstam A *et al*. Perceived connections between information and communication technology use and mental symptoms among young adults - a qualitative study *BMC Public Health* 2010;10:66.
17. Hauri P, Fisher J. Persistent psychophysiologic (learned) insomnia *Sleep* 1986;9:38-53.



- 1
  - 2
  - 3
  - 4
  - 5
  - 6
  - 7
  - 8
  - 9
  - 10
  - 11
  - 12
  - 13
  - 14
  - 15
  - 16
  - 17
  - 18
  - 19
  - 20
  - 21
  - 22
  - 23
  - 24
  - 25
  - 26
  - 27
  - 28
  - 29
  - 30
  - 31
  - 32
  - 33
  - 34
  - 35
  - 36
  - 37
  - 38
  - 39
  - 40
  - 41
  - 42
  - 43
  - 44
  - 45
  - 46
  - 47
  - 48
  - 49
  - 50
  - 51
  - 52
  - 53
  - 54
  - 55
  - 56
  - 57
  - 58
  - 59
  - 60
18. Melkevik O, Torsheim T, Iannotti RJ *et al*. Is spending time in screen-based sedentary behaviors associated with less physical activity: a cross national investigation *The international journal of behavioral nutrition and physical activity* 2010;7:46.
19. Bar-on ME. The effects of television on child health: implications and recommendations *Archives of disease in childhood* 2000;83:289-92.
20. Owens J, Maxim R, McGuinn M *et al*. Television-viewing habits and sleep disturbance in school children *Pediatrics* 1999;104:e27.
21. Alexandru G, Michikazu S, Shimako H *et al*. Epidemiological aspects of self-reported sleep onset latency in Japanese junior high school children *J Sleep Res* 2006;15:266-75.
22. Hysing M, Pallesen S, Stormark KM *et al*. Sleep patterns and insomnia among adolescents: a population-based study *Journal of sleep research* 2013;22:549-56.
23. Altman DG, Bland JM. Interaction revisited: the difference between two estimates *Bmj* 2003;326:219.
24. Johnson JG, Cohen P, Kasen S *et al*. Association between television viewing and sleep problems during adolescence and early adulthood *Arch Pediatr Adolesc Med* 2004;158:562-8.
25. Lichstein KL, Durrence HH, Taylor DJ *et al*. Quantitative criteria for insomnia *Behav Res Ther* 2003;41:427-45.
26. Carskadon MA, Harvey K, Duke P *et al*. Pubertal changes in daytime sleepiness *Sleep* 1980;2:453-60.
27. Eggermont S, Van den Bulck J. Nodding off or switching off? The use of popular media as a sleep aid in secondary-school children *J Paediatr Child Health* 2006;42:428-33.
28. Podsakoff PM, MacKenzie SB, Lee JY *et al*. Common method biases in behavioral research: A critical review of the literature and recommended remedies *Journal of Applied Psychology* 2003;88:879-903.
29. Lauderdale DS, Knutson KL, Yan LL *et al*. Self-reported and measured sleep duration: how similar are they? *Epidemiology* 2008;19:838-45.
30. Zinkhan M, Berger K, Hense S *et al*. Agreement of different methods for assessing sleep characteristics: a comparison of two actigraphs, wrist and hip placement, and self-report with polysomnography *Sleep medicine* 2014.
31. Dillon HR, Lichstein KL, Dautovich ND *et al*. Variability in self-reported normal sleep across the adult age span *J Gerontol B Psychol Sci Soc Sci* 2014.
32. Kong AP, Wing YK, Choi KC *et al*. Associations of sleep duration with obesity and serum lipid profile in children and adolescents *Sleep medicine* 2011;12:659-65.
33. Morton SMB, Bandara DK, Robinson EM *et al*. In the 21st Century, what is an acceptable response rate? *Aust Nz J Publ Heal* 2012;36:106-8.
34. The Directorate of Integration and Diversity (IMDi): **[Education participation in high schools]**. <http://www.imdi.no/no/Fakta-og-statistikk/Fakta-og-statistikk/Utdanning/?tab=chr>; 2012.

- 1  
2  
3 35. Stormark KM, Heiervang E, Heimann M *et al*. Predicting nonresponse bias from teacher  
4 ratings of mental health problems in primary school children *J Abnorm Child Psychol*  
5 2008;36:411-9.  
6  
7 36. Gentile DA, Oberg C, Sherwood NE *et al*. Well-child visits in the video age: pediatricians and  
8 the American Academy of Pediatrics' guidelines for children's media use *Pediatrics*  
9 2004;114:1235-41.  
10  
11 37. Dewald JF, Meijer AM, Oort FJ *et al*. The influence of sleep quality, sleep duration and  
12 sleepiness on school performance in children and adolescents: A meta-analytic review *Sleep*  
13 *medicine reviews* 2010;14:179-89.  
14  
15 38. Short MA, Gradisar M, Wright H *et al*. Time for bed: parent-set bedtimes associated with  
16 improved sleep and daytime functioning in adolescents *Sleep* 2011;34:797-800.  
17  
18 39. Sivertsen B, Vedaa O, Nordgreen T. The future of insomnia treatment-the challenge of  
19 implementation *Sleep* 2013;36:303-4.  
20  
21  
22  
23  
24  
25  
26  
27  
28  
29  
30  
31  
32  
33  
34  
35  
36  
37  
38  
39  
40  
41  
42  
43  
44  
45  
46  
47  
48  
49  
50  
51  
52  
53  
54  
55  
56  
57  
58  
59  
60

Table 1. Use of electronic devices in the last hour before bedtime and daytime screen use as risk factors for sleep onset latency (SOL) of 60 minutes or more and sleep deficiency of 2 hours or more in the youth@hordaland study (n=9846).<sup>§</sup>

|                                                       | SOL (≥60 minutes)   |           | Sleep deficit (≥2 hours) |           |
|-------------------------------------------------------|---------------------|-----------|--------------------------|-----------|
|                                                       | OR                  | 95% CI    | OR                       | 95% CI    |
| <b>Electronic devices in last hour before bedtime</b> |                     |           |                          |           |
| PC                                                    | 1.52 <sup>***</sup> | 1.34-1.71 | 1.53 <sup>***</sup>      | 1.34-1.76 |
| Cell phone                                            | 1.48 <sup>***</sup> | 1.30-1.68 | 1.35 <sup>***</sup>      | 1.17-1.55 |
| MP3-Player                                            | 1.36 <sup>***</sup> | 1.25-1.48 | 1.21 <sup>***</sup>      | 1.10-1.32 |
| Tablet                                                | 1.18 <sup>***</sup> | 1.08-1.29 | 1.12 <sup>†</sup>        | 1.02-1.23 |
| Console                                               | 1.13 <sup>***</sup> | 1.04-1.23 | 1.20 <sup>***</sup>      | 1.10-1.32 |
| TV                                                    | 1.19 <sup>***</sup> | 1.10-1.30 | 1.36 <sup>***</sup>      | 1.24-1.49 |
| <b>Daytime screen use</b>                             |                     |           |                          |           |
| Total screen time (4 hours +)                         | 1.49 <sup>***</sup> | 1.36-1.64 | 1.72 <sup>***</sup>      | 1.56-1.89 |
| Console games (2 hours +)                             | 1.20 <sup>†</sup>   | 1.04-1.38 | 1.31 <sup>***</sup>      | 1.13-1.52 |
| PC Games (2 hours +)                                  | 1.19 <sup>**</sup>  | 1.05-1.34 | 1.41 <sup>***</sup>      | 1.25-1.60 |
| Online chat (2 hours +)                               | 1.43 <sup>***</sup> | 1.31-1.56 | 1.87 <sup>***</sup>      | 1.70-2.05 |
| E-mail (2 hours +)                                    | 1.93 <sup>***</sup> | 1.55-2.40 | 1.68 <sup>***</sup>      | 1.31-2.14 |
| Other PC use (2 hours +)                              | 1.38 <sup>***</sup> | 1.26-1.51 | 1.37 <sup>***</sup>      | 1.25-1.51 |

§ Reference: SOL < 60 minutes  
p<.05; <sup>†</sup>p<.01; <sup>\*\*</sup>p<.001;

**Table 2.** Use of electronic devices in last hour before going to sleep and daytime screen use as risk factors for short sleep duration among girls and boys in the youth@hordaland study (n=9846).<sup>§</sup>

|                                                       | < 5hours            |           | 5-6 hours           |           | 6-7 hours           |           | 7-8 hours           |           |
|-------------------------------------------------------|---------------------|-----------|---------------------|-----------|---------------------|-----------|---------------------|-----------|
|                                                       | OR                  | 95% CI    |
| <b>Electronic devices in last hour before bedtime</b> |                     |           |                     |           |                     |           |                     |           |
| PC                                                    | 2.70 <sup>***</sup> | 2.14-3.39 | 2.69 <sup>***</sup> | 2.09-3.46 | 2.30 <sup>***</sup> | 1.90-2.79 | 1.64 <sup>***</sup> | 1.38-1.96 |
| Cell phone                                            | 1.85 <sup>***</sup> | 1.45-2.35 | 1.65 <sup>***</sup> | 1.28-2.13 | 1.75 <sup>***</sup> | 1.42-2.15 | 1.50 <sup>***</sup> | 1.24-1.83 |
| MP3-Player                                            | 1.52 <sup>***</sup> | 1.29-1.78 | 1.46 <sup>***</sup> | 1.12-1.73 | 1.33 <sup>***</sup> | 1.15-1.53 | 1.19 <sup>*</sup>   | 1.03-1.36 |
| iPad or other tablet                                  | 1.19 <sup>*</sup>   | 1.01-1.41 | 1.29 <sup>**</sup>  | 1.09-1.54 | 1.18 <sup>*</sup>   | 1.92-1.37 | 1.10                | 0.95-1.28 |
| Console                                               | 1.40 <sup>***</sup> | 1.19-1.64 | 1.38 <sup>***</sup> | 1.17-1.64 | 1.27 <sup>**</sup>  | 1.09-1.47 | 1.17 <sup>*</sup>   | 1.01-1.35 |
| TV                                                    | 1.51 <sup>***</sup> | 1.29-1.77 | 1.44 <sup>***</sup> | 1.22-1.71 | 1.35 <sup>***</sup> | 1.17-1.56 | 1.16 <sup>*</sup>   | 1.01-1.33 |
| <b>Daytime screen use</b>                             |                     |           |                     |           |                     |           |                     |           |
| Total screen time (4 hours +)                         | 3.64 <sup>***</sup> | 3.06-4.33 | 2.66 <sup>***</sup> | 2.22-3.19 | 2.07 <sup>***</sup> | 1.79-2.40 | 1.29 <sup>***</sup> | 1.12-1.49 |
| Console games (2 hours +)                             | 2.03 <sup>***</sup> | 1.53-2.69 | 1.73 <sup>***</sup> | 1.28-2.35 | 1.58 <sup>**</sup>  | 1.21-2.06 | 1.20                | 0.92-1.58 |
| PC Games (2 hours +)                                  | 1.90 <sup>***</sup> | 1.51-2.38 | 1.22                | 0.95-1.58 | 1.39 <sup>**</sup>  | 1.12-1.73 | 1.06                | 0.86-1.32 |
| Online chat (2 hours +)                               | 3.58 <sup>***</sup> | 3.03-4.24 | 2.79 <sup>***</sup> | 2.33-3.33 | 1.98 <sup>***</sup> | 1.70-2.30 | 1.31 <sup>***</sup> | 1.13-1.51 |
| E-mail (2 hours +)                                    | 3.28 <sup>***</sup> | 2.07-5.16 | 2.42 <sup>***</sup> | 1.48-3.95 | 1.34                | 0.84-2.14 | 1.14                | 0.72-1.82 |
| Other PC use (2 hours +)                              | 2.06 <sup>***</sup> | 1.74-2.42 | 2.04 <sup>***</sup> | 1.71-2.44 | 1.54 <sup>***</sup> | 1.33-1.78 | 1.21 <sup>**</sup>  | 1.05-1.39 |

<sup>§</sup> Reference: 8-9 hours  
p<.05; \*\* p<.01; \*\*\* p<.001;

**FIGURE LEGENDS**

Figure 1: Use of electronic devices during the last hour before bedtime among girls and boys in the youth@hordaland study (n=9846). Error bars represent 95% confidence intervals.

Figure 2: Average daytime screen use among girls and boys in the youth@hordaland study (n=9846). Error bars represent 95% confidence intervals.

Figure 3: Sleep duration and hours of screen use among adolescents in the youth@hordaland study (n=9846).

For peer review only

# Sleep and Use of Electronic Devices in Adolescence: Results from a Large Population-Based Study

Mari Hysing PhD<sup>a</sup>, Ståle Pallesen PhD<sup>b,c</sup>, Kjell Morten Stormark PhD<sup>a</sup>,  
Reidar Jakobsen PhD<sup>a</sup>, Astri J. Lundervold PhD<sup>a,d</sup>, Børge Sivertsen PhD<sup>e,f,g</sup>

- a) Regional Centre for Child and Youth Mental Health and Child Welfare, Uni Research Health, Bergen, P.O.Box 7810, N-5020 Bergen, Norway
- b) Department of Psychosocial Science, University of Bergen, N-5015 Bergen, Norway.
- c) Norwegian Competence Center for Sleep Disorders, Haukeland University Hospital, Jonas Lies vei 65, 5021 Bergen, Norway
- d) Department of Biological and Medical Psychology, University of Bergen, Jonas Lies vei 91, 5009 Bergen, Norway
- e) Division of Mental Health, Norwegian Institute of Public Health, Kalfarveien 31, 5018 Bergen, Norway
- f) Uni Research Health Bergen, P.O.Box 7810, N-5020 Bergen, Norway
- g) Department of Psychiatry, Helse Fonna HF, P.O.Box 2170, N-5504 Haugesund, Norway

**Corresponding author:** Dr. Mari Hysing, Regional Centre for Child and Youth Mental Health and Child Welfare, Postboks 7810, 5020 Bergen, Norway, Email: [mari.hysing@uni.no](mailto:mari.hysing@uni.no); Phone: +47 55 58 86 98

**Running title:** Sleep in the digital adolescent

**Keywords:** sleep; media use; epidemiology; adolescents

Total page count: 20

Word count for abstract: 250 (max 300)

Word count for body text: 3,774 (max 4000)

Number of tables: 2

Number of figures: 3

## ABSTRACT

**Objectives:** Adolescents spend increasingly more time on electronic devices, and sleep deficiency rising in adolescents constitutes a major public health concern. The aim of the present study was to investigate daytime screen use and use of electronic devices before bedtime in relation to sleep.

**Design:** A large cross-sectional population-based survey study from 2012, the youth@hordaland study, in Hordaland County in Norway.

**Setting:** Cross-sectional general community-based study.

**Participants:** 9,846 adolescents from three age cohorts aged 16-19. The main independent variables were type and frequency of electronic devices at bedtime and hours of screen-time during leisure time.

**Outcomes:** Sleep variables calculated based on self-report including bedtime, rise time, time in bed, sleep duration, sleep onset latency and wake after sleep onset.

**Results:** Adolescents spent a large amount of time during the day and at bedtime using electronic devices. Both day- and bedtime use of electronic devices were related to sleep measures, with an increased risk of short sleep duration, long sleep onset latency and increased sleep deficiency. A dose-response relationship emerged between sleep duration and use of electronic devices, exemplified by the association between PC use and risk of less than five hours of sleep (OR=2.70, CI95% 2.14-3.39), and a comparable lower odds for 7-8 hours of sleep (OR=1.64, CI95% 1.38-1.96).

**Conclusions:** Use of electronic devices is frequent in adolescence, both during the day and at bedtime. The results demonstrate a negative relation between use of technology and sleep, suggesting that recommendations on healthy media use could include restrictions on electronic devices.

## STRENGTHS AND LIMITATIONS OF THIS STUDY

- This study employed a large well-defined population-based sample of adolescents.
- The data employed in this study is from a recent data collection.
- This study included several detailed measures of sleep patterns and sleep problems, as well as detailed measures of media use.
- The cross-sectional design of this study precluded any causal inference.
- This sample had a limited age-range.

## BACKGROUND

In the last decade we have witnessed a sharp increase in the availability and use of electronic devices such as smart phones, video game consoles, television, audio players, computers and tablets. Due to this, electronic devices have become an integral part of adolescent life, as exemplified by almost all American adolescents (97%) reporting to have at least one electronic media device in their bedroom [1]. In addition to the entertaining aspects, electronic devices play an important part in the social lives of adolescents. The constant change towards a more active, stimulating and social media use may however affect sleep in a negative way [2].

Parallel with the increased use of electronic devices, there has been a shift towards poorer sleep over the past decades among adolescents [3]. Recent epidemiological data on adolescent sleep shows that it on average is characterized by late bedtime, long sleep onset latency (SOL) and a short sleep duration of approximately 6 ½ hours on weekdays contributing to a daily sleep deficiency of about two hours [4].

The high rate of media use in adolescence may be one factor that is related to the short sleep duration and late bedtimes. TV use has consistently and inversely been associated with sleep duration [5, 6], as well as delayed bedtime and wake-up time in adolescents [7]. A high level of computer use has been found to be related to sleep problems [8], reduced time in bed [9, 10] and increased sleep onset latency [11]. Overall, electronic media use has been consistently linked with delayed bedtime and shortened sleep according to a review of the literature. However, some shortcomings in the existing literature were noted in the review. Future studies were recommended to measure sleep by self-report estimates of sleep parameters such as bedtime, sleep onset latency, time spent awake after sleep onset, wake-up time, and rise time, each estimated separately for weekdays and weekend days [12]. Newer technology, such as portable electronic devices has also been recommended to be included in future studies on this topic. Related to this, many of the previous studies have restricted their investigation to only one or two electronic devices [2, 10, 13]. Whether the same pattern of sleep problems is present across type of electronic devices is thus uncertain.

The mechanisms behind the relationships between use of electronic media devices and sleep problems are not well established, but a theoretical model of the relationship has been proposed [12], suggesting several possible mechanisms. According to this model, media use may directly affect sleep by replacing it due to its time consuming nature, or it may interfere with sleep through increased psychophysiological arousal caused by the stimulating content of the material, or through bright light exposure inherent in most electronic media devices



1  
2  
3 [12]. Bright light may impact sleep in two ways; by delaying the circadian rhythm when  
4 exposure takes place in the evening [14] and also by causing an immediate activation in itself  
5 [11, 15]. According to the aforementioned model sleep may also be negatively impacted by  
6 electromagnetic radiation [12]. Another proposed mechanism by which electronic media may  
7 impair sleep relates to physical discomfort, such as muscular pain and headache which can be  
8 caused by prolonged media use (e.g., computer games) [16]. Furthermore, repeated use of  
9 electronic media in the bed or in the bedroom can reduce the sleep inducing properties of the  
10 two latter, as the bed and bedroom become associated with electronic media use [17].

11  
12  
13  
14  
15  
16  
17 The present cross-sectional study will expand on the previous studies by taking a broad  
18 approach including measures of sleep duration, sleep onset latency, and sleep deficiency as  
19 well as including newer technological devices. Based on the presented literature on  
20 adolescent media use, we expected that the majority of adolescents would use electronic  
21 media devices at bedtime. Further, electronic media use was expected to be inversely related  
22 to sleep duration and positively related to sleep onset latency and sleep deficiency. Finally,  
23 we expected the association between sleep and media use to be similar across all  
24 devices/platforms.  
25  
26  
27  
28  
29  
30  
31

## 32 **METHODS**

### 33 **Study population**

34  
35  
36 In this cross-sectional population-based study, we used data from the youth@hordaland  
37 survey of adolescents in the county of Hordaland in Western Norway. All adolescent born  
38 from 1993 to 1995, and all students attending secondary education during spring 2012, were  
39 invited. The main aim of the survey was to assess prevalence of mental health problems and  
40 service use in adolescents. All questionnaires were piloted and refined in a single school in  
41 2011 before including it in the youth@hordaland study. Data were collected during spring  
42 2012. Adolescents in secondary education received information per e-mail, and time during  
43 regular school hours was allocated for them to complete the questionnaire. The questionnaire  
44 was web-based, and a teacher was present to organize the data collection and to ensure  
45 confidentiality. Survey staff was available on a phone number for both the adolescents and  
46 school personnel for answering queries. Those not in school received information and the  
47 questionnaire package by postal mail to their home addresses, and were provided with a  
48 prepaid envelope for returning of the questionnaires.  
49  
50  
51  
52  
53  
54  
55  
56  
57  
58  
59  
60

### Sample

A total of 19430 adolescents born between 1993 and 1995 were invited to participate, of which 10220 agreed, yielding a participation rate of 53%. The mean age of those participating was 17 years, and the sample included more girls (53.5% / n=5252) than boys (46.5% / n=4594). The majority (97.9% / n=9219) were high school students.

Sleep variables were checked for validity of answers, resulting in data from 374 subjects being excluded due to obvious invalid responses. For example, when calculating sleep duration and sleep efficiency, individuals with negative values on these computed variables were excluded from further the analyses. Thus, the total sample size in the current study was 9875.

### Instruments

#### *Use of electronic devices at bedtime*

As there are very few well-validated questionnaires assessing use of modern electronic devices, we chose to develop a new instrument assessing such use across a wide range of new electronic devices. This was done after a thorough review of the literature. Adolescents reported use of six different electronic media devices and if they used them in the bedroom the last hour before they went to sleep. The phrasing of the question was: “How many of the listed electronic devices do you use in your bedroom the last hour before going to sleep?” Drag and drop function was incorporated as a feature of the web-based questionnaire. An image with corresponding description of the device was dragged and dropped to indicate use, and ranked by frequency of use with the most frequently used device in the top box etc. The indicated devices comprised PC, cell phone, MP3 player, tablet, game console and TV. ~~No time frame was available for the ratings.~~

#### *Screen time during daytime*

Time spent on screen-based activity was assessed by the following question: “Outside of school hours how much time do you usually spend on the following on weekdays 1) TV-games (PlayStation, Xbox, Wii etc.), 2) PC games, 3) Internet chatting, 4) writing and reading emails, 5) using the PC for other purposes)?” The responses alternatives were: “no time”, “less than ½ hour”, “½ hour to 1 hour”, “2-3 hours”, “4 hours” and “more than 4 hours”. A similar question has been used in the Health Behaviour in School-aged Children (HBSC) studies [18]. A 2 hour cut-off was used as most recommendations for screen-based activities restrict this to about 2 hours per day and this cut-off has also been used in previous relevant studies [19][20, 21]

### *Sleep variables*

The adolescents' typical bedtime and rise time were indicated in hours and minutes using a scroll down menu with five minutes intervals and were reported separately for weekend and weekdays. Time in bed (TIB) was calculated by subtracting bedtime from rise time. Typical sleep onset latency (SOL) and wake after sleep onset (WASO) were indicated in hours and minutes using a scroll down menu with five minutes intervals, and sleep duration was defined as TIB minus SOL and WASO. Sleep duration was split into 10 categories, and SOL was categorized as either more or less than 60 minutes. Subjective sleep need (each individual's own perceived sleep need) was reported in hours and minutes on a scroll down menu with five minutes intervals, and the phrasing of the question was "How much sleep do you need to feel rested?" Sleep deficit was calculated separately for weekends and weekdays, subtracting total sleep duration from subjective sleep need. Weekday sleep deficiency is used in the present study, and was dichotomized into  $<2$  hours and  $\geq 2$  hours. For more information on sleep variables and sleep patterns in the present study see [22]

### **Statistics**

IBM SPSS Statistics 22 for Windows (SPSS Inc., Chicago, Ill) was used for all analyses. Chi-square tests were used to examine gender differences in use of electronic devices and daytime screen use. Independent sample t-tests and chi-square tests were used to examine the associations between sleep duration, electronic devices and daytime screen use. Logistic regression analyses using SOL of more than 60 minutes and sleep deficiency as outcome variables were conducted for all electronic devices and daytime screen (exposure variables). Multinomial logistic regression analyses were conducted with short sleep duration as the outcome variable (8-9 hours as the reference category) and electronic devices and daytime screen as the exposure variables. To investigate whether odds-ratios differed significantly between genders, we calculated the relative risk ratio (RRR) [23]. As these analyses yielded no significant gender differences, the results of the logistic regressions are presented without gender stratification.

### Ethics

The study was approved by the Regional Committee for Medical and Health Research Ethics (REC) in Western Norway. In accordance with the regulations from the REC and Norwegian health authorities, adolescents aged 16 years and older can make decisions regarding their own health, and may thus give consent themselves to participate in health studies.

Parents/guardians have the right to be informed, and in the current study, all parents/guardians received written information about the study in advance. If the adolescents decided to participate they indicated if they wanted to participate in the study as a whole, or they could choose three options to specify their level of consent: 1) to complete the questionnaire, 2) obtain information from parent questionnaire 3) linking data to national registries.

### RESULTS

#### Use of electronic devices before bedtime and daytime screen time

The use of electronic devices stratified by gender is shown in Figure 1. Most adolescents used an electronic device in the hour before [going to sleep](#). Some gender differences emerged, with more boys using game consoles, whereas girls reported higher use of cell phones and Mp3 players ( $P_s < .001$ ).

-----  
Please insert Figure 1 about here  
-----

The average number of hours of screen time stratified by gender is presented in Figure 2. Girls reported significantly more online chatting and other PC use, while boys reported more console games and PC games (all  $P_s < .001$ ).

-----  
Please insert Figure 2 about here  
-----

1  
2  
3 **Electronic devices at bedtime and daytime screen use in relation to long sleep onset**  
4 **latency**

5  
6 The odds ratios for reporting SOL of more than 60 minutes were calculated separately for  
7 each electronic device (Table 1). Use of PC, cell phone, Mp3-player, tablet, game console and  
8 TV were all associated with increased odds of SOL of more than 60 minutes.  
9

10  
11  
12 Daytime screen use showed the same pattern. A total screen time after school hours for more  
13 than four hours was related to long SOL (OR: 1.49, CI95% 1.36-1.64). When analyses were  
14 conducted separately for each electronic device, all daytime screen use over two hours was  
15 significantly associated with long SOL (see Table 1).  
16  
17

18  
19  
20  
21 **Electronic devices at bedtime and daytime screen use in relation to sleep deficit**

22 The odds for sleep deficiency of more than two hours were calculated separately for each  
23 electronic device (Table 1). Use of PC, cell phone, Mp3-player, game console and TV in the  
24 hour before [going to sleep](#) were all associated with increased odds of sleep deficiency.  
25  
26

27  
28  
29 Total daytime screen use after school of more than four hours was positively related to sleep  
30 deficit. When analyses were conducted separately for different electronic devices, all daytime  
31 screen use over two hours were significantly associated with a sleep deficit.  
32  
33

34  
35 -----  
36 Please insert Table 1 about here  
37  
38 -----  
39

40  
41 **Electronic devices at bedtime and daytime screen use in relation to sleep duration**

42 Hours of daytime screen use are presented in Figure 3. The odds for reporting short sleep  
43 duration (covering 4 different categories), with 8-9 hours as the reference category, was  
44 calculated separately for each electronic device (Table 2). A dose-response relationship  
45 emerged with the highest risk of short sleep duration under five hours, exemplified by the  
46 association between PC use and risk of less than five hours of sleep (OR: 2.70 CI95% 2.14-  
47 3.39), while the risk for 7-8 hours of sleep equaled an OR=1.64 (CI95% 1.38-1.96).  
48  
49

50  
51  
52 -----  
53 Please insert Figure 3 and Table 2 about here  
54  
55 -----  
56  
57  
58  
59  
60

1  
2  
3 Daytime screen use showed a similar pattern. Total screen time above 4 hours was associated  
4 with an increased risk of less than five hours of sleep (OR: 3.64 CI95% 3.06-4.33), while the  
5 risk for 7-8 hours of sleep was OR=1.29 (CI95% 1.12-1.49). See Table 2 for details.  
6  
7

### 8 9 **Multitasking of electronic devices at bedtime**

10 The risk of SOL of more than 60 minutes was increased in adolescents using 4 devices or  
11 more compared to adolescents using only one device (OR=1.26 (95% CI 1.07-1.49). The ORs  
12 for sleep deficiency for multitasking 2-3 devices was 1.50 (95% CI 1.26-1.79) and 4 or more  
13 devices 1.75 (95% CI 1.46-2.08), in comparison to using only one device. The ORs for  
14 sleeping less than 5 hours among multitasking teens ranged from 2.2 to 2.8 (depending on  
15 number of used devices) compared to only one device. The corresponding OR-ranges for  
16 sleeping 5-6 hour, 6-7 hours and 7-8 hours were 1.8-2.4, 1.9-2.1, and 1.4-1.5 respectively (all  
17  $P$ s<.001 compared to sleeping 8-9 hours).  
18  
19  
20  
21  
22  
23  
24  
25  
26

## 27 **DISCUSSION**

28  
29  
30 In short, almost all adolescents reported using one or more electronic devices during the last  
31 hour before bedtime. Extensive use of these devices was significantly and positively  
32 associated with SOL and sleep deficiency, with an inverse dose-response relationship  
33 between sleep duration and media use.  
34  
35  
36  
37

38 The present study adds to the literature by showing that both day- and bedtime use of  
39 electronic devices across a range of platforms, including newer technology, are related to  
40 several sleep parameters. While the frequency of use differed between the various devices,  
41 the relation between different types of electronic devices and sleep remained significant. This  
42 suggests that the established relationship between TV and sleep found in previous studies [5,  
43 6] can be generalized to newer technology. The relation between sleep and PC-use that has  
44 been demonstrated in previous studies in relation to poor sleep [8] and reduced time in bed [9,  
45 10], was further corroborated by the results of the present study as PC was both one of the  
46 most frequently used platforms and showed also the highest risks for short sleep duration and  
47 sleep deficiency. Using multiple devices before bedtime was related to longer SOL and  
48 shorter sleep duration compared to using only one electronic device.  
49  
50  
51  
52  
53  
54

55  
56 There are probably multiple pathways explaining the associations between sleep and  
57 electronic devices. Media use may directly affect sleep by replacing it due to its time  
58  
59  
60

1  
2  
3 consuming nature, or may interfere with sleep through increased psychophysiological arousal.  
4 Alternatively, the bright light exposure inherent in most electronic media devices [12] may  
5 interfere with sleep by delaying the circadian rhythm when exposure takes place in the  
6 evening [14] and/or by causing an immediate activation in itself [11, 15].  
7  
8  
9

10  
11 The relative importance of different devices is still a matter of discussion, although devices  
12 used for social communication have been proposed to have an especially negative effect on  
13 sleep [2]. However, the present study showed few statistically significant differences between  
14 the electronic devices. Further, both multitasking and the multi-functionality (e.g., homework  
15 vs. recreational use) of most platforms suggest that findings concerning the relationship  
16 between sleep and specific electronic devices and their type of use should be carefully  
17 interpreted.  
18  
19  
20  
21

22  
23 The present study found that the associations between electronic media use and sleep were  
24 robust across the included sleep parameters, including SOL, sleep deficit and sleep duration,  
25 extending on the previous findings on the relationship between electronic media use and time  
26 in bed [9, 10]. The scarcity of similar studies makes the current findings hard to compare. In  
27 the 2010 review it was reported that two studies of adolescents assessed SOL [5, 24], but after  
28 carefully reviewing these papers we could not find support for this. While the present study  
29 found a higher risk of long SOL associated with electronic media use, the exact cut-offs for  
30 long SOL at different developmental levels are not settled. Long SOL is usually defined as 31  
31 minutes or more in adults [25], but as adolescents may experience longer SOL due to  
32 biologically based delayed circadian rhythms occurring during puberty [26], we decided to  
33 use a cut-off of 60 minutes.  
34  
35  
36  
37  
38  
39  
40

41  
42 Sleep need varies between individuals, and one can argue that adolescents with less need of  
43 sleep may spend more time on electronic devices than individuals with more extensive sleep  
44 needs. The inclusion of perceived sleep need and sleep deficiency defined by subtracting the  
45 actual sleep from their perceived sleep allowed us to explore this further. In the current study,  
46 a sleep duration of 8-9 hours was chosen as the reference category for all regression analyses,  
47 as this was the average sleep need reported by the adolescents [4], and also because this  
48 corresponds well with experts' recommended sleep need in this age group [26]. A strong  
49 relationship between use of electronic devices and subjective sleep deficiency was present,  
50 thus indicating that use of electronic devices is related to sleeping less than what themselves  
51 and experts deem necessary [26].  
52  
53  
54  
55  
56  
57  
58  
59  
60

1  
2  
3 There are some methodological limitations of the present study that should be noted. First, the  
4 cross-sectional design prevents us from drawing inferences about directionality. An indication  
5 of a causal relationship is the dose-response relationship between sleep duration and media  
6 use. In terms of a reverse causality, it might be that some adolescents actively use media and  
7 technology as a sleeping aid [27], or to counteract boredom when not being able to sleep.  
8 Most likely the relationship between poor sleep and electronic media use reflects a self-  
9 perpetuating cycle. Second, the phrasing of the questions assessing daytime and bedtime use  
10 of electronic devices does not rule out some overlap between the two items. For example,  
11 when adolescents report a total screen time use of 6+ hours, it is not unlikely that some  
12 adolescents include the last hour before going to [sleep](#). Along the same lines, we had no  
13 information on the purpose of the screen time use, and as such we were not able to single out  
14 school-related work. [Also, as the items assessing bedtime use were phrased to assess use in  
15 the bedroom only, we had no information on screen use in other rooms, and how these might  
16 be related to sleep.](#) In addition it cannot be ruled out that some adolescents multitask and use  
17 electronic media in parallel with other activities. Third, the sleep measurements were solely  
18 based on self-reports, which renders the results susceptible to influence from the common  
19 method bias [28]. Although self-reported sleep parameters, including SOL and WASO  
20 typically differ from those obtained from objective assessments [29], recent studies have  
21 showed that self-report sleep assessments can be recommended for the characterization of  
22 sleep parameters in both clinical and population-based research [30]. Also, the accuracy of  
23 self-reported SOL and WASO are generally better among adolescents than in older adults  
24 [31], and a study of young adolescents in Hong Kong recently found good agreement between  
25 actigraphy measured and questionnaire reported sleep durations [32]. Fourth, there may be  
26 confounders, variables that are related to both sleep and media use, that were not assessed,  
27 e.g. emotional and behavioral problems. Further, the clinical significance of the results may  
28 be discussed as some of the increased risks were small in magnitude, and how much added  
29 functional significance these represent needs further exploration. Also, attrition from the  
30 study could affect generalizability, with a response rate of about 53% and with adolescents in  
31 schools overrepresented. The problem with non-participation in survey research seems  
32 unfortunately to be on the rise [33]. Official data show that in 2012, 92% of all adolescents in  
33 Norway aged 16-18 attended high school [34], compared to 98% in the current study. Based  
34 on previous research from the former waves of the Bergen Child Study (the same population  
35 as the current study), non-participants had more emotional and behavioural problems, albeit  
36 small in magnitude, in comparison the participants. [35]. It is therefore likely that the  
37 prevalence of sleep problems may be underestimated in the current study. Finally, the cross-  
38 sectional design of the study restricts causal attributions, and prospective studies are still  
39 needed to disentangle the temporal relationship.  
40  
41  
42  
43  
44  
45  
46  
47  
48  
49  
50  
51  
52  
53  
54  
55  
56  
57  
58  
59  
60



1  
2  
3  
4 The assessment method may also have influenced the results. While the daytime screen use  
5 was based on a previous validated instrument [18], the questions used for the assessment of  
6 bedtime use of electronic devices were new. A broader scope compared to most previous  
7 studies, including questions about cell phones and Mp3-players as well as newer technology  
8 such as tablets, is a strength of the present study. Screen time use cannot be regarded as the  
9 absolute time spent in front of a screen, as other platforms may not be included and there  
10 might be an overlap between the daytime and bedtime use.  
11  
12  
13  
14  
15

16  
17 Parallel with the rapid change in technology, the recommendations for healthy media use  
18 given to parents and adolescence also need updating, and age-specific guidelines regarding  
19 the quantity and timing of electronic media use should be developed and made known to the  
20 public [12]. The current recommendation is not to have a TV in the bedroom [36]. It seems,  
21 however, that there may be other electronic devices exerting the same negative influence on  
22 sleep, such as PCs and mobile phones. The results confirm recommendations for restricting  
23 media use in general. The combination of secular trends to impaired sleep (see[3] and the  
24 established relationship to health and school achievement [37] underscore the importance of  
25 prevention. The scope of the problem suggests that this is a public health issue and that  
26 primary prevention may be needed. Parent-set bedtimes have been shown to be related to  
27 good sleep hygiene in adolescents [38] and an increased parental involvement in technology  
28 use could be a recommendation based on the findings, but this needs further evidence. While  
29 technology use may be a source of sleep deficiency, this may also serve as a medium of  
30 intervention, as internet-based interventions have proven to be effective and cost-efficient  
31 modes of treating sleep problems [39].  
32  
33  
34  
35  
36  
37  
38  
39  
40  
41  
42  
43  
44  
45  
46  
47  
48  
49  
50  
51  
52  
53  
54  
55  
56  
57  
58  
59  
60

### CONTRIBUTORSHIP STATEMENT

Author KM, AJL, RJ and MH were involved in acquisition of data. Authors MH and BS were responsible for conception and design of the study. BS and MH did the analysis and interpretation of data. MH, BS and SP drafted the manuscript. Authors KM, RJ and AJL gave critical revision of the manuscript for important intellectual content. KM and RJ obtained funding, and KM, RJ and AJL gave materialistic, technical or material support. Authors MH and BS had full access to all the data in the study and takes responsibility for the integrity of the data and the accuracy of the data analysis.

### COMPETING INTERESTS

The authors declare that they have no competing interests.

### FUNDING

The youth@hordaland study was funded by Uni Research Health and Norwegian Directorate for Health and Social Affairs.

### DATA SHARING

Data for research projects from the population-based youth@hordaland study may be made available at request from Regional Centre for Child and Youth Mental Health and Child Welfare, Uni Research Health, Bergen, Norway.

### ACKNOWLEDGEMENTS

The authors would like to thank Regional Centre for Child and Youth Mental Health and Child Welfare at Uni Research Health for making the collection of the data, and making the data available for this study. The authors would like to thank the participants for their time and effort.

## REFERENCES

1. National Sleep Foundation: **Sleep In America Poll**. In: <http://www.sleepfoundation.org/article/sleep-america-polls/2006-teens-and-sleep>. vol. 2006; 2006.
2. Van den Bulck J. Text messaging as a cause of sleep interruption in adolescents, evidence from a cross-sectional study *J Sleep Res* 2003;12:263.
3. Pallesen S, Hetland J, Sivertsen B *et al*. Time trends in sleep-onset difficulties among Norwegian adolescents: 1983--2005 *Scand J Public Health* 2008;36:889-95.
4. Hysing M, Pallesen S, Stormark KM *et al*. Sleep patterns and insomnia among adolescents: a population-based study *Journal of sleep research* 2013;22:549-56.
5. Van den Bulck J. The effects of media on sleep *Adolesc Med State Art Rev* 2010;21:418-29, vii.
6. Adam EK, Snell EK, Pendry P. Sleep timing and quantity in ecological and family context: a nationally representative time-diary study *J Fam Psychol* 2007;21:4-19.
7. Thorleifsdottir B, Bjornsson JK, Benediktsdottir B *et al*. Sleep and sleep habits from childhood to young adulthood over a 10-year period *J Psychosom Res* 2002;53:529-37.
8. Dorofaeff TF, Denny S. Sleep and adolescence. Do New Zealand teenagers get enough? *J Paediatr Child Health* 2006;42:515-20.
9. Punamaki RL, Wallenius M, Nygard CH *et al*. Use of information and communication technology (ICT) and perceived health in adolescence: the role of sleeping habits and waking-time tiredness *J Adolesc* 2007;30:569-85.
10. Yen CF, Ko CH, Yen JY *et al*. The multidimensional correlates associated with short nocturnal sleep duration and subjective insomnia among Taiwanese adolescents *Sleep* 2008;31:1515-25.
11. Weaver E, Gradisar M, Dohnt H *et al*. The effect of presleep video-game playing on adolescent sleep *J Clin Sleep Med* 2010;6:184-9.
12. Cain N, Gradisar M. Electronic media use and sleep in school-aged children and adolescents: A review *Sleep medicine* 2010;11:735-42.
13. Weissbluth M, Poncher J, Given G *et al*. Sleep duration and television viewing *J Pediatr* 1981;99:486-8.
14. Khalsa SB, Jewett ME, Cajochen C *et al*. A phase response curve to single bright light pulses in human subjects *J Physiol* 2003;549:945-52.
15. Campbell SS, Dijk DJ, Boulos Z *et al*. Light treatment for sleep disorders: consensus report. III. Alerting and activating effects *J Biol Rhythms* 1995;10:129-32.
16. Thomee S, Dellve L, Harenstam A *et al*. Perceived connections between information and communication technology use and mental symptoms among young adults - a qualitative study *BMC Public Health* 2010;10:66.
17. Hauri P, Fisher J. Persistent psychophysiologic (learned) insomnia *Sleep* 1986;9:38-53.

18. Melkevik O, Torsheim T, Iannotti RJ *et al*. Is spending time in screen-based sedentary behaviors associated with less physical activity: a cross national investigation *The international journal of behavioral nutrition and physical activity* 2010;7:46.
19. Bar-on ME. The effects of television on child health: implications and recommendations *Archives of disease in childhood* 2000;83:289-92.
20. Owens J, Maxim R, McGuinn M *et al*. Television-viewing habits and sleep disturbance in school children *Pediatrics* 1999;104:e27.
21. Alexandru G, Michikazu S, Shimako H *et al*. Epidemiological aspects of self-reported sleep onset latency in Japanese junior high school children *J Sleep Res* 2006;15:266-75.
22. Hysing M, Pallesen S, Stormark KM *et al*. Sleep patterns and insomnia among adolescents: a population-based study *Journal of sleep research* 2013;22:549-56.
23. Altman DG, Bland JM. Interaction revisited: the difference between two estimates *Bmj* 2003;326:219.
24. Johnson JG, Cohen P, Kasen S *et al*. Association between television viewing and sleep problems during adolescence and early adulthood *Arch Pediatr Adolesc Med* 2004;158:562-8.
25. Lichstein KL, Durrence HH, Taylor DJ *et al*. Quantitative criteria for insomnia *Behav Res Ther* 2003;41:427-45.
26. Carskadon MA, Harvey K, Duke P *et al*. Pubertal changes in daytime sleepiness *Sleep* 1980;2:453-60.
27. Eggermont S, Van den Bulck J. Nodding off or switching off? The use of popular media as a sleep aid in secondary-school children *J Paediatr Child Health* 2006;42:428-33.
28. Podsakoff PM, MacKenzie SB, Lee JY *et al*. Common method biases in behavioral research: A critical review of the literature and recommended remedies *Journal of Applied Psychology* 2003;88:879-903.
29. Lauderdale DS, Knutson KL, Yan LL *et al*. Self-reported and measured sleep duration: how similar are they? *Epidemiology* 2008;19:838-45.
30. Zinkhan M, Berger K, Hense S *et al*. Agreement of different methods for assessing sleep characteristics: a comparison of two actigraphs, wrist and hip placement, and self-report with polysomnography *Sleep medicine* 2014.
31. Dillon HR, Lichstein KL, Dautovich ND *et al*. Variability in self-reported normal sleep across the adult age span *J Gerontol B Psychol Sci Soc Sci* 2014.
32. Kong AP, Wing YK, Choi KC *et al*. Associations of sleep duration with obesity and serum lipid profile in children and adolescents *Sleep medicine* 2011;12:659-65.
33. Morton SMB, Bandara DK, Robinson EM *et al*. In the 21st Century, what is an acceptable response rate? *Aust Nz J Publ Heal* 2012;36:106-8.
34. The Directorate of Integration and Diversity (IMDi): **[Education participation in high schools]**. <http://www.imdi.no/no/Fakta-og-statistikk/Fakta-og-statistikk/Utdanning/?tab=chr>; 2012.

- 1  
2  
3 35. Stormark KM, Heiervang E, Heimann M *et al*. Predicting nonresponse bias from teacher  
4 ratings of mental health problems in primary school children *J Abnorm Child Psychol*  
5 2008;36:411-9.  
6  
7 36. Gentile DA, Oberg C, Sherwood NE *et al*. Well-child visits in the video age: pediatricians and  
8 the American Academy of Pediatrics' guidelines for children's media use *Pediatrics*  
9 2004;114:1235-41.  
10  
11 37. Dewald JF, Meijer AM, Oort FJ *et al*. The influence of sleep quality, sleep duration and  
12 sleepiness on school performance in children and adolescents: A meta-analytic review *Sleep*  
13 *medicine reviews* 2010;14:179-89.  
14  
15 38. Short MA, Gradisar M, Wright H *et al*. Time for bed: parent-set bedtimes associated with  
16 improved sleep and daytime functioning in adolescents *Sleep* 2011;34:797-800.  
17  
18 39. Sivertsen B, Vedaa O, Nordgreen T. The future of insomnia treatment-the challenge of  
19 implementation *Sleep* 2013;36:303-4.  
20  
21  
22  
23  
24  
25  
26  
27  
28  
29  
30  
31  
32  
33  
34  
35  
36  
37  
38  
39  
40  
41  
42  
43  
44  
45  
46  
47  
48  
49  
50  
51  
52  
53  
54  
55  
56  
57  
58  
59  
60

Table 1. Use of electronic devices in the last hour before bedtime and daytime screen use as risk factors for sleep onset latency (SOL) of 60 minutes or more and sleep deficiency of 2 hours or more in the youth@hordaland study (n=9846).<sup>§</sup>

|                                                       | SOL (≥60 minutes)   |           | Sleep deficit (≥2 hours) |           |
|-------------------------------------------------------|---------------------|-----------|--------------------------|-----------|
|                                                       | OR                  | 95% CI    | OR                       | 95% CI    |
| <b>Electronic devices in last hour before bedtime</b> |                     |           |                          |           |
| PC                                                    | 1.52 <sup>***</sup> | 1.34-1.71 | 1.53 <sup>***</sup>      | 1.34-1.76 |
| Cell phone                                            | 1.48 <sup>***</sup> | 1.30-1.68 | 1.35 <sup>***</sup>      | 1.17-1.55 |
| MP3-Player                                            | 1.36 <sup>***</sup> | 1.25-1.48 | 1.21 <sup>***</sup>      | 1.10-1.32 |
| Tablet                                                | 1.18 <sup>***</sup> | 1.08-1.29 | 1.12 <sup>†</sup>        | 1.02-1.23 |
| Console                                               | 1.13 <sup>***</sup> | 1.04-1.23 | 1.20 <sup>***</sup>      | 1.10-1.32 |
| TV                                                    | 1.19 <sup>***</sup> | 1.10-1.30 | 1.36 <sup>***</sup>      | 1.24-1.49 |
| <b>Daytime screen use</b>                             |                     |           |                          |           |
| Total screen time (4 hours +)                         | 1.49 <sup>***</sup> | 1.36-1.64 | 1.72 <sup>***</sup>      | 1.56-1.89 |
| Console games (2 hours +)                             | 1.20 <sup>†</sup>   | 1.04-1.38 | 1.31 <sup>***</sup>      | 1.13-1.52 |
| PC Games (2 hours +)                                  | 1.19 <sup>**</sup>  | 1.05-1.34 | 1.41 <sup>***</sup>      | 1.25-1.60 |
| Online chat (2 hours +)                               | 1.43 <sup>***</sup> | 1.31-1.56 | 1.87 <sup>***</sup>      | 1.70-2.05 |
| E-mail (2 hours +)                                    | 1.93 <sup>***</sup> | 1.55-2.40 | 1.68 <sup>***</sup>      | 1.31-2.14 |
| Other PC use (2 hours +)                              | 1.38 <sup>***</sup> | 1.26-1.51 | 1.37 <sup>***</sup>      | 1.25-1.51 |

§ Reference: SOL < 60 minutes  
p<.05; <sup>†</sup>p<.01; <sup>\*\*</sup>p<.001;

**Table 2.** Use of electronic devices in last hour before going to sleep and daytime screen use as risk factors for short sleep duration among girls and boys in the youth@hordaland study (n=9846).<sup>§</sup>

|                                                       | < 5hours |           | 5-6 hours |           | 6-7 hours |           | 7-8 hours |           |
|-------------------------------------------------------|----------|-----------|-----------|-----------|-----------|-----------|-----------|-----------|
|                                                       | OR       | 95% CI    | OR        | 95% CI    | OR        | 95% CI    | OR        | 95% CI    |
| <b>Electronic devices in last hour before bedtime</b> |          |           |           |           |           |           |           |           |
| PC                                                    | 2.70***  | 2.14-3.39 | 2.69***   | 2.09-3.46 | 2.30***   | 1.90-2.79 | 1.64***   | 1.38-1.96 |
| Cell phone                                            | 1.85***  | 1.45-2.35 | 1.65***   | 1.28-2.13 | 1.75***   | 1.42-2.15 | 1.50***   | 1.24-1.83 |
| MP3-Player                                            | 1.52***  | 1.29-1.78 | 1.46***   | 1.12-1.73 | 1.33***   | 1.15-1.53 | 1.19*     | 1.03-1.36 |
| iPad or other tablet                                  | 1.19*    | 1.01-1.41 | 1.29**    | 1.09-1.54 | 1.18*     | 1.92-1.37 | 1.10      | 0.95-1.28 |
| Console                                               | 1.40***  | 1.19-1.64 | 1.38***   | 1.17-1.64 | 1.27**    | 1.09-1.47 | 1.17*     | 1.01-1.35 |
| TV                                                    | 1.51***  | 1.29-1.77 | 1.44***   | 1.22-1.71 | 1.35***   | 1.17-1.56 | 1.16*     | 1.01-1.33 |
| <b>Daytime screen use</b>                             |          |           |           |           |           |           |           |           |
| Total screen time (4 hours +)                         | 3.64***  | 3.06-4.33 | 2.66***   | 2.22-3.19 | 2.07***   | 1.79-2.40 | 1.29***   | 1.12-1.49 |
| Console games (2 hours +)                             | 2.03***  | 1.53-2.69 | 1.73***   | 1.28-2.35 | 1.58**    | 1.21-2.06 | 1.20      | 0.92-1.58 |
| PC Games (2 hours +)                                  | 1.90***  | 1.51-2.38 | 1.22      | 0.95-1.58 | 1.39**    | 1.12-1.73 | 1.06      | 0.86-1.32 |
| Online chat (2 hours +)                               | 3.58***  | 3.03-4.24 | 2.79***   | 2.33-3.33 | 1.98***   | 1.70-2.30 | 1.31***   | 1.13-1.51 |
| E-mail (2 hours +)                                    | 3.28***  | 2.07-5.16 | 2.42***   | 1.48-3.95 | 1.34      | 0.84-2.14 | 1.14      | 0.72-1.82 |
| Other PC use (2 hours +)                              | 2.06***  | 1.74-2.42 | 2.04***   | 1.71-2.44 | 1.54***   | 1.33-1.78 | 1.21**    | 1.05-1.39 |

§ Reference: 8-9 hours  
p<.05; \*\* p<.01; \*\*\* p<.001;

**FIGURE LEGENDS**

Figure 1: Use of electronic devices during the last hour before bedtime among girls and boys in the youth@hordaland study (n=9846). Error bars represent 95% confidence intervals.

Figure 2: Average daytime screen use among girls and boys in the youth@hordaland study (n=9846). Error bars represent 95% confidence intervals.

Figure 3: Sleep duration and hours of screen use among adolescents in the youth@hordaland study (n=9846).

For peer review only



1  
2  
3  
4  
5  
6  
7  
8  
9  
10  
11  
12  
13  
14  
15  
16  
17  
18  
19  
20  
21  
22  
23  
24  
25  
26  
27  
28  
29  
30  
31  
32  
33  
34  
35  
36  
37  
38  
39  
40  
41  
42  
43  
44  
45  
46  
47  
48  
49  
50  
51  
52  
53  
54  
55  
56  
57  
58  
59  
60



Use of electronic devices during the last hour before bedtime among girls and boys in the youth@hordaland study (n=9846). Error bars represent 95% confidence intervals.  
297x209mm (300 x 300 DPI)

Review only

1  
2  
3  
4  
5  
6  
7  
8  
9  
10  
11  
12  
13  
14  
15  
16  
17  
18  
19  
20  
21  
22  
23  
24  
25  
26  
27  
28  
29  
30  
31  
32  
33  
34  
35  
36  
37  
38  
39  
40  
41  
42  
43  
44  
45  
46  
47  
48  
49  
50  
51  
52  
53  
54  
55  
56  
57  
58  
59  
60



Average daytime screen use among girls and boys in the youth@hordaland study (n=9846). Error bars represent 95% confidence intervals.  
297x209mm (300 x 300 DPI)

ew only

1  
2  
3  
4  
5  
6  
7  
8  
9  
10  
11  
12  
13  
14  
15  
16  
17  
18  
19  
20  
21  
22  
23  
24  
25  
26  
27  
28  
29  
30  
31  
32  
33  
34  
35  
36  
37  
38  
39  
40  
41  
42  
43  
44  
45  
46  
47  
48  
49  
50  
51  
52  
53  
54  
55  
56  
57  
58  
59  
60



Sleep duration and hours of screen use among adolescents in the youth@hordaland study (n=9846).  
297x209mm (300 x 300 DPI)

view only
